# Supplementary material
Source: Royal Society of Chemistry journal article supplement (doi:10.1039/d6eb00040a)
Supplement: d6eb00040a1.xlsx [file d6eb00040a1.xlsx]

## Sheet: Strain Data
1st_discharge_time (hr)	1st_discharge_volt	1st_discharge_cur	1st_discharge_strain		1st_charge_time (hr)	1st_charge_volt	1st_charge_cur	1st_charge_strain)cumulative		2nd_discharge_time (hr)	2nd_discharge_volt	2nd_discharge_cur	2nd_discharge_strain_cumulative		2nd_charge_time (hr)	2nd_charge_volt	2nd_charge_cur	2nd_charge_strain_cumulative		3rd_discharge_time (hr)	3rd_discharge_volt	3rd_discharge_cur	3rd_discharge_strain_cumulative		3rd_charge_time (hr)	3rd_charge_volt	3rd_charge_cur	3rd_charge_strain_cumulative		4th_discharge_time (hr)	4th_discharge_volt	4th_discharge_cur	4th_discharge_strain_cumulative		4th_charge_time (hr)	4th_charge_volt	4th_charge_cur	4th_charge_strain_cumulative		5th_discharge_time (hr)	5th_discharge_volt	5th_discharge_cur	5th_discharge_strain_cumulative		5th_charge_time (hr)	5th_charge_volt	5th_charge_cur	5th_charge_strain+cumulative
0	1.5642	-4.33384	0		3.1068	1.00327	-33.8729	-0.0200411		14.1656	3.00112	0.769477	-0.0108499		25.265	1.00522	-22.9626	-0.0246669		36.3186	2.99782	0.348678	-0.0311442		47.4105	1.00542	-16.8234	-0.0360599		58.4712	2.99703	0.680036	-0.0106238		69.5285	1.00081	-16.2558	-0.000112768		80.618	2.99652	0.609264	0.0123217		91.6745	1.00194	-14.4413	-0.00906735
0.0342349	1.55804	-12.245	-0.00244431		3.14703	1.01051	-32.1549	-0.0137211		14.206	2.99384	0.533736	-0.0105255		25.2942	1.01048	-21.3034	-0.0384749		36.3508	2.99203	0.477303	-0.0313067		47.4484	1.01224	-14.8941	-0.029948		58.5049	2.99097	0.532955	-0.0115622		69.5605	1.00658	-14.6143	0.00848278		80.6516	2.99047	0.34662	0.0190796		91.7066	1.00772	-12.8728	-0.0090708
0.0673824	1.55207	-21.3012	-0.0011037		3.17129	1.01488	-29.313	-0.0138942		14.241	2.98754	0.679965	-0.0110802		25.328	1.01657	-19.8712	-0.0370992		36.3831	2.98622	0.334694	-0.0309119		47.4811	1.01812	-14.1968	-0.0286397		58.5395	2.98473	0.378776	-0.0151353		69.5942	1.01264	-12.7999	0.00868685		80.6836	2.9847	0.454659	0.0185245		91.7402	1.01378	-11.8954	-0.0148963
0.100226	1.54616	-33.351	-0.000928384		3.20536	1.02101	-28.7565	-0.0126692		14.274	2.98161	0.55063	-0.0105208		25.3628	1.02283	-18.7617	-0.0340233		36.4209	2.97941	-0.0587755	-0.0303284		47.5112	1.02353	-13.3198	-0.027726		58.5748	2.97838	0.289193	-0.0146608		69.6272	1.01858	-12.3811	0.00572265		80.7173	2.97865	0.294801	0.0211074		91.7732	1.01972	-10.8926	-0.0170383
0.133718	1.54013	-46.326	-0.00111107		3.23846	1.02697	-26.6466	-0.0129545		14.3048	2.97606	0.26669	-0.0106383		25.3934	1.02834	-17.8754	-0.0304124		36.4478	2.97457	0.330435	-0.0304082		47.5471	1.03	-13.2009	-0.0285246		58.6058	2.9728	0.344845	-0.0161864		69.662	1.02484	-11.475	0.00534309		80.7511	2.97255	0.293239	0.0214217		91.8069	1.02579	-10.2945	-0.0179244
0.166741	1.53419	-58.6453	0.000466377		3.27154	1.03292	-25.1982	-0.0141936		14.3384	2.97001	0.388643	-0.0112937		25.4245	1.03393	-17.1419	-0.0314608		36.4855	2.96778	0.342857	-0.0307945		47.5811	1.03612	-12.3274	-0.0273827		58.6417	2.96634	0.410506	-0.0174999		69.6996	1.03161	-11.239	0.00398487		80.784	2.96664	0.159929	0.0216718		91.8405	1.03183	-10.1077	-0.0203385
0.202496	1.52775	-72.1309	-0.000679189		3.30578	1.03909	-23.3017	-0.0126582		14.3712	2.96411	0.423283	-0.0116954		25.4618	1.04064	-15.7299	-0.028882		36.5178	2.96196	0.329441	-0.0306545		47.6158	1.04236	-11.8749	-0.0283757		58.6756	2.96024	0.241917	-0.0165419		69.7272	1.03658	-10.9976	0.00228098		80.8169	2.96071	0.358048	0.0238625		91.8766	1.03832	-9.02971	-0.0218666
0.235068	1.52189	-84.0425	-0.00108729		3.34008	1.04526	-22.0462	-0.0118522		14.4054	2.95795	0.581793	-0.0119661		25.4944	1.04653	-15.5766	-0.0272376		36.551	2.95599	0.443656	-0.0316541		47.6469	1.04796	-11.8782	-0.0295474		58.7059	2.95479	0.122804	-0.0166247		69.7605	1.04256	-10.2463	-0.00146882		80.8508	2.95461	0.00731145	0.0233698		91.9072	1.04383	-8.83465	-0.0185476
0.268106	1.51594	-95.4986	-0.00203889		3.37348	1.05127	-21.4059	-0.0115948		14.4407	2.95159	0.324259	-0.0133155		25.5274	1.05246	-14.8728	-0.0265869		36.5849	2.9499	0.501722	-0.0323808		47.68	1.05393	-11.251	-0.0281037		58.7394	2.94876	0.239858	-0.0164457		69.7947	1.04873	-9.77115	0.00332486		80.8839	2.94866	0.138634	0.0225057		91.9399	1.04971	-8.61999	-0.0153533
0.30196	1.50985	-106.573	-0.00250712		3.40622	1.05716	-20.3994	-0.0104817		14.4746	2.9455	0.492281	-0.0135918		25.5608	1.05847	-15.0223	-0.0287399		36.6239	2.94287	0.0506833	-0.0316273		47.7148	1.06018	-11.052	-0.0281155		58.7724	2.94282	0.104206	-0.0159683		69.8268	1.05451	-9.74716	-6.8468e-05		80.9168	2.94273	0.105768	0.0224956		91.9754	1.0561	-8.12558	-0.0164407
0.334946	1.50391	-116.574	-0.00483061		3.43924	1.06311	-18.9884	-0.0114636		14.507	2.93966	0.32795	-0.0143848		25.5939	1.06443	-14.3162	-0.028861		36.6509	2.93801	0.270595	-0.0307229		47.748	1.06616	-10.8288	-0.0307025		58.8046	2.93702	0.065945	-0.0140726		69.864	1.06119	-9.31883	-0.0015241		80.9505	2.93666	0.190311	0.0230783		92.0149	1.06321	-8.15063	-0.0112408
0.367559	1.49804	-126.365	-0.00752923		3.47201	1.06901	-18.336	-0.0129267		14.5422	2.93332	0.35386	-0.013468		25.6277	1.0705	-14.0373	-0.0301787		36.6853	2.93181	0.151624	-0.0312995		47.782	1.07229	-10.042	-0.0308592		58.8401	2.93063	0.0760249	-0.016297		69.8949	1.06677	-9.21697	-0.000849335		80.9835	2.93072	-0.0107187	0.021008		92.042	1.0681	-8.07532	-0.00897505
0.4026	1.49173	-136.36	-0.0107587		3.5058	1.07509	-16.7756	-0.0145456		14.5752	2.92739	0.322272	-0.0134404		25.662	1.07668	-13.6403	-0.0307033		36.7171	2.9261	0.19677	-0.0316069		47.8137	1.078	-9.88025	-0.0314739		58.8729	2.92472	0.290683	-0.0153973		69.9286	1.07282	-8.72433	-0.000551495		81.018	2.92452	0.0993789	0.0191428		92.0764	1.07429	-7.77079	-0.00727317
0.435074	1.48589	-144.329	-0.0143282		3.53724	1.08075	-16.5208	-0.0156611		14.6121	2.92074	0.42449	-0.0131959		25.6994	1.08342	-13.5341	-0.0313914		36.7521	2.91979	0.179237	-0.0318021		47.8493	1.08439	-9.78293	-0.0298797		58.9067	2.91864	0.284508	-0.0170267		69.9614	1.07872	-8.43024	-0.00188171		81.0505	2.91867	0.270666	0.0172646		92.1105	1.08043	-7.44426	-0.0104651
0.470613	1.47949	-152.119	-0.0180334		3.57291	1.08717	-16.051	-0.0157951		14.642	2.91536	0.351517	-0.0128007		25.7308	1.08907	-13.2481	-0.0303667		36.7866	2.91359	0.117409	-0.0325854		47.8823	1.09034	-9.2952	-0.0295419		58.9391	2.91281	0.065874	-0.0187887		69.9914	1.08414	-8.14361	-0.00247811		81.0814	2.9131	0.00461402	0.0165068		92.1418	1.08605	-7.29186	-0.00636401
0.501863	1.47387	-158.951	-0.0218468		3.60686	1.09328	-15.7074	-0.0143031		14.6744	2.90954	0.341225	-0.0123779		25.763	1.09487	-13.1003	-0.0300626		36.8199	2.90759	0.234392	-0.0330394		47.9142	1.09608	-9.36817	-0.0305697		58.9723	2.90683	0.107542	-0.0196835		70.0278	1.09068	-8.01363	-0.00378615		81.1173	2.90663	0.206069	0.0155027		92.1745	1.09195	-7.24153	-0.00771256
0.534919	1.46792	-165.783	-0.0259741		3.63902	1.09907	-15.1919	-0.0136493		14.7078	2.90351	0.255191	-0.0136609		25.7935	1.10036	-11.9192	-0.0282341		36.8523	2.90175	0.0291748	-0.0318179		47.9478	1.10213	-9.33353	-0.0301805		59.002	2.90149	0.00901509	-0.0187123		70.0634	1.09709	-7.94123	-0.00243633		81.1502	2.90072	0.070701	0.0161474		92.2084	1.09805	-6.70169	-0.00657594
0.568612	1.46185	-169.758	-0.0312473		3.67465	1.10548	-14.6566	-0.0121416		14.7417	2.89741	0.118048	-0.0132903		25.8303	1.10698	-12.1274	-0.0293202		36.8852	2.89584	0.254552	-0.0308903		47.9805	1.10802	-8.81016	-0.0293785		59.0378	2.89505	0.15276	-0.0191792		70.0947	1.10273	-7.44455	-0.00129537		81.1839	2.89465	0.216859	0.0172261		92.2423	1.10415	-6.71823	-0.00771603
0.602005	1.45584	-172.709	-0.0353627		3.70426	1.11081	-13.9973	-0.0112394		14.7751	2.8914	0.235954	-0.0140332		25.8625	1.11278	-11.9769	-0.0310295		36.9185	2.88984	0.0469211	-0.0307725		48.0162	1.11443	-8.52501	-0.0301151		59.0721	2.88886	0.240781	-0.0204961		70.1293	1.10895	-7.84689	-0.00399665		81.218	2.88852	0.14701	0.0186765		92.275	1.11005	-6.59954	-0.00513423
0.63483	1.44993	-173.622	-0.0402328		3.73878	1.11702	-15.5064	-0.0116104		14.8079	2.88549	0.190453	-0.0149158		25.8964	1.11889	-11.3883	-0.0325308		36.9516	2.88389	0.416895	-0.0304431		48.0484	1.12024	-8.41079	-0.0308401		59.1053	2.88289	0.2263	-0.0204616		70.1656	1.11549	-7.30996	-0.000607926		81.2527	2.88228	0.123159	0.0158037		92.3076	1.1159	-6.74996	-0.00620598
0.669509	1.44369	-169.921	-0.0447279		3.77304	1.12319	-14.1244	-0.012731		14.8397	2.87977	-0.00397516	-0.0159686		25.9285	1.12465	-11.5443	-0.0346964		36.9845	2.87796	0.34811	-0.0319029		48.0822	1.12632	-8.52863	-0.0277874		59.139	2.87682	-0.0675777	-0.020693		70.1966	1.12106	-6.91138	3.5134e-05		81.2857	2.87632	-0.0151908	0.0152562		92.3418	1.12205	-6.59117	-0.00823218
0.702128	1.43782	-158.586	-0.0469139		3.80681	1.12927	-13.9054	-0.0139986		14.8814	2.87227	0.356983	-0.0154629		25.9626	1.13079	-10.9401	-0.0352596		37.0196	2.87164	-0.202236	-0.0331457		48.1169	1.13256	-8.09079	-0.028986		59.1716	2.87096	0.0464242	-0.0190798		70.2304	1.12715	-6.71993	0.000463257		81.3212	2.86994	-0.0674357	0.0148857		92.3734	1.12775	-6.24142	-0.0108058
0.735419	1.43183	-134.17	-0.0485876		3.84123	1.13547	-12.6343	-0.0148606		14.9091	2.86729	0.207063	-0.0161505		25.9957	1.13675	-10.9305	-0.0380589		37.0522	2.86577	0.100728	-0.0325633		48.1482	1.1382	-7.9895	-0.0288207		59.2112	2.86383	0.199113	-0.0204106		70.263	1.13301	-7.09417	-0.00212443		81.3513	2.86452	0.185129	0.0149453		92.4076	1.1339	-6.20174	-0.0123519
0.767793	1.426	-95.8826	-0.0501018		3.87363	1.1413	-12.3182	-0.0154904		14.9408	2.86157	0.22417	-0.015423		26.0319	1.14327	-10.6981	-0.0375398		37.0849	2.85989	-0.0261225	-0.0329688		48.1845	1.14474	-7.86996	-0.0312377		59.2411	2.85845	-0.0733984	-0.0184568		70.2959	1.13895	-7.12469	-0.00162743		81.3866	2.85816	0.0640284	0.0135788		92.4423	1.14016	-5.65715	-0.0123115
0.801677	1.4199	-63.4339	-0.049217		3.90233	1.14646	-12.1371	-0.0167577		14.9769	2.85508	-0.0317303	-0.0139636		26.0613	1.14856	-10.0515	-0.0391895		37.1206	2.85346	0.211109	-0.033285		48.2153	1.15028	-7.89097	-0.0315012		59.273	2.85271	-0.00603372	-0.0169426		70.3304	1.14515	-6.76508	-0.00575774		81.4192	2.85229	-0.070559	0.0152525		92.4753	1.14609	-5.90403	-0.0148524
0.837157	1.41351	-49.8983	-0.0480433		3.94061	1.15335	-12.3145	-0.0182583		15.0068	2.84969	0.197622	-0.012558		26.0905	1.15382	-10.0474	-0.038007		37.1541	2.84744	0.241136	-0.0323462		48.247	1.15598	-6.93324	-0.0341324		59.308	2.84641	-0.0291038	-0.0179985		70.3632	1.15105	-6.75699	-0.00613469		81.4534	2.84615	0.100515	0.0163245		92.5089	1.15215	-5.84866	-0.0158024
0.870536	1.40751	-44.3239	-0.0477299		3.9738	1.15933	-11.7505	-0.0187742		15.0415	2.84346	0.117551	-0.0126889		26.1296	1.16085	-9.86066	-0.0409102		37.1869	2.84154	0.143674	-0.032118		48.2822	1.16231	-7.44838	-0.03328		59.3408	2.8405	0.211819	-0.0178527		70.3951	1.15679	-6.49299	-0.00703996		81.4862	2.84024	0.042591	0.0177308		92.5425	1.15819	-5.63557	-0.0178286
0.903507	1.40157	-39.8455	-0.0446727		4.00801	1.16549	-11.6092	-0.0194284		15.0744	2.83752	0.133523	-0.01214		26.1626	1.1668	-9.6585	-0.0393543		37.2195	2.83567	0.188252	-0.033554		48.3117	1.16764	-7.24522	-0.0362263		59.3756	2.83424	0.0937001	-0.0156075		70.4305	1.16316	-6.09959	-0.00769183		81.5174	2.83461	0.0961846	0.0198205		92.5745	1.16395	-5.91702	-0.0176752
0.938581	1.39526	-36.4836	-0.0439933		4.0429	1.17177	-11.7464	-0.0210125		15.1083	2.83143	0.0313044	-0.0118448		26.1964	1.17288	-9.49033	-0.0403106		37.2532	2.8296	0.189814	-0.0323029		48.3488	1.17432	-7.29186	-0.0370799		59.408	2.82841	-0.0080213	-0.016781		70.4635	1.16912	-6.36458	-0.00720958		81.5529	2.82824	0.194499	0.018901		92.6075	1.16989	-5.85221	-0.0172678
0.970348	1.38954	-34.3028	-0.0441002		4.0738	1.17733	-10.6653	-0.0211358		15.1493	2.82404	-0.0449335	-0.0130622		26.2294	1.17882	-9.32111	-0.0399153		37.2874	2.82344	-0.112795	-0.032438		48.3811	1.18012	-7.36994	-0.0380368		59.4356	2.82344	0.0299557	-0.0161994		70.4969	1.17512	-6.63794	-0.00666912		81.5861	2.82225	0.098882	0.0202731		92.643	1.17627	-5.38364	-0.0178607
1.00314	1.38364	-31.9972	-0.0445529		4.10716	1.18333	-10.2509	-0.0200304		15.1772	2.81903	0.148217	-0.0134859		26.263	1.18487	-9.08508	-0.0412622		37.3197	2.81763	-0.0452884	-0.031606		48.4159	1.18638	-7.05058	-0.0388966		59.473	2.8167	0.0527418	-0.0123432		70.5293	1.18095	-6.14687	-0.00808092		81.6197	2.81622	-0.131109	0.0206326		92.676	1.18221	-5.75624	-0.0159238
1.03633	1.37766	-30.8396	-0.0448404		4.14055	1.18934	-10.5663	-0.0219172		15.2102	2.81309	0.0862467	-0.014333		26.2966	1.19091	-8.43223	-0.041394		37.3539	2.81148	-0.0733275	-0.0320075		48.4498	1.19249	-6.68245	-0.038947		59.5071	2.81056	0.0132742	-0.0128255		70.5617	1.18678	-6.21147	-0.00682452		81.6535	2.81013	-0.12181	0.0185839		92.7129	1.18886	-5.23578	-0.0135395
1.07071	1.37147	-29.6423	-0.0469209		4.17453	1.19546	-9.76845	-0.0234498		15.243	2.80719	0.0792192	-0.0150353		26.3289	1.19673	-8.90698	-0.0439013		37.3861	2.80568	-0.169725	-0.0311808		48.4827	1.19842	-6.94886	-0.0378544		59.5419	2.8043	0.0511802	-0.0138473		70.596	1.19296	-6.43109	-0.00590666		81.6871	2.80407	-0.094197	0.0144778		92.7407	1.19386	-5.46073	-0.0157136
1.10419	1.36545	-28.9672	-0.0462429		4.20831	1.20154	-9.75511	-0.0233759		15.2775	2.80097	0.127631	-0.0145701		26.3635	1.20296	-8.55433	-0.0457022		37.4223	2.79917	0.195138	-0.0321881		48.5172	1.20463	-6.66144	-0.0364832		59.5738	2.79857	0.102715	-0.0134895		70.6301	1.1991	-5.92604	-0.00492589		81.7199	2.79818	0.075386	0.0163187		92.7804	1.20102	-4.60763	-0.0188093
1.13695	1.35955	-28.7367	-0.0460779		4.24025	1.20729	-9.92142	-0.0244783		15.3099	2.79514	0.0555102	-0.0133797		26.3971	1.209	-8.11521	-0.0451383		37.4552	2.79324	0.0218634	-0.0306106		48.55	1.21052	-6.48149	-0.0360163		59.6058	2.79281	0.427613	-0.0134339		70.6626	1.20495	-6.13189	-0.00429161		81.7523	2.79235	-0.00951198	0.0132471		92.812	1.2067	-5.06896	-0.0198768
1.17011	1.35358	-28.0052	-0.0453009		4.27478	1.21351	-9.48416	-0.0262359		15.3421	2.78934	0.0461402	-0.0129384		26.4304	1.215	-8.11614	-0.0457496		37.4864	2.78761	0.112795	-0.0299739		48.5807	1.21605	-6.41243	-0.0333643		59.6411	2.78645	0.0277551	-0.0150208		70.6967	1.21109	-5.60994	-2.8468e-05		81.7865	2.78618	0.0727596	0.013318		92.8427	1.21223	-5.07876	-0.0206505
1.20441	1.34741	-28.2296	-0.0439283		4.30629	1.21918	-9.51362	-0.025861		15.3766	2.78313	-0.150062	-0.0129715		26.4639	1.22103	-8.29842	-0.0479538		37.5211	2.78138	0.0332919	-0.0302468		48.6174	1.22266	-6.03755	-0.0365421		59.6738	2.78056	-0.0214375	-0.0146864		70.7299	1.21707	-5.89019	-0.00437418		81.819	2.78034	-0.0909317	0.0142242		92.8763	1.21827	-4.92778	-0.019208
1.23805	1.34135	-27.9301	-0.0424323		4.34088	1.2254	-8.28394	-0.0256978		15.4086	2.77738	0.0512511	-0.0122488		26.4973	1.22705	-7.84313	-0.0473652		37.5561	2.77508	0.0663709	-0.0294575		48.6518	1.22885	-6.32135	-0.0353419		59.7038	2.77516	0.161988	-0.0146682		70.7636	1.22313	-5.43631	-0.00697826		81.8531	2.7742	0.014197	0.0165298		92.9099	1.22432	-4.92678	-0.0169712
1.27065	1.33549	-27.0426	-0.042242		4.37389	1.23135	-8.79333	-0.0262728		15.4432	2.77115	-0.0629637	-0.0131549		26.5288	1.23271	-7.82645	-0.0476808		37.5883	2.76928	0.0935582	-0.0283116		48.6833	1.23452	-5.76873	-0.0378045		59.741	2.76846	-0.0392547	-0.0132009		70.7958	1.22893	-5.68071	-0.00736737		81.8868	2.76812	-0.135439	0.0169892		92.9423	1.23015	-4.78666	-0.0169499
1.30374	1.32953	-27.1588	-0.0421353		4.40643	1.2372	-8.57356	-0.0253902		15.4772	2.76502	0.0547294	-0.0126283		26.5652	1.23926	-7.60071	-0.0483895		37.6267	2.76237	0.0225732	-0.0299251		48.7182	1.2408	-6.03379	-0.0369938		59.777	2.76199	0.0862467	-0.0141742		70.8307	1.23521	-5.3928	-0.00994565		81.9205	2.76206	0.177959	0.0191486		92.9751	1.23606	-4.83464	-0.0167348
1.33634	1.32366	-26.8213	-0.0433816		4.44005	1.24325	-8.05913	-0.0259487		15.5085	2.75938	-0.169583	-0.0135781		26.5937	1.2444	-7.65899	-0.0494902		37.6537	2.7575	-0.0796451	-0.0317161		48.7504	1.2466	-6.12558	-0.0385314		59.8061	2.75675	-0.0479148	-0.0149026		70.8654	1.24145	-5.33388	-0.0128584		81.9542	2.75599	0.0075244	0.0168611		93.0097	1.24229	-4.72022	-0.0195528
1.3706	1.31749	-26.4829	-0.0439273		4.47585	1.2497	-7.65388	-0.0258418		15.54	2.75372	-0.056646	-0.0125412		26.6313	1.25116	-6.79532	-0.0480488		37.6873	2.75146	0.0363443	-0.0301286		48.7821	1.25231	-6.06162	-0.0376426		59.8398	2.75068	-0.0651642	-0.0152152		70.8969	1.24712	-5.32799	-0.0119688		81.9878	2.74995	0.0797871	0.0174267		93.0437	1.24841	-4.4235	-0.0226707
1.40307	1.31165	-26.6886	-0.0450786		4.50857	1.25559	-7.33168	-0.0268596		15.5761	2.74722	-0.211819	-0.011585		26.6655	1.25731	-6.97427	-0.0477851		37.7208	2.74542	-0.099024	-0.0311535		48.8162	1.25844	-5.91369	-0.0388176		59.8741	2.7445	0.0496895	-0.014568		70.931	1.25325	-5.14847	-0.00963524		82.0201	2.74413	-0.136149	0.0186525		93.0765	1.25431	-4.33789	-0.0228329
1.43713	1.30552	-26.2526	-0.0445772		4.54187	1.26158	-7.10112	-0.0280002		15.6084	2.7414	-0.0830524	-0.0108452		26.6971	1.263	-6.93133	-0.0479367		37.7561	2.73907	-0.15134	-0.0322436		48.85	1.26453	-5.47528	-0.0383149		59.9093	2.73817	0.00482698	-0.0164313		70.9637	1.25914	-5.08643	-0.0114175		82.054	2.73803	0.0964686	0.0173774		93.1099	1.26032	-4.43613	-0.0228713
1.46964	1.29967	-26.407	-0.0437377		4.57245	1.26709	-7.04944	-0.0298485		15.6444	2.73492	-0.19315	-0.0108391		26.7304	1.26899	-7.23301	-0.0498076		37.7867	2.73357	-0.0680746	-0.0311788		48.8835	1.27055	-5.31479	-0.0388028		59.9412	2.73243	-0.121881	-0.0176777		70.9976	1.26525	-4.97001	-0.0107447		82.0856	2.73235	0.0217924	0.0189435		93.1421	1.26612	-4.57086	-0.0236879
1.50379	1.29352	-26.0772	-0.0431757		4.60969	1.27379	-6.57122	-0.0301269		15.6764	2.72917	-0.147152	-0.00874818		26.7637	1.27499	-6.8592	-0.0479456		37.8214	2.72732	0.0604792	-0.0296272		48.9166	1.27652	-5.18112	-0.040442		59.9764	2.72609	-0.0761669	-0.0189788		71.0315	1.27135	-4.60401	-0.0115179		82.1209	2.72599	0.0540195	0.0190979		93.177	1.27239	-4.1918	-0.0231029
1.53828	1.28731	-26.0806	-0.0410921		4.64357	1.27989	-6.56682	-0.032034		15.7148	2.72227	-0.0357764	-0.00790381		26.7974	1.28105	-6.84302	-0.05157		37.8545	2.72137	-0.0953328	-0.0315776		48.9511	1.28273	-4.93565	-0.0399432		60.0092	2.72018	0.0322982	-0.0194893		71.0657	1.27751	-4.52458	-0.0111509		82.1526	2.72028	0.0441526	0.0178402		93.2092	1.27819	-4.06864	-0.0229263
1.57005	1.28159	-25.8028	-0.0390846		4.67356	1.28528	-5.70598	-0.0335871		15.7423	2.71731	0.0623958	-0.00849549		26.83	1.28692	-6.48916	-0.0526106		37.8901	2.71496	-0.23063	-0.0316929		48.9827	1.28841	-5.25069	-0.0393289		60.0423	2.71423	-0.114783	-0.0189775		71.0966	1.28307	-4.40156	-0.0119642		82.1893	2.71368	-0.289903	0.0184913		93.2421	1.28411	-4.15439	-0.0223551
1.6059	1.27514	-26.3314	-0.0391825		4.70902	1.29167	-5.86776	-0.0331447		15.7862	2.7094	-0.0327241	-0.00900006		26.8641	1.29306	-6.61828	-0.0543715		37.92	2.70958	-0.207063	-0.0319749		49.0198	1.29509	-4.83684	-0.0395016		60.0743	2.70847	-0.244756	-0.0203957		71.1381	1.29054	-4.80831	-0.01147		82.2201	2.70813	0.051961	0.0197167		93.2778	1.29054	-3.60128	-0.0241072
1.63566	1.26978	-26.2085	-0.0398035		4.7419	1.29759	-5.43809	-0.0341036		15.8113	2.70489	-0.0743212	-0.00974008		26.8973	1.29904	-5.83894	-0.0554956		37.9563	2.70303	-0.0023425	-0.0309502		49.0529	1.30104	-5.03823	-0.0393742		60.1061	2.70275	-0.0630346	-0.0202626		71.1642	1.29524	-4.34442	-0.00875239		82.253	2.70222	-0.0536646	0.0163127		93.3101	1.29635	-3.60142	-0.0209014
1.67223	1.2632	-25.6207	-0.0380429		4.7754	1.30362	-5.63209	-0.035854		15.8434	2.69911	-0.332706	-0.0104238		26.93	1.30493	-5.92497	-0.0583569		37.9869	2.69753	-0.275209	-0.0305373		49.0874	1.30726	-4.51549	-0.0390032		60.1414	2.69639	0.130257	-0.0197125		71.1982	1.30135	-4.22027	-0.00879559		82.2885	2.69582	-0.238935	0.0151562		93.3439	1.30245	-3.72799	-0.0211697
1.70548	1.25722	-27.6684	-0.0394725		4.80873	1.30962	-5.38499	-0.0347599		15.8817	2.69221	0.0338598	-0.0114932		26.964	1.31105	-6.11684	-0.0582249		38.0207	2.69145	-0.269317	-0.0303274		49.1191	1.31297	-4.31205	-0.042781		60.1756	2.69023	-0.106619	-0.019932		71.2306	1.30719	-4.309	-0.0105272		82.3211	2.68995	-0.138208	0.0170551		93.3769	1.30838	-3.63663	-0.0236981
1.73793	1.25137	-27.7264	-0.039567		4.84258	1.31571	-5.1347	-0.0339262		15.9108	2.68698	-0.176043	-0.0110954		26.997	1.31698	-5.90098	-0.0611889		38.0559	2.68511	-0.0444366	-0.0293466		49.1514	1.31878	-4.54211	-0.0437945		60.2073	2.68453	-0.0689264	-0.0203622		71.266	1.31357	-3.61959	-0.0123056		82.354	2.68404	-0.0191659	0.0156455		93.4127	1.31483	-3.36199	-0.0221541
1.77157	1.24532	-27.8014	-0.0375773		4.87441	1.32144	-5.01885	-0.0356788		15.9435	2.6811	-0.0912866	-0.00882401		27.0316	1.32322	-5.73658	-0.0608998		38.0884	2.67926	0.0718368	-0.030118		49.1825	1.32437	-3.72494	-0.0465789		60.2421	2.67827	0.037622	-0.0207357		71.2979	1.3193	-3.71045	-0.015687		82.3877	2.67798	0.00837622	0.0141718		93.4419	1.32008	-3.3742	-0.0200117
1.80492	1.23932	-28.2277	-0.0382121		4.90992	1.32783	-3.93363	-0.0355613		15.9786	2.67477	-0.174126	-0.0089155		27.0648	1.3292	-5.24352	-0.0603537		38.1216	2.67328	-0.0311624	-0.0314918		49.2187	1.33089	-3.85562	-0.0479848		60.2751	2.67233	-0.274215	-0.0200781		71.3308	1.32522	-3.88068	-0.0167114		82.4212	2.67194	0.00851819	0.0147557		93.4781	1.3266	-3.46392	-0.0273102
1.8441	1.23226	-28.2545	-0.0384638		4.94254	1.3337	-4.51038	-0.0353245		16.0072	2.66963	-0.297214	-0.00924084		27.0983	1.33521	-5.39315	-0.060381		38.1543	2.6674	-0.0367702	-0.0323806		49.2505	1.33661	-3.67631	-0.0476314		60.3109	2.66589	-0.215155	-0.0196254		71.3634	1.3311	-3.9951	-0.018697		82.4552	2.66582	-0.336682	0.0165309		93.5111	1.33253	-3.23102	-0.0259546
1.87169	1.2273	-28.333	-0.0383255		4.97631	1.33978	-4.16767	-0.036924		16.0375	2.66417	-0.241917	-0.00741066		27.1313	1.34117	-5.3062	-0.0612518		38.1885	2.66124	-0.188607	-0.0309086		49.2814	1.34218	-3.82857	-0.0423547		60.3429	2.66012	-0.151837	-0.0167467		71.3968	1.33711	-3.72692	-0.0198749		82.4822	2.66096	-0.0971784	0.0134675		93.5445	1.33855	-3.13285	-0.0215207
1.90476	1.22135	-28.1278	-0.0380368		5.00911	1.34568	-4.35777	-0.0368172		16.078	2.65689	-0.0196628	-0.00623191		27.1658	1.34738	-4.9649	-0.0608044		38.2223	2.65516	-0.182218	-0.0323317		49.3178	1.34872	-3.93612	-0.0430273		60.3763	2.65411	-0.119397	-0.0181297		71.431	1.34325	-3.4295	-0.0204263		82.5212	2.65393	0.047063	0.0124334		93.5772	1.34443	-3.40408	-0.0233134
1.93856	1.21526	-28.4561	-0.0389772		5.04199	1.3516	-4.11997	-0.0362865		16.1137	2.65046	-0.32504	-0.00879916		27.1975	1.35307	-4.67649	-0.0599909		38.2555	2.64919	-0.317658	-0.0311014		49.3507	1.35465	-3.58126	-0.042547		60.4089	2.64825	-0.234037	-0.0163249		71.4644	1.34927	-3.63514	-0.0209931		82.5547	2.64791	-0.126069	0.0144152		93.6114	1.35059	-2.48135	-0.0245759
1.97165	1.2093	-28.2064	-0.0381858		5.07618	1.35776	-3.94889	-0.0364028		16.1444	2.64494	-0.140124	-0.00836908		27.2274	1.35845	-4.14155	-0.0604999		38.289	2.64316	-0.186194	-0.0329406		49.3839	1.36063	-3.46229	-0.0433414		60.4421	2.64226	-0.38055	-0.0138307		71.4988	1.35546	-2.88327	-0.0242417		82.5883	2.64187	-0.153469	0.0140275		93.6437	1.35641	-2.9003	-0.0223836
2.00457	1.20338	-28.1504	-0.03748		5.11036	1.36391	-4.00469	-0.0355987		16.1776	2.63895	-0.21402	-0.00756291		27.2654	1.3653	-4.07958	-0.0620848		38.3186	2.63783	-0.0316593	-0.0306607		49.4182	1.3668	-2.76387	-0.046339		60.4762	2.63613	0.00951198	-0.0139785		71.5341	1.36181	-3.14733	-0.0234902		82.623	2.63561	-0.304454	0.0123152		93.6784	1.36265	-2.87141	-0.0238389
2.03934	1.19712	-28.7813	-0.0364423		5.13888	1.36904	-3.71968	-0.0362467		16.2109	2.63296	-0.182786	-0.00757294		27.3001	1.37154	-3.92192	-0.0585787		38.3548	2.63131	-0.0682875	-0.031005		49.4513	1.37276	-3.201	-0.0492437		60.5099	2.63006	-0.182928	-0.0155669		71.565	1.36738	-2.93196	-0.0219129		82.6556	2.62975	-0.107471	0.0123126		93.7123	1.36874	-2.35351	-0.0276738
2.07089	1.19144	-28.3586	-0.035926		5.17592	1.37571	-3.49175	-0.0368376		16.2518	2.6256	-0.280249	-0.00850486		27.3303	1.37699	-3.77541	-0.0576426		38.3884	2.62525	-0.348039	-0.031131		49.4838	1.37861	-3.07777	-0.0514902		60.5399	2.62467	-0.134587	-0.0163705		71.5993	1.37356	-2.43784	-0.0199592		82.6884	2.62384	-0.279042	0.0128278		93.7439	1.37445	-2.58797	-0.0304013
2.10495	1.18531	-28.8288	-0.0342208		5.20945	1.38175	-3.54428	-0.038734		16.2848	2.61965	-0.10016	-0.00694312		27.3603	1.38238	-3.60696	-0.0587087		38.4246	2.61874	0.0257675	-0.029425		49.5184	1.38484	-2.96256	-0.0510788		60.5763	2.61811	-0.0971784	-0.0163063		71.6303	1.37914	-2.32838	-0.0182216		82.7227	2.61767	-0.383532	0.0102698		93.7776	1.3805	-2.32036	-0.0283601
2.14574	1.17797	-29.1399	-0.0317234		5.24155	1.38752	-3.52185	-0.0378435		16.3108	2.61499	-0.0193079	-0.00564982		27.3987	1.3893	-3.53335	-0.0577296		38.4554	2.61321	-0.128412	-0.0291909		49.5515	1.3908	-2.64419	-0.0539718		60.6109	2.61189	-0.365927	-0.0167429		71.6667	1.38569	-2.19635	-0.0188421		82.7558	2.61171	-0.0326531	0.0100042		93.8103	1.38639	-2.36976	-0.0254308
2.17003	1.1736	-28.9874	-0.0297251		5.27749	1.39399	-2.9693	-0.0380483		16.345	2.60882	-0.23134	-0.00853186		27.4317	1.39523	-3.54634	-0.0590844		38.4884	2.60726	-0.155102	-0.03064		49.5827	1.39641	-2.76117	-0.0535166		60.6444	2.60586	-0.32071	-0.0171377		71.6983	1.39137	-2.18946	-0.0173915		82.789	2.60573	-0.262076	0.0114827		93.8443	1.39251	-1.96465	-0.0242091
2.20462	1.16737	-29.0008	-0.0279759		5.31023	1.39989	-2.66804	-0.0373909		16.3776	2.60296	-0.118545	-0.00911713		27.4662	1.40144	-2.94438	-0.0623925		38.5217	2.60127	-0.0716948	-0.0295205		49.6182	1.40281	-2.31745	-0.0550989		60.6768	2.60002	-0.178811	-0.0159631		71.732	1.39744	-2.15461	-0.0183984		82.8224	2.59972	-0.0652352	0.0120201		93.8777	1.39853	-1.4701	-0.0214496
2.23783	1.16139	-29.5546	-0.0271525		5.34602	1.40633	-2.85608	-0.0389911		16.4126	2.59666	-0.107116	-0.00948912		27.4993	1.40741	-3.12724	-0.064007		38.5566	2.59499	-0.123443	-0.028359		49.6509	1.40869	-2.3452	-0.0547305		60.7107	2.59393	-0.216149	-0.0129662		71.765	1.40337	-2.14332	-0.0201891		82.8563	2.59362	-0.256043	0.0127136		93.912	1.40469	-1.59659	-0.0217478
2.27275	1.15511	-29.9818	-0.0268622		5.37702	1.41191	-2.42996	-0.0386798		16.4445	2.59091	-0.277764	-0.0102231		27.532	1.41329	-2.61402	-0.0638138		38.5896	2.58905	-0.287702	-0.0302323		49.6876	1.41529	-1.6866	-0.0552368		60.7438	2.58796	-0.177533	-0.0138218		71.7994	1.40957	-2.13402	-0.0212227		82.8899	2.58758	-0.243549	0.0132525		93.9444	1.41054	-1.55052	-0.0275082
2.30642	1.14905	-29.8528	-0.0267393		5.41022	1.41788	-2.50598	-0.0408357		16.4785	2.5848	-0.229849	-0.0125406		27.564	1.41905	-2.86389	-0.067019		38.6225	2.58312	-0.227791	-0.0307886		49.7175	1.42068	-1.71954	-0.0523394		60.7766	2.58205	-0.51244	-0.0142214		71.8331	1.41563	-1.70761	-0.0203122		82.9221	2.58177	-0.14559	0.0143911		93.9781	1.4166	-1.23883	-0.0304881
2.34054	1.1429	-30.2214	-0.027925		5.44514	1.42417	-2.29729	-0.0431098		16.5126	2.57866	-0.23567	-0.00981116		27.5996	1.42545	-2.57257	-0.0634103		38.6567	2.57696	-0.110169	-0.0315027		49.7511	1.42672	-1.70144	-0.0521761		60.8153	2.57509	-0.186832	-0.0136536		71.8651	1.42139	-1.59141	-0.0254341		82.9562	2.57563	-0.358971	0.0134371		94.0137	1.42301	-1.29029	-0.0348257
2.37321	1.13702	-31.0805	-0.0291295		5.47715	1.42993	-2.34705	-0.0450423		16.5464	2.57257	-0.425626	-0.0101385		27.6295	1.43084	-2.36266	-0.0627291		38.6901	2.57096	-0.249512	-0.0324028		49.786	1.43301	-1.35312	-0.0497382		60.844	2.56993	-0.288199	-0.0175231		71.9001	1.4277	-1.28838	-0.0269357		82.9893	2.56968	-0.238367	0.0134662		94.0464	1.42889	-1.1572	-0.0363162
2.40532	1.13124	-30.7941	-0.02733		5.51381	1.43653	-1.7781	-0.0440186		16.5819	2.56617	-0.148997	-0.00932649		27.6649	1.43721	-2.0712	-0.0623025		38.7231	2.56502	-0.303248	-0.0333978		49.8204	1.43919	-1.32515	-0.050417		60.8769	2.564	-0.457072	-0.0173952		71.9329	1.4336	-1.00046	-0.0287856		83.0308	2.56222	-0.327879	0.0108391		94.0793	1.43482	-1.11397	-0.0360112
2.44525	1.12406	-31.1635	-0.0281375		5.54452	1.44206	-1.84504	-0.0438659		16.6129	2.56059	-0.460337	-0.00821921		27.7003	1.44358	-1.05704	-0.0630682		38.7543	2.55939	-0.565395	-0.034333		49.8525	1.44497	-1.20192	-0.0509276		60.9097	2.5581	-0.384384	-0.0165347		71.9669	1.43972	-1.018	-0.0310499		83.055	2.55786	-0.274215	0.0100127		94.1153	1.4413	-0.908323	-0.0370775
2.47792	1.11818	-31.3357	-0.0283469		5.576	1.44772	-1.49516	-0.0448834		16.644	2.555	-0.296646	-0.00657615		27.7332	1.44949	-1.59979	-0.0597005		38.7903	2.55292	-0.371606	-0.0320541		49.8856	1.45093	-1.21164	-0.0516316		60.9436	2.552	-0.160923	-0.0182259		71.999	1.44551	-1.07052	-0.0325317		83.0912	2.55134	-0.094126	0.00676601		94.1455	1.44673	-1.01274	-0.034908
2.50664	1.11301	-31.688	-0.027228		5.60795	1.45348	-1.43425	-0.04441		16.6797	2.54858	-0.263283	-0.00721444		27.7631	1.45489	-1.53725	-0.0626616		38.824	2.54686	-0.12252	-0.0314233		49.9197	1.45708	-0.898528	-0.0513924		60.9767	2.54603	-0.181083	-0.0168738		72.0324	1.45152	-0.903709	-0.0314794		83.1223	2.54575	-0.239432	0.00605749		94.1792	1.45279	-0.527844	-0.0342763
2.54001	1.107	-31.5896	-0.0263057		5.64295	1.45978	-1.15897	-0.0447126		16.7122	2.54273	-0.251855	-0.00731973		27.8001	1.46154	-0.918687	-0.0635568		38.8565	2.541	-0.326034	-0.0309831		49.953	1.46306	-0.743851	-0.0529486		61.0077	2.54046	-0.135226	-0.0149023		72.0658	1.45752	-0.805821	-0.0318895		83.1564	2.53961	-0.293949	0.00836301		94.2132	1.45891	-0.26811	-0.0340179
2.57398	1.10089	-31.8354	-0.0273547		5.67625	1.46577	-1.0679	-0.0476602		16.7458	2.53667	-0.199894	-0.00679167		27.8343	1.46769	-0.975404	-0.0649767		38.89	2.53498	-0.555954	-0.0300494		49.9851	1.46885	-0.409725	-0.0510289		61.0443	2.53387	-0.434215	-0.0154141		72.0999	1.46366	0.019095	-0.0317723		83.1967	2.53235	-0.226797	0.00771928		94.246	1.46482	-0.177533	-0.0334631
2.59952	1.09629	-32.0826	-0.026723		5.71023	1.47189	-0.971855	-0.0476085		16.7779	2.53091	-0.103141	-0.00678863		27.8666	1.47351	-0.548714	-0.0664498		38.9232	2.529	-0.321278	-0.0281842		50.0204	1.47519	-0.100941	-0.0519183		61.0769	2.528	-0.557516	-0.0142678		72.1333	1.46968	0.105555	-0.0285445		83.2213	2.52792	-0.52898	0.00843742		94.2832	1.47152	0.0726886	-0.0275267
2.64049	1.08891	-32.7082	-0.0269244		5.74326	1.47783	-0.362378	-0.0462397		16.8127	2.52464	-0.442875	-0.00624335		27.901	1.47971	-0.525715	-0.0670507		38.956	2.5231	-0.293381	-0.0328136		50.0514	1.48078	-0.0326531	-0.0510883		61.1104	2.52197	-0.382041	-0.0131071		72.1665	1.47564	0.145022	-0.0293075		83.2549	2.52188	-0.140337	0.0102361		94.3123	1.47676	0.114073	-0.029371
2.67422	1.08284	-32.3494	-0.0267512		5.77638	1.48379	-0.326886	-0.0481836		16.8408	2.51957	-0.169441	-0.00669309		27.9354	1.4859	-0.422928	-0.0651977		38.9902	2.51695	-0.323904	-0.0353939		50.0866	1.48712	0.263709	-0.0504562		61.1436	2.516	-0.387649	-0.0130826		72.202	1.48204	0.473115	-0.0309854		83.2898	2.51559	-0.449406	0.011208		94.3454	1.48271	0.224596	-0.034168
2.70654	1.07702	-32.5485	-0.0254637		5.80817	1.48952	-0.0165395	-0.0493918		16.8788	2.51274	-0.377569	-0.00564602		27.9657	1.49135	0.0589885	-0.0663867		39.0233	2.51097	-0.480213	-0.0373283		50.1197	1.49308	0.107045	-0.0520783		61.1767	2.51004	-0.217001	-0.0116574		72.2334	1.48769	0.460905	-0.0305283		83.3229	2.50963	-0.437906	0.0102052		94.3769	1.48838	0.218279	-0.0382773
2.73987	1.07103	-32.7191	-0.0252594		5.84408	1.49598	-0.112937	-0.0467925		16.9123	2.5067	-0.474179	-0.00726612		27.9999	1.4975	0.0637445	-0.0641478		39.0577	2.50478	-0.245821	-0.0358734		50.1538	1.49921	0.620834	-0.0528144		61.2085	2.50432	-0.31347	-0.00992058		72.2678	1.49389	0.524082	-0.0303331		83.3575	2.5034	-0.502999	0.0104651		94.4148	1.4952	0.449477	-0.0397739
2.77453	1.06479	-33.2931	-0.0236683		5.87892	1.50225	0.170719	-0.0482351		16.9467	2.50052	-0.399077	-0.00594184		28.0332	1.5035	0.333558	-0.0626635		39.091	2.4988	-0.432156	-0.0376092		50.1864	1.50507	0.876806	-0.0530935		61.2457	2.49761	-0.29906	-0.00901797		72.2944	1.49867	0.516132	-0.0323561		83.3902	2.49753	-0.225803	0.0103143		94.4465	1.50091	1.36667	-0.0455623
2.80706	1.05893	-33.7804	-0.0220637		5.90952	1.50776	0.700621	-0.0493439		16.9772	2.49502	-0.386513	-0.00513944		28.0676	1.50969	1.19652	-0.0646517		39.1237	2.4929	-0.301189	-0.0351632		50.2196	1.51105	0.930613	-0.0560629		61.2781	2.49179	-0.296362	-0.00742846		72.3342	1.50584	0.945874	-0.0330509		83.425	2.49126	-0.486034	0.0121399		94.4792	1.50679	1.49331	-0.045369
2.83956	1.05308	-33.2912	-0.022056		5.94518	1.51418	0.809228	-0.0473728		17.0112	2.48891	-0.32866	-0.00374086		28.1003	1.51558	1.30002	-0.0671779		39.1591	2.48654	-0.464029	-0.0335278		50.2541	1.51726	1.72564	-0.0610631		61.3124	2.48561	-0.392476	-0.00848747		72.368	1.51192	1.16628	-0.030773		83.4542	2.486	-0.264561	0.0117288		94.5115	1.51261	1.65665	-0.0408112
2.8734	1.04699	-34.0976	-0.0216362		5.97835	1.52015	1.38371	-0.046193		17.0462	2.48261	-0.781118	-0.00449784		28.1338	1.5216	1.64394	-0.0680034		39.1905	2.48089	-0.40362	-0.0321438		50.2864	1.52307	1.83099	-0.0597183		61.3463	2.4795	-0.389707	-0.00715956		72.4021	1.51805	1.37107	-0.0321478		83.49	2.47955	-0.503141	0.0101215		94.5459	1.51881	1.7167	-0.039872
2.90687	1.04097	-34.033	-0.020686		6.00717	1.52534	1.64167	-0.0488621		17.0857	2.47549	-0.405182	-0.00278998		28.1675	1.52768	2.02385	-0.0702		39.223	2.47502	-0.291038	-0.0334638		50.3192	1.52898	2.41874	-0.0627394		61.3772	2.47395	-0.382538	-0.00988429		72.4332	1.52365	2.40206	-0.03101		83.5228	2.47365	-0.142183	0.0091009		94.579	1.52476	2.17746	-0.0421843
2.93822	1.03532	-34.3198	-0.0201915		6.04334	1.53185	2.21906	-0.0485385		17.1121	2.47075	-0.399006	-0.0043485		28.1994	1.53341	2.17115	-0.0710217		39.2585	2.46864	-0.311553	-0.0333567		50.3534	1.53514	3.07798	-0.0602885		61.4121	2.46767	-0.427187	-0.0120463		72.4685	1.53001	2.68394	-0.0311917		83.5566	2.46757	-0.191659	0.0117355		94.6136	1.53098	2.51862	-0.0403859
2.97316	1.02903	-34.7492	-0.0180502		6.08155	1.53872	3.20575	-0.0495686		17.1476	2.46436	-0.566957	-0.00644918		28.2332	1.53951	2.94595	-0.0724552		39.292	2.46261	-0.257888	-0.0317471		50.3864	1.54107	3.39649	-0.0615212		61.4451	2.46172	-0.255759	-0.0129424		72.5032	1.53626	3.01608	-0.0291333		83.5892	2.46171	-0.229494	0.0114187		94.6453	1.53669	3.269	-0.043328
3.00801	1.02276	-35.438	-0.0167235		6.11081	1.54399	3.59241	-0.0511994		17.1809	2.45837	-0.551695	-0.00641372		28.2659	1.54539	3.73764	-0.0716708		39.3251	2.45666	-0.311411	-0.0310005		50.4168	1.54655	4.31248	-0.0611564		61.4788	2.45566	-0.519397	-0.0147618		72.5347	1.54193	3.75496	-0.0299819		83.6236	2.45551	-0.369548	0.011659		94.676	1.54222	4.62155	-0.0430934
3.0414	1.01675	-34.8308	-0.0169518		6.14488	1.55012	4.80355	-0.0510847		17.2179	2.45171	-0.433008	-0.00622267		28.2995	1.55143	5.11652	-0.0706196		39.3579	2.45075	-0.365289	-0.0311786		50.4505	1.55262	5.55102	-0.0621262		61.5118	2.44972	-0.33221	-0.0161376		72.5671	1.54776	4.80022	-0.0292819		83.6577	2.44937	-0.384384	0.00908015		94.7128	1.54883	4.99564	-0.041403
3.07509	1.01069	-35.2014	-0.0165133		6.17895	1.55626	5.79259	-0.0505855		17.2471	2.44645	-0.440462	-0.00722994		28.3341	1.55767	6.42556	-0.07218		39.39	2.44497	-0.466797	-0.0320148		50.4882	1.55939	6.66811	-0.0592108		61.5447	2.44381	-0.569157	-0.0169525		72.5998	1.55365	5.55053	-0.0306796		83.6906	2.44344	-0.289903	0.0106832		94.7452	1.55468	6.06403	-0.0394399
3.1068	1.00498	-34.6769	-0.0200411		6.20653	1.56122	7.25629	-0.0507232		17.2794	2.44063	-0.609974	-0.00840582		28.3658	1.56338	7.91617	-0.072629		39.4251	2.43866	-0.337746	-0.0318542		50.5212	1.56534	8.19784	-0.06409		61.5781	2.43778	-0.351163	-0.0152825		72.6345	1.55988	6.79901	-0.0304422		83.7241	2.43742	-0.39134	0.00801715		94.7813	1.56117	7.62499	-0.0411602
					6.24538	1.56821	9.09658	-0.0498776		17.3144	2.43433	-0.399503	-0.00785642		28.3982	1.5692	10.0582	-0.071749		39.458	2.43273	-0.500586	-0.0325396		50.5551	1.57145	11.3072	-0.0630793		61.6144	2.43124	-0.535085	-0.0185898		72.6678	1.56588	8.97995	-0.0305295		83.7577	2.43136	-0.437125	0.00637701		94.8136	1.56698	9.18694	-0.0401915
					6.2787	1.57421	16.0551	-0.0503062		17.3462	2.42861	-0.584632	-0.00731201		28.4346	1.57575	19.6772	-0.0710959		39.4914	2.42671	-0.369051	-0.0323751		50.5881	1.57739	22.9902	-0.0586916		61.6456	2.42564	-0.413487	-0.0170129		72.701	1.57187	12.6335	-0.0280409		83.79	2.42555	-0.293381	0.00678067		94.8485	1.57327	14.0957	-0.0453907
					6.31219	1.58024	28.6129	-0.0508553		17.3794	2.42263	-0.547081	-0.00674688		28.4667	1.58153	32.6847	-0.0709006		39.5249	2.42069	-0.477161	-0.0336437		50.6205	1.58321	36.1816	-0.0571329		61.6784	2.41973	-0.456646	-0.0180101		72.7359	1.57813	23.4268	-0.0296913		83.8237	2.41949	-0.389281	0.00957638		94.8775	1.57849	25.4897	-0.0472886
					6.34538	1.58621	43.1624	-0.0493128		17.4142	2.41637	-0.445644	-0.0059088		28.5016	1.58782	46.5309	-0.0696397		39.5588	2.4146	-0.691109	-0.0326871		50.6532	1.58911	48.9896	-0.0573181		61.7121	2.41367	-0.445431	-0.0153601		72.7688	1.58406	36.3382	-0.0299237		83.8581	2.4133	-0.357977	0.0129156		94.9138	1.58503	38.683	-0.0516325
					6.37853	1.59218	56.6186	-0.0480913		17.4454	2.41074	-0.532813	-0.00497621		28.5345	1.59373	59.4744	-0.0667192		39.5928	2.40847	-0.592369	-0.0320235		50.6881	1.59539	61.4444	-0.0531906		61.745	2.40775	-0.556167	-0.016124		72.801	1.58985	49.4432	-0.0288736		83.8902	2.40752	-0.532032	0.0135975		94.9476	1.59111	50.7423	-0.0490084
					6.41199	1.5982	69.4335	-0.0467677		17.4806	2.40442	-0.594073	-0.00368385		28.568	1.59977	71.7622	-0.0674889		39.6244	2.40278	-0.545803	-0.0314221		50.721	1.6013	73.8853	-0.0519443		61.7784	2.40173	-0.330364	-0.0134073		72.8335	1.59571	61.6158	-0.0302004		83.9262	2.40104	-0.405182	0.0123878		94.9785	1.59666	62.3008	-0.049121
					6.44988	1.60502	82.3719	-0.043417		17.5155	2.39814	-0.441171	-0.00414745		28.5969	1.60496	84.402	-0.0679448		39.6611	2.39618	-0.813984	-0.0321841		50.7543	1.6073	85.3931	-0.0514758		61.8118	2.39571	-0.636238	-0.0130828		72.8633	1.60108	73.4113	-0.0294813		83.9594	2.39505	-0.249157	0.0131013		95.0126	1.60281	74.5212	-0.0433977
					6.4774	1.60998	95.1029	-0.0409707		17.5445	2.39291	-0.584632	-0.00407467		28.6357	1.61195	96.7517	-0.0663621		39.6924	2.39054	-0.454588	-0.0296499		50.7873	1.61324	96.8619	-0.0503808		61.8459	2.38958	-0.404401	-0.0128792		72.9044	1.60847	85.4988	-0.0284721		83.9914	2.3893	-0.343496	0.0136606		95.047	1.609	86.2701	-0.0401886
					6.51002	1.61585	107.427	-0.0387864		17.5802	2.38649	-0.514002	-0.00383209		28.6686	1.61788	108.323	-0.0657761		39.7253	2.38462	-0.430595	-0.0290037		50.8223	1.61954	107.332	-0.0495865		61.8817	2.38313	-0.747543	-0.0153204		72.9363	1.61421	96.5419	-0.0275331		84.025	2.38325	-0.363301	0.00863769		95.0807	1.61507	96.6735	-0.0359685
					6.54603	1.62233	119.074	-0.0373334		17.6135	2.38049	-0.399929	-0.00294488		28.7024	1.62396	119.242	-0.0667621		39.7578	2.37877	-0.473328	-0.029569		50.8546	1.62536	118.242	-0.0466956		61.9123	2.37764	-0.625874	-0.0154542		72.9682	1.61996	106.984	-0.0282643		84.0583	2.37727	-0.378705	0.00960977		95.1136	1.62099	106.663	-0.0375332
					6.57877	1.62822	130.745	-0.0349193		17.648	2.37428	-0.781331	-0.00450985		28.7353	1.62989	129.94	-0.0613685		39.79	2.37297	-0.303816	-0.0297821		50.8891	1.63157	127.908	-0.0444862		61.9449	2.37176	-0.429388	-0.0149998		73.002	1.62604	117.577	-0.0266828		84.0919	2.37121	-0.512156	0.0101375		95.148	1.62718	116.463	-0.0360969
					6.61394	1.63455	141.18	-0.0312829		17.6818	2.36821	-0.531393	-0.00506019		28.7693	1.63599	139.411	-0.058563		39.8248	2.36671	-0.523443	-0.03027		50.9215	1.6374	136.971	-0.0423195		61.9809	2.36529	-0.613168	-0.0132604		73.0351	1.63201	126.604	-0.0283584		84.1252	2.36523	-0.456717	0.010689		95.1806	1.63305	125.485	-0.0335035
					6.64637	1.64039	150.213	-0.0267255		17.7094	2.36323	-0.68323	-0.00691212		28.801	1.6417	148.04	-0.0560139		39.8582	2.36069	-0.541331	-0.0317587		50.9542	1.64329	144.926	-0.0394189		62.0138	2.35935	-0.495333	-0.0117129		73.0691	1.63811	135.053	-0.0263369		84.1593	2.35909	-0.417463	0.0119744		95.2141	1.63908	133.579	-0.0331938
					6.67994	1.64643	159.345	-0.0218326		17.748	2.35628	-0.628004	-0.00823208		28.8353	1.64788	155.377	-0.0505242		39.8919	2.35463	-0.417108	-0.0339148		50.987	1.64918	152.146	-0.0356186		62.0464	2.35349	-0.38126	-0.0102138		73.1017	1.64399	142.492	-0.0236982		84.193	2.35302	-0.647028	0.0140518		95.2461	1.64484	140.894	-0.0300774
					6.71349	1.65247	165.962	-0.0162078		17.7804	2.35045	-0.651642	-0.00917155		28.8688	1.65391	162.43	-0.0464761		39.9252	2.34863	-0.604579	-0.0331058		51.0207	1.65525	158.014	-0.0317197		62.0802	2.34741	-0.671234	-0.00781628		73.1358	1.65012	149.27	-0.0203429		84.2254	2.34718	-0.423354	0.0143314		95.2818	1.65126	147.748	-0.0261546
					6.74842	1.65876	172.024	-0.0118667		17.8157	2.3441	-0.723834	-0.00922954		28.9032	1.6601	167.472	-0.0447921		39.9607	2.34224	-0.514002	-0.0321732		51.053	1.66106	163.14	-0.0286638		62.1145	2.34123	-0.575191	-0.00815425		73.1663	1.65561	155.191	-0.016517		84.257	2.3415	-0.557516	0.0151549		95.3093	1.65622	152.974	-0.0192033
					6.78036	1.66451	176.923	-0.0104587		17.8495	2.33802	-0.65725	-0.00802728		28.9349	1.66581	171.905	-0.0423321		39.9893	2.33711	-0.61906	-0.0337981		51.0857	1.66695	167.477	-0.0253463		62.1461	2.33554	-0.436841	-0.00960335		73.2008	1.66182	160.203	-0.0138959		84.2915	2.33529	-0.66662	0.0143195		95.3474	1.66307	157.154	-0.0197307
					6.816	1.67092	179.994	-0.00811636		17.8819	2.33217	-0.787365	-0.00602493		28.9688	1.6719	174.803	-0.0394568		40.0297	2.32983	-0.60394	-0.0329179		51.1217	1.67343	170.129	-0.0228841		62.1803	2.32939	-0.559929	-0.0127645		73.2344	1.66788	163.741	-0.00882333		84.3256	2.32915	-0.985981	0.0131307		95.3808	1.66908	161.154	-0.0187319
					6.84628	1.67637	182.195	-0.00718636		17.9158	2.32608	-0.742645	-0.00587542		29.0042	1.67829	176.593	-0.037409		40.0599	2.32439	-0.475741	-0.0310082		51.1555	1.67951	171.652	-0.0205197		62.214	2.32333	-0.569938	-0.0156215		73.2696	1.67421	166.666	-0.0038894		84.3582	2.32328	-0.590879	0.0129949		95.417	1.67561	163.65	-0.0172157
					6.87934	1.68233	182.429	-0.00616384		17.9485	2.3202	-0.637019	-0.00604684		29.0336	1.68358	178.413	-0.0327983		40.0926	2.3185	-0.527702	-0.0329296		51.1896	1.68565	172.978	-0.0192001		62.2468	2.31742	-0.493984	-0.0173452		73.303	1.68021	168.492	-0.00300682		84.3923	2.31714	-0.54559	0.0121033		95.449	1.68135	165.165	-0.0144548
					6.91349	1.68847	180.95	-0.00616741		17.985	2.31363	-0.894055	-0.00666241		29.0686	1.68987	176.723	-0.0281459		40.1259	2.31252	-0.608696	-0.034101		51.2246	1.69196	171.493	-0.0157041		62.2801	2.31143	-0.710062	-0.0184691		73.3363	1.68621	169.527	-0.000396259		84.4242	2.31139	-0.576682	0.0110911		95.4825	1.68739	165.314	-0.0172561
					6.95085	1.6952	175.755	-0.00449219		18.011	2.30894	-0.910169	-0.00713388		29.1019	1.69586	173.151	-0.0238127		40.1593	2.30651	-0.638368	-0.0339229		51.256	1.6976	169.891	-0.0141633		62.3129	2.30552	-0.49874	-0.019004		73.3691	1.69212	168.785	0.00521876		84.4623	2.30455	-0.493274	0.0103169		95.5147	1.69318	164.89	-0.013183
					6.98137	1.70069	165.607	-0.00326582		18.049	2.30211	-0.718297	-0.006742		29.1371	1.7022	164.346	-0.0202365		40.1926	2.30051	-0.898173	-0.0367836		51.2906	1.70383	162.692	-0.0135244		62.3457	2.29961	-0.755706	-0.0165762		73.4043	1.69846	165.714	0.00634784		84.492	2.29919	-0.776291	0.00870115		95.5489	1.69933	162.816	-0.0072704
					7.01378	1.70652	144.526	-0.0027675		18.0826	2.29605	-0.597977	-0.00712665		29.1695	1.70803	147.357	-0.0181621		40.2271	2.29429	-0.76898	-0.0393116		51.3216	1.70942	148.421	-0.0128363		62.3797	2.29349	-0.612671	-0.0120916		73.4346	1.70391	159.816	0.00686314		84.5258	2.29312	-0.659734	0.00794081		95.5814	1.70519	158.126	-0.00555384
					7.04604	1.71233	110.889	-0.00170705		18.1165	2.28995	-0.788004	-0.00818781		29.2027	1.714	118.504	-0.0170263		40.2595	2.28847	-0.825697	-0.0376643		51.3555	1.71552	123.862	-0.0136632		62.4128	2.28755	-0.74449	-0.0113631		73.4709	1.71044	148.749	0.0111057		84.5589	2.28715	-0.801207	0.0077635		95.6156	1.71134	149.202	-0.0034193
					7.07719	1.71794	65.2934	-0.00274043		18.1465	2.28455	-0.630417	-0.00686218		29.2366	1.72012	78.2558	-0.0179634		40.2922	2.28258	-0.517267	-0.0373198		51.3885	1.72145	87.9872	-0.0148302		62.4461	2.28155	-0.685928	-0.0118778		73.503	1.71621	128.966	0.0103344		84.592	2.28119	-0.681668	0.00751074		95.6487	1.71731	132.554	0.000898986
					7.1188	1.72543	41.7198	-0.00389683		18.1823	2.27811	-0.762236	-0.00581685		29.2687	1.7259	47.4907	-0.020211		40.3255	2.27659	-0.704171	-0.0347649		51.423	1.72766	53.0427	-0.0159265		62.4805	2.27536	-0.597764	-0.0118419		73.5356	1.72209	98.0919	0.0122932		84.6242	2.27539	-0.616575	0.00805417		95.6804	1.72301	104.982	0.00115893
					7.14216	1.72963	33.3029	-0.0030873		18.216	2.27204	-0.846141	-0.00634701		29.3052	1.73247	37.2014	-0.0223036		40.3601	2.27036	-0.76756	-0.0344843		51.4568	1.73375	39.5112	-0.0175444		62.5137	2.26937	-0.652565	-0.012192		73.5705	1.72837	60.6073	0.00999511		84.6611	2.26876	-0.452458	0.00713013		95.7155	1.72932	69.7003	0.000115437
					7.1807	1.73657	28.4056	-0.00495747		18.2495	2.26601	-1.06293	-0.00574833		29.3404	1.7388	32.9296	-0.0243835		40.3937	2.26431	-0.626584	-0.0334164		51.4895	1.73963	33.4181	-0.0159403		62.5457	2.26361	-0.797729	-0.0125308		73.6035	1.73431	40.1538	0.00700048		84.6947	2.26271	-0.582148	0.00892022		95.7488	1.73533	44.2162	-0.000527758
					7.2138	1.74253	24.7348	-0.00938252		18.2828	2.26003	-0.72504	-0.00347397		29.3701	1.74414	28.8258	-0.0278077		40.4267	2.25836	-1.06144	-0.0348335		51.5258	1.74618	29.9145	-0.0172788		62.5804	2.25737	-0.611038	-0.0125086		73.6384	1.7406	33.1361	0.00345051		84.7261	2.25706	-0.879717	0.00938137		95.7821	1.74131	34.9834	-0.00193558
					7.24815	1.74871	22.5339	-0.00889975		18.3156	2.25412	-0.706939	-0.00421938		29.4029	1.75005	25.8157	-0.0313851		40.4598	2.25241	-0.683017	-0.0341929		51.5561	1.75162	26.6004	-0.0179735		62.6128	2.25154	-0.660586	-0.0114306		73.6716	1.74656	29.4034	0.0037305		84.7604	2.25088	-0.597409	0.0106894		95.8156	1.74734	30.5431	-0.00498099
					7.282	1.7548	21.0078	-0.00890841		18.3484	2.24821	-0.916771	-0.00523079		29.4359	1.75599	23.4705	-0.030606		40.4941	2.24624	-0.843656	-0.0343328		51.5893	1.7576	24.1405	-0.0194069		62.6455	2.24565	-0.638723	-0.00966903		73.7038	1.75236	26.5793	-0.00101138		84.7932	2.24497	-0.795812	0.0102269		95.8502	1.75357	28.0811	-0.00250681
					7.32142	1.7619	20.2673	-0.0120029		18.3818	2.2422	-0.943319	-0.00470414		29.4709	1.76229	22.9628	-0.0319233		40.5268	2.24035	-0.708501	-0.0330036		51.6223	1.76355	22.3538	-0.0200063		62.6808	2.23931	-0.895901	-0.0108528		73.736	1.75816	23.2689	0.000879123		84.828	2.23871	-0.742787	0.012087		95.8826	1.7594	25.221	-0.00355989
					7.34977	1.767	19.6021	-0.0108212		18.4189	2.23552	-0.972281	-0.00413912		29.5032	1.7681	22.1575	-0.0295119		40.5598	2.23442	-0.878581	-0.0329474		51.656	1.7696	22.1062	-0.0215594		62.7147	2.23319	-0.799291	-0.0127591		73.7706	1.76438	21.6835	0.000273614		84.8604	2.23287	-0.903922	0.0112646		95.9154	1.76532	23.1361	-0.00370467
					7.38064	1.77256	18.9136	-0.00831449		18.4488	2.23014	-1.09523	-0.00416953		29.537	1.77419	21.5435	-0.0294339		40.5943	2.2282	-0.782822	-0.0314067		51.6889	1.77552	21.2589	-0.0222693		62.7471	2.22736	-0.898599	-0.0137443		73.8019	1.77003	20.303	-0.000930985		84.8933	2.22696	-0.774517	0.00908754		95.9486	1.77129	21.4263	-0.00494943
					7.41524	1.77879	19.0279	-0.00914928		18.4841	2.22379	-0.8526	-0.00336582		29.5709	1.78029	20.9817	-0.025908		40.6282	2.22209	-0.751163	-0.0316391		51.7228	1.78163	20.5325	-0.0231989		62.7807	2.22132	-0.971429	-0.0144723		73.8367	1.77628	20.3041	-0.00252191		84.9271	2.22088	-0.681243	0.0099831		95.9812	1.77716	20.4828	-0.00412034
					7.44676	1.78446	18.6776	-0.00976538		18.5162	2.218	-0.90378	-0.00550765		29.6034	1.78614	20.5076	-0.0276468		40.6613	2.21614	-0.966247	-0.0336321		51.7556	1.78754	20.0947	-0.0209238		62.815	2.21514	-0.687347	-0.0162009		73.8696	1.7822	19.8097	-0.00382475		84.96	2.21495	-0.757764	0.00967073		96.0163	1.78347	19.8081	-0.0070808
					7.48217	1.79084	18.3934	-0.00940025		18.5506	2.21181	-0.936646	-0.00560334		29.6363	1.79206	20.3521	-0.0254564		40.6941	2.21024	-0.874322	-0.0312207		51.7888	1.79351	19.6742	-0.0197527		62.8491	2.20901	-0.824632	-0.0129217		73.9038	1.78837	18.9978	-0.00622272		84.9928	2.20906	-0.77473	0.011121		96.048	1.78919	19.2451	-0.0100212
					7.51545	1.79683	18.5655	-0.0112706		18.5836	2.20587	-1.04916	-0.00513165		29.669	1.79794	19.6992	-0.0261193		40.7272	2.20427	-0.810648	-0.0309734		51.8208	1.79927	19.3768	-0.020853		62.8811	2.20324	-1.02247	-0.0118177		73.9374	1.79441	18.82	-0.00576986		85.0271	2.20288	-0.920249	0.0106696		96.0819	1.79529	18.9413	-0.011953
					7.54865	1.8028	18.4484	-0.0107546		18.6184	2.19962	-1.12923	-0.00552104		29.7027	1.80401	19.6814	-0.0266062		40.7627	2.19788	-0.877658	-0.0308912		51.8578	1.80593	19.074	-0.0197358		62.915	2.19714	-0.814765	-0.0106812		73.9742	1.80104	18.521	-0.00374235		85.0603	2.1969	-0.790985	0.00975371		96.1216	1.80243	18.6436	-0.00985614
					7.58201	1.80881	18.1615	-0.00981405		18.6499	2.19394	-1.0329	-0.00531998		29.7358	1.80998	19.5087	-0.0273117		40.7952	2.19204	-0.805395	-0.0337897		51.8914	1.81197	18.6624	-0.0207394		62.9481	2.19119	-0.867507	-0.00882555		74.0036	1.80632	18.201	-0.00321375		85.0937	2.19088	-0.916345	0.00965304		96.1503	1.80758	18.2042	-0.0116728
					7.61478	1.81471	18.1134	-0.00951694		18.6834	2.1879	-0.988607	-0.00246242		29.7701	1.81614	19.0017	-0.0252908		40.8288	2.18599	-1.09729	-0.0324779		51.9231	1.81769	18.6571	-0.0225219		62.9833	2.18485	-0.952192	-0.00810372		74.0374	1.81242	17.7159	-0.00378118		85.1282	2.18468	-0.79347	0.00958835		96.1833	1.81353	17.6088	-0.0115966
					7.64949	1.82095	17.7356	-0.0104958		18.7169	2.18188	-1.02211	-0.00299618		29.8054	1.8225	19.2304	-0.0258893		40.8618	2.18005	-1.20107	-0.0349886		51.9573	1.82384	18.2802	-0.0238246		63.0148	2.17919	-1.07436	-0.0108527		74.0699	1.81826	17.5991	-0.00462099		85.1604	2.17889	-0.960994	0.00585043		96.2183	1.81984	17.7964	-0.00903265
					7.68229	1.82686	17.7066	-0.0106077		18.7487	2.17616	-1.09565	-0.00462487		29.8383	1.82842	18.704	-0.0261988		40.8947	2.17413	-1.19553	-0.0338262		51.9963	1.83085	17.9945	-0.0225569		63.0489	2.17304	-0.908607	-0.00940171		74.1045	1.82448	17.8818	-0.00235719		85.1938	2.17286	-0.904703	0.00315816		96.2508	1.82569	17.3581	-0.00494671
					7.71252	1.8323	17.7507	-0.0119016		18.7835	2.16989	-1.21661	-0.00436711		29.8718	1.83445	18.6094	-0.0254236		40.9278	2.16818	-1.05079	-0.0334348		52.0246	1.83596	18.3339	-0.022518		63.0809	2.16729	-0.961633	-0.0088997		74.135	1.82998	17.7099	-0.00491014		85.2261	2.16706	-0.791411	0.00734274		96.2837	1.83161	17.4119	-0.00712367
					7.74951	1.83896	18.1377	-0.0123702		18.8169	2.16389	-1.02488	-0.00326805		29.9047	1.84038	18.5013	-0.0258541		40.9636	2.16173	-0.802982	-0.0302523		52.0583	1.84202	18.151	-0.0215076		63.1155	2.16106	-1.08692	-0.00967912		74.1685	1.83601	17.6452	-0.00515382		85.262	2.1606	-1.05434	0.00639191		96.3175	1.83768	17.2309	-0.00658927
					7.78149	1.84471	17.9183	-0.0134245		18.851	2.15773	-1.1978	-0.00343829		29.9374	1.84625	18.4376	-0.0251707		40.9896	2.15705	-1.26573	-0.030181		52.091	1.84791	17.7438	-0.0218125		63.1471	2.15536	-0.840959	-0.00856702		74.2041	1.84242	17.2241	-0.00488482		85.2945	2.15475	-1.07365	0.00547944		96.3505	1.84363	17.0066	-0.0050519
					7.8138	1.85053	17.8255	-0.0128616		18.892	2.15036	-1.01388	-0.00357484		29.9716	1.85241	18.1982	-0.0248602		41.0275	2.15022	-1.14989	-0.0292884		52.1243	1.85389	17.9023	-0.0225081		63.1811	2.14924	-0.880497	-0.00575692		74.2366	1.84826	17.0971	-0.00363556		85.3277	2.14877	-1.11638	0.00772275		96.3831	1.84949	17.0358	-0.00577697
					7.84858	1.85679	17.8811	-0.0129324		18.9167	2.14592	-1.13327	-0.00100417		30.0045	1.85834	18.0146	-0.0265545		41.0595	2.14447	-1.18041	-0.0297957		52.1574	1.85986	17.6777	-0.0217632		63.2144	2.14325	-0.96071	-0.00511697		74.2697	1.85422	17.1255	-0.00958232		85.3619	2.14261	-1.32543	0.0100095		96.419	1.85596	16.778	-0.007876
					7.88164	1.86274	17.5003	-0.0132545		18.9505	2.13984	-1.05491	-0.00164597		30.0392	1.86458	18.6212	-0.025293		41.089	2.13916	-1.13689	-0.0273985		52.1913	1.86596	17.4816	-0.0223094		63.2478	2.13724	-0.884473	-0.00711918		74.3043	1.86046	17.2713	-0.00727818		85.3957	2.13653	-1.20071	0.00809936		96.4501	1.86156	17.2301	-0.00865381
					7.91386	1.86854	17.7155	-0.0131516		18.9844	2.13372	-1.36554	-0.00314679		30.0715	1.87039	17.9635	-0.0247571		41.1399	2.13	-0.962769	-0.0287442		52.2171	1.87061	17.4567	-0.0213616		63.289	2.12983	-1.04937	-0.00615713		74.3395	1.8668	17.104	-0.00606207		85.4287	2.13059	-0.953825	0.00700062		96.4836	1.86759	17.127	-0.00946282
					7.94899	1.87486	17.8059	-0.0117736		19.0111	2.12892	-1.31052	-0.00370035		30.1052	1.87646	17.9317	-0.0255605		41.1608	2.12623	-1.30925	-0.0287892		52.2581	1.87799	17.7556	-0.020355		63.3179	2.12463	-1.14172	-0.00683235		74.3715	1.87254	17.163	-0.00620997		85.4617	2.12465	-0.961349	0.00949313		96.5172	1.87364	16.8333	-0.00828428
					7.98349	1.88107	17.8955	-0.0119485		19.0483	2.12223	-1.18516	-0.00215593		30.1373	1.88225	17.7943	-0.0262192		41.1944	2.12018	-1.04369	-0.0294638		52.2915	1.88399	17.5939	-0.0196208		63.3491	2.11901	-0.885395	-0.00646439		74.4044	1.87848	16.8674	-0.00729037		85.495	2.11866	-0.858421	0.00958165		96.5521	1.87991	16.7464	-0.00611395
					8.01427	1.88661	17.6433	-0.0121884		19.0847	2.11568	-1.29107	-0.00364255		30.171	1.8883	17.4582	-0.024314		41.2287	2.11401	-1.08032	-0.0287709		52.3246	1.88994	17.3447	-0.0237511		63.3842	2.11269	-1.30776	-0.00928135		74.4368	1.8843	17.1032	-0.00460164		85.5285	2.11262	-0.896824	0.00972006		96.5841	1.88568	16.5031	-0.00233982
					8.04971	1.89299	17.8147	-0.0108877		19.1243	2.10855	-1.24863	-0.003162		30.2049	1.8944	17.2826	-0.0254989		41.2616	2.10808	-1.43084	-0.0307828		52.3573	1.89585	17.2341	-0.0259364		63.4162	2.10693	-1.31677	-0.00725011		74.4732	1.89086	16.9394	-0.00452488		85.5624	2.10652	-1.05988	0.0110845		96.6172	1.89164	16.4169	0.00335614
					8.08446	1.89925	18.1648	-0.0112055		19.1528	2.10342	-1.20625	-0.00265822		30.2372	1.90022	17.3826	-0.0264134		41.2959	2.10191	-1.39826	-0.0296368		52.3898	1.90169	17.126	-0.0281079		63.4485	2.10111	-1.27908	-0.00896661		74.5032	1.89625	16.6513	-0.00572444		85.5956	2.10055	-1.18403	0.0144138		96.6504	1.89762	16.3608	0.00416198
					8.11655	1.90502	17.8216	-0.0103584		19.1858	2.09748	-1.23436	-0.00283397		30.2714	1.90637	17.4495	-0.0272255		41.3289	2.09596	-1.15826	-0.0294145		52.4247	1.90797	16.7313	-0.0291859		63.4831	2.09489	-1.21867	-0.0113802		74.538	1.90251	16.83	-0.00401341		85.629	2.09453	-1.09934	0.0117239		96.6838	1.90362	16.6394	0.00177156
					8.1506	1.91115	17.8842	-0.0100021		19.2189	2.09152	-1.18886	-0.00420814		30.3054	1.9125	17.7111	-0.0273113		41.3637	2.08971	-0.91386	-0.0293595		52.4566	1.91371	16.865	-0.0292367		63.5166	2.08885	-1.17452	-0.015175		74.5724	1.90872	16.9096	-0.00154317		85.6616	2.08868	-0.975262	0.009072		96.7193	1.91001	16.5698	0.0020831
					8.17738	1.91597	17.9232	-0.010727		19.2521	2.08554	-1.36582	-0.00426772		30.338	1.91836	17.4152	-0.0286268		41.3965	2.0838	-1.17054	-0.0301069		52.4919	1.92006	17.263	-0.0264257		63.5496	2.08291	-1.21817	-0.0126094		74.6043	1.91445	16.5599	0.00199305		85.695	2.08266	-0.796664	0.00859694		96.7477	1.91513	16.2128	0.00131558
					8.20563	1.92106	17.7673	-0.0109477		19.2858	2.07948	-1.32848	-0.0050969		30.3703	1.92417	17.308	-0.0298671		41.4285	2.07805	-1.02737	-0.0322937		52.5246	1.92595	16.8243	-0.0229146		63.5826	2.07698	-1.08351	-0.0172391		74.6374	1.9204	16.7136	0.000166582		85.7278	2.07674	-1.13384	0.00481061		96.7841	1.92167	16.2262	-0.000635708
					8.24855	1.92878	17.7861	-0.0113549		19.3185	2.07359	-1.48195	-0.00508731		30.4039	1.93023	17.1233	-0.031323		41.4621	2.072	-1.13398	-0.0318641		52.5586	1.93207	16.6311	-0.0220124		63.6172	2.07074	-1.42076	-0.0169709		74.6734	1.92688	16.8968	-0.000372302		85.7617	2.07065	-0.977605	0.000441393		96.8178	1.92774	16.4266	0.00202464
					8.2794	1.93434	17.5036	-0.0126893		19.3527	2.06743	-1.35276	-0.00490988		30.4376	1.93629	17.0575	-0.0313028		41.4929	2.06645	-1.40579	-0.0301915		52.5921	1.93811	16.6766	-0.0238944		63.6507	2.06473	-1.38286	-0.0134875		74.7052	1.93262	17.4262	-0.0014683		85.7964	2.06439	-1.38222	0.00304055		96.8504	1.93361	16.2402	0.000888644
					8.31561	1.94086	17.357	-0.0131556		19.387	2.06126	-1.53548	-0.00398658		30.4718	1.94244	17.1	-0.03111		41.5291	2.05994	-1.25097	-0.0306463		52.6255	1.94411	16.5774	-0.0238997		63.6842	2.05869	-1.36092	-0.0118985		74.7377	1.93846	17.2289	-0.00622528		85.8279	2.05874	-1.16593	0.0064355		96.8841	1.93968	16.1406	-0.000947357
					8.34988	1.94702	17.5691	-0.0101936		19.4256	2.05431	-1.73196	-0.00275956		30.5064	1.94867	16.8838	-0.0315693		41.5586	2.05463	-1.33388	-0.0287884		52.6594	1.95021	16.4312	-0.0254201		63.7124	2.0536	-1.20227	-0.0134501		74.771	1.94446	16.9487	-0.0103922		85.8621	2.05258	-1.28639	0.0103844		96.9181	1.94579	16.0267	-0.00560125
					8.38248	1.95289	17.4518	-0.0120625		19.4528	2.04943	-1.49374	-0.00258472		30.5403	1.95478	16.6871	-0.0310092		41.597	2.04772	-1.34978	-0.028279		52.6928	1.95623	16.354	-0.0274621		63.7493	2.04697	-1.1354	-0.0104973		74.8061	1.95078	16.7765	-0.00798369		85.8958	2.04652	-1.28405	0.0155144		96.9502	1.95157	15.7784	-0.00536737
					8.41682	1.95907	17.4318	-0.0119512		19.4854	2.04355	-1.52497	-0.00260641		30.5722	1.96052	16.6095	-0.0302561		41.6307	2.04164	-1.30044	-0.0306462		52.7254	1.9621	15.8605	-0.0260501		63.7824	2.04102	-1.38264	-0.0102175		74.8382	1.95655	16.6394	-0.00929539		85.9274	2.04081	-1.32735	0.0165673		96.9842	1.95769	15.7083	-0.00859433
					8.45366	1.9657	17.2518	-0.0114568		19.518	2.03768	-1.48756	-0.00123533		30.6069	1.96676	16.6174	-0.0303895		41.663	2.03584	-1.2646	-0.031958		52.7565	1.96769	16.1222	-0.0249104		63.8153	2.03509	-1.20547	-0.0130658		74.8715	1.96254	16.1998	-0.0106642		85.9605	2.03486	-1.22406	0.013565		97.0186	1.96389	16.0484	-0.00911305
					8.483	1.97099	17.3736	-0.0113495		19.5519	2.03158	-1.52653	-0.00271995		30.6407	1.97286	16.7202	-0.0304846		41.6951	2.03006	-1.41012	-0.0320657		52.7918	1.97405	15.8636	-0.0242592		63.8502	2.02881	-1.63258	-0.0139406		74.9055	1.96867	16.6332	-0.0076241		85.9944	2.02876	-1.16642	0.0141526		97.052	1.96989	15.4632	-0.00827568
					8.51505	1.97675	17.4018	-0.0138047		19.5852	2.02559	-1.62016	-0.00403387		30.6771	1.97941	16.4266	-0.0285803		41.7291	2.02393	-1.41721	-0.0324398		52.8266	1.98031	16.0855	-0.0242376		63.883	2.02291	-1.47571	-0.0145663		74.9406	1.97499	16.1027	-0.00810898		86.0284	2.02265	-1.20738	0.0101923		97.0857	1.97596	15.4491	-0.00622073
					8.55266	1.98352	17.1133	-0.0135982		19.6183	2.01963	-1.63727	-0.00180405		30.7059	1.98459	16.3661	-0.0275709		41.7627	2.01789	-1.29718	-0.0314693		52.8561	1.98563	15.6695	-0.0246424		63.9165	2.01688	-1.51851	-0.0156838		74.971	1.98045	15.6364	-0.00979938		86.0629	2.01643	-1.39386	0.00645959		97.1183	1.98184	15.0824	-0.00722325
					8.5841	1.98918	17.3452	-0.0131847		19.6528	2.01342	-1.78662	-0.00206529		30.737	1.99019	16.075	-0.0269334		41.7964	2.01182	-1.56969	-0.0287926		52.8921	1.9921	15.4859	-0.0275094		63.9494	2.01096	-1.33949	-0.0164248		75.0063	1.98682	15.8457	-0.00758573		86.096	2.01047	-1.21881	0.00904381		97.1515	1.9878	14.9878	-0.00495565
					8.61729	1.99516	17.0668	-0.0136281		19.6855	2.00753	-1.95734	-0.00451345		30.7733	1.99672	15.9717	-0.0273112		41.8287	2.00601	-1.60461	-0.0295313		52.9238	1.99781	15.2065	-0.0299823		63.9828	2.00494	-1.23166	-0.0125852		75.0386	1.99263	15.4636	-0.00780788		86.1277	2.00477	-1.51993	0.0108659		97.1851	1.99385	14.7163	-0.0074872
					8.65178	2.00136	16.945	-0.0149015		19.717	2.00185	-1.70655	-0.00468382		30.8064	2.00268	15.9368	-0.0287495		41.8631	1.99982	-1.51056	-0.027945		52.9551	2.00344	14.8595	-0.0299358		64.0164	1.99889	-1.3759	-0.0116616		75.0726	1.99875	15.1882	-0.00557105		86.1575	1.99941	-1.27915	0.00851607		97.2181	1.9998	14.3003	-0.010169
					8.68486	2.00732	17.07	-0.0152353		19.7529	1.99541	-1.72316	-0.0047454		30.8398	2.00869	15.8605	-0.0313812		41.8961	1.99387	-1.53079	-0.0297418		52.9916	2.01002	14.4586	-0.029272		64.0493	1.99297	-1.39088	-0.00897539		75.1063	2.00482	14.7064	-0.00263913		86.1989	1.99196	-1.50247	0.0093884		97.2503	2.00559	13.8855	-0.0113198
					8.71955	2.01356	16.7828	-0.0148023		19.7856	1.98952	-1.51581	-0.00643833		30.8736	2.01477	15.7139	-0.031987		41.9307	1.98765	-1.54052	-0.0310404		53.025	2.01602	14.3559	-0.0301349		64.0839	1.98673	-1.46939	-0.00338071		75.1396	2.01081	14.334	-0.00459172		86.2303	1.9863	-1.79081	0.0115172		97.285	2.01184	13.9084	-0.0102176
					8.75483	2.01991	16.6553	-0.0149257		19.8166	1.98393	-1.5956	-0.0048265		30.9072	2.02081	15.4499	-0.032068		41.9635	1.98174	-1.4422	-0.0319745		53.0583	2.02202	14.0691	-0.028659		64.1173	1.98072	-1.36298	0.00146281		75.1704	2.01636	13.9932	-0.00691481		86.2631	1.9804	-1.59418	0.00857834		97.3189	2.01795	13.7095	-0.00852294
					8.78447	2.02525	16.76	-0.0128894		19.8538	1.97723	-1.54612	-0.00332804		30.9432	2.0273	15.4311	-0.0307103		41.9981	1.97552	-1.5134	-0.0307148		53.0918	2.02806	14.1083	-0.0253058		64.1526	1.97438	-1.28213	0.000403523		75.2036	2.02232	13.7833	-0.0047793		86.2941	1.97481	-1.48706	0.00794679		97.3518	2.02385	13.3594	-0.00386144
					8.81821	2.03132	16.5858	-0.0117797		19.8869	1.97127	-1.83191	-0.00193261		30.9693	2.03199	15.0247	-0.0278578		42.0311	1.96958	-1.77519	-0.0317272		53.1261	2.03422	13.6941	-0.0270687		64.1836	1.96879	-1.59759	0.000102565		75.2316	2.02737	13.253	-0.004011		86.3293	1.96848	-1.3534	0.00809411		97.3869	2.03019	13.045	-0.00116568
					8.85081	2.03719	16.394	-0.0105959		19.9204	1.96526	-1.93448	-0.000699325		31.007	2.03878	14.7268	-0.0249433		42.0645	1.96357	-1.588	-0.030745		53.1595	2.04024	13.1693	-0.0275743		64.2179	1.96263	-1.57473	-0.00240686		75.2729	2.03481	13.4052	-0.00432786		86.3633	1.96236	-1.75659	0.00809327		97.4179	2.03576	12.8571	-0.000441433
					8.88442	2.04324	16.0216	-0.0101323		19.953	1.95938	-1.76802	0.000473428		31.0389	2.04453	14.4367	-0.0244975		42.0967	1.95776	-1.66609	-0.0300405		53.1922	2.04613	13.2897	-0.0277799		64.2503	1.95678	-1.57544	-0.00554934		75.3048	2.04054	12.8686	-0.000661634		86.3997	1.95581	-1.45391	0.00594407		97.4534	2.04215	12.7795	-0.00318372
					8.91947	2.04955	16.215	-0.0122606		19.9868	1.95329	-2.03273	-2.935e-05		31.0709	2.05029	14.4513	-0.0229579		42.131	1.95159	-1.38705	-0.0289785		53.2285	2.05265	13.4268	-0.0280615		64.282	1.95109	-1.73132	-0.00801612		75.3393	2.04675	13.0652	0.00139171		86.4301	1.95034	-1.56777	0.00674048		97.4868	2.04816	12.6841	-0.00660267
					8.95122	2.05526	15.8678	-0.0160393		20.0188	1.94754	-2.06304	-0.000802046		31.1039	2.05623	14.298	-0.0239653		42.1644	1.94558	-1.79635	-0.031467		53.2604	2.0584	13.0915	-0.0279985		64.3155	1.94505	-1.38804	-0.00869854		75.3734	2.05289	12.9354	-2.9568e-05		86.4629	1.94444	-1.71564	0.00983933		97.5194	2.05404	12.4295	-0.00502886
					8.98548	2.06143	15.691	-0.0162651		20.0542	1.94116	-2.05842	-0.00142616		31.1407	2.06285	13.9495	-0.0238177		42.2002	1.93913	-1.66751	-0.0295085		53.2928	2.06422	12.9438	-0.0261344		64.351	1.93866	-1.40848	-0.00804594		75.4066	2.05887	12.4471	-0.00297452		86.4978	1.93815	-1.48515	0.00950824		97.5516	2.05982	12.0573	-0.00425508
					9.01652	2.06702	15.4231	-0.0154003		20.0848	1.93566	-2.10705	-0.00149793		31.1745	2.06893	13.8861	-0.0235731		42.2338	1.9331	-1.60909	-0.030202		53.3265	2.07029	12.738	-0.0283368		64.3842	1.93269	-1.59901	-0.00569687		75.4398	2.06484	12.3754	-0.00524204		86.5302	1.93232	-1.46726	0.00864343		97.5866	2.06613	11.898	0.000427687
					9.05454	2.07386	15.3862	-0.0164169		20.1179	1.9297	-1.80508	-0.00248875		31.2087	2.07508	14.0109	-0.0232563		42.2647	1.92753	-1.5342	-0.0301135		53.3603	2.07638	12.4453	-0.026874		64.4152	1.92712	-1.55968	-0.00602362		75.4731	2.07084	12.1927	-0.00513365		86.563	1.92641	-1.72472	0.0100889		97.6204	2.0722	11.9877	0.00231812
					9.08482	2.07931	15.0759	-0.0142747		20.1545	1.92311	-1.76724	-0.0029786		31.2423	2.08114	13.653	-0.0232891		42.2982	1.92149	-1.52142	-0.0331868		53.3939	2.08242	12.1643	-0.0286152		64.4517	1.92054	-1.90971	-0.00685202		75.5125	2.07793	12.1496	-0.00481604		86.596	1.92047	-1.44234	0.0113909		97.6536	2.07819	11.5086	0.00430046
					9.11796	2.08528	14.9758	-0.0131872		20.1869	1.91727	-1.89743	-0.00272962		31.2744	2.08692	13.5434	-0.0207332		42.3304	1.9157	-1.56252	-0.0319858		53.428	2.08857	12.155	-0.0296722		64.4847	1.9146	-1.84696	-0.00673769		75.5398	2.08285	11.6735	-0.00491655		86.6296	1.91443	-1.54967	0.0099103		97.6877	2.08432	11.32	0.00585611
					9.15187	2.09138	14.9581	-0.0128779		20.2211	1.91113	-2.26591	-0.00241735		31.3082	2.09301	13.2168	-0.0218139		42.3644	1.90959	-1.80408	-0.0340162		53.4614	2.09457	11.9686	-0.0317691		64.5179	1.90863	-1.60696	-0.00527471		75.5733	2.08887	11.9731	-0.00632337		86.6631	1.90839	-1.52149	0.00973433		97.7201	2.09016	11.3623	0.00652322
					9.18516	2.09737	14.3434	-0.0147441		20.2513	1.90569	-2.24185	-0.00158107		31.3421	2.0991	13.2138	-0.0219935		42.396	1.90389	-1.64096	-0.0328254		53.4931	2.10029	11.7751	-0.0300786		64.5497	1.90289	-1.64557	-0.00551532		75.6086	2.09523	11.4061	-0.00509664		86.702	1.90139	-1.64075	0.0109918		97.7517	2.09585	10.9835	0.00328893
					9.21855	2.10338	14.3395	-0.0133606		20.2896	1.89879	-1.97303	-0.00158033		31.3746	2.10495	13.023	-0.0211528		42.4325	1.89732	-2.07233	-0.0322019		53.5274	2.10646	11.4937	-0.0301344		64.5861	1.89634	-1.60902	-0.0048539		75.64	2.10088	11.136	-0.00601295		86.7323	1.89594	-1.58353	0.0109099		97.7861	2.10204	10.908	-0.00108453
					9.25146	2.10931	14.0104	-0.0132146		20.3192	1.89347	-2.02563	-0.000775243		31.4074	2.11086	12.687	-0.0232414		42.466	1.8913	-1.95145	-0.0306857		53.5592	2.11217	11.4055	-0.0288929		64.6179	1.89062	-1.79933	-0.0032236		75.6726	2.10675	10.9965	-0.007155		86.7649	1.89007	-2.10996	0.00880439		97.8201	2.10816	10.7697	-0.00211436
					9.28518	2.11538	14.1368	-0.0119156		20.3536	1.88727	-1.99532	0.000163392		31.4405	2.11682	12.4048	-0.0246824		42.4732	1.89	-1.99794	-0.0286742		53.5936	2.11837	11.0472	-0.0308809		64.653	1.8843	-1.60298	-0.00646992		75.7103	2.11353	10.7832	-0.00706519		86.798	1.88411	-1.93647	0.0086196		97.8532	2.11412	10.4732	-0.00866689
					9.31794	2.12127	13.8321	-0.0119829		20.3862	1.88141	-1.90602	0.00118182		31.474	2.12284	12.3625	-0.024939		42.5304	1.8797	-1.8723	-0.0261486		53.6273	2.12444	11.0214	-0.0294687		64.6859	1.87838	-2.14332	-0.00842957		75.7411	2.11908	10.5452	-0.00798334		86.8318	1.87803	-1.91106	0.0108466		97.887	2.1202	10.3935	-0.0101959
					9.35306	2.1276	13.4261	-0.0125559		20.4235	1.8747	-2.21828	0.0016641		31.5082	2.129	11.9038	-0.0263332		42.5644	1.87358	-1.77278	-0.026478		53.6607	2.13046	10.8435	-0.0311606		64.7171	1.87276	-1.8263	-0.00757621		75.7736	2.12492	10.2626	-0.00942323		86.8634	1.87234	-1.62328	0.0129915		97.9201	2.12615	9.89552	-0.0134007
					9.38626	2.13357	13.186	-0.0143714		20.4539	1.86922	-1.8833	0.00233427		31.5411	2.13492	11.9473	-0.0270135		42.5973	1.86766	-1.8148	-0.0266027		53.6942	2.13648	10.5749	-0.0309997		64.7525	1.86639	-1.69533	-0.00775463		75.8076	2.13105	10.2774	-0.01017		86.8976	1.86618	-1.59887	0.0143344		97.9529	2.13206	9.86194	-0.011894
					9.41965	2.13958	12.9708	-0.0134285		20.4826	1.86405	-2.3014	0.00112133		31.5741	2.14087	11.6021	-0.0254437		42.6304	1.8617	-1.84518	-0.0258973		53.7198	2.14109	10.3482	-0.0312654		64.7894	1.85974	-2.15035	-0.009023		75.8415	2.13714	10.0676	-0.00985755		86.9313	1.86012	-1.55911	0.0160364		97.9868	2.13817	9.77058	-0.0138122
					9.45125	2.14527	12.8518	-0.0136788		20.5237	1.85665	-2.09832	0.00160272		31.6074	2.14686	11.6508	-0.0250224		42.6657	1.85534	-1.86726	-0.0278903		53.7608	2.14846	10.0269	-0.0275292		64.8198	1.85428	-1.74446	-0.00494919		75.8751	2.1432	9.74865	-0.00992917		86.9638	1.85427	-1.76753	0.0147226		98.0204	2.14422	9.47465	-0.0135994
					9.48501	2.15135	12.9981	-0.0149454		20.5549	1.85104	-2.51869	0.00109356		31.6414	2.15298	11.2842	-0.0257838		42.6983	1.84948	-1.84859	-0.0291816		53.7967	2.15493	10.0213	-0.0274834		64.8519	1.8485	-1.9151	-0.002362		75.9079	2.14909	9.27092	-0.00707837		86.9966	1.84837	-1.51056	0.0150837		98.0526	2.15	9.08125	-0.013691
					9.51866	2.1574	12.6812	-0.0127878		20.5871	1.84524	-2.19521	-0.00134372		31.6739	2.15883	11.0252	-0.0257366		42.7287	1.844	-1.74871	-0.0292261		53.8267	2.16033	9.635	-0.0289211		64.8875	1.84209	-1.86137	-0.00494963		75.9409	2.15504	9.08487	-0.0052527		87.0318	1.84203	-2.00596	0.013759		98.0863	2.15608	8.72831	-0.011585
					9.55312	2.16361	12.5176	-0.0123764		20.6186	1.83958	-2.47006	-0.00232656		31.7084	2.16503	11.1252	-0.0278693		42.7665	1.8372	-2.38332	-0.0284142		53.8603	2.16639	9.41835	-0.0299242		64.9191	1.8364	-1.91461	-0.00489754		75.9746	2.1611	8.65647	-0.00440121		87.0646	1.83612	-1.85576	0.0123948		98.1208	2.16229	8.38098	-0.00967357
					9.58675	2.16966	12.4718	-0.0143712		20.6535	1.83329	-2.35407	-0.0019123		31.7408	2.17087	11.0025	-0.0283482		42.7988	1.83138	-2.11855	-0.0298546		53.8952	2.17266	9.23926	-0.031296		64.9528	1.83034	-1.72231	-0.00545594		76.0076	2.16705	8.31227	-0.00621611		87.0972	1.83025	-1.85782	0.0159073		98.1536	2.16819	8.29764	-0.00806192
					9.6195	2.17556	12.2157	-0.0158772		20.6932	1.82615	-2.25945	-0.00372883		31.774	2.17686	10.9181	-0.0287056		42.8327	1.82529	-2.10421	-0.0281636		53.9281	2.17858	8.68693	-0.0333887		64.9857	1.82441	-1.76873	-0.00577872		76.0411	2.17308	7.9687	-0.00527236		87.1244	1.82536	-1.84689	0.0171403		98.1869	2.17418	7.91049	-0.00748763
					9.65283	2.18156	11.8976	-0.0146267		20.7211	1.82113	-2.12515	-0.00432511		31.8065	2.18269	10.696	-0.0288437		42.8653	1.81941	-2.35216	-0.0287526		53.9613	2.18455	8.41463	-0.0374559		65.02	1.81825	-2.40405	-0.00671961		76.0758	2.17932	7.94669	-0.00674328		87.1647	1.81811	-1.82417	0.0187436		98.2222	2.18053	7.48913	-0.00696488
					9.68572	2.18748	11.8009	-0.0159364		20.7558	1.81488	-1.98957	-0.0028481		31.8423	2.18914	10.6468	-0.0288655		42.901	1.813	-1.94662	-0.0284404		53.9962	2.19084	8.4389	-0.0326403		65.0531	1.81229	-1.93945	-0.00859546		76.1084	2.18519	7.07763	-0.00598505		87.1997	1.8118	-1.89175	0.0195083		98.2547	2.18638	7.11404	-0.0070302
					9.71966	2.19358	11.7886	-0.0155658		20.7887	1.80896	-2.2449	-0.00338697		31.8763	2.19526	10.3473	-0.0280629		42.9321	1.8074	-2.01917	-0.0280036		54.0283	2.19661	7.81239	-0.0339153		65.0863	1.80631	-2.12004	-0.00775799		76.1415	2.19116	6.60614	-0.00555746		87.2305	1.80626	-1.714	0.0196579		98.2837	2.1916	6.52792	-0.00706345
					9.75381	2.19973	11.6146	-0.0155491		20.8225	1.80288	-2.34158	-0.00163613		31.9086	2.20108	10.244	-0.0271352		42.9647	1.80153	-2.0022	-0.026796		54.0616	2.20261	7.00522	-0.0316624		65.1196	1.80031	-1.95166	-0.00866859		76.1756	2.19729	6.11741	-0.00188732		87.2648	1.80009	-2.09029	0.0179613		98.3228	2.19865	5.90879	-0.00907288
					9.78654	2.20562	11.4964	-0.0152829		20.8562	1.79681	-2.42194	-0.00121089		31.9417	2.20704	10.1248	-0.0310178		43.0002	1.79513	-2.51578	-0.0262927		54.0956	2.20872	6.37331	-0.0319366		65.1543	1.79406	-2.10946	-0.0106906		76.2084	2.20319	5.32117	-0.00267584		87.2952	1.79462	-2.2246	0.0190355		98.3542	2.20429	5.16614	-0.0061487
					9.81917	2.2115	11.4487	-0.0159096		20.8887	1.79095	-2.44515	-0.00209045		31.9759	2.21319	9.85186	-0.0285169		43.0316	1.78949	-2.18641	-0.0248091		54.1265	2.21429	5.67354	-0.0286148		65.1859	1.78838	-2.08596	-0.012377		76.2423	2.20929	4.45388	-0.00275934		87.33	1.78836	-1.98389	0.0164765		98.3873	2.21025	4.65377	-0.008781
					9.85304	2.21759	11.1864	-0.01487		20.922	1.78497	-2.33193	-0.00217402		32.011	2.2195	9.66588	-0.0293447		43.0652	1.78343	-2.5123	-0.0257852		54.1628	2.22082	4.67315	-0.0294176		65.2196	1.78232	-2.02662	-0.010378		76.2713	2.21452	3.60958	-0.00359695		87.3656	1.78196	-1.93235	0.0161187		98.4224	2.21657	3.49267	-0.00929129
					9.88469	2.22329	11.1798	-0.0142394		20.9533	1.77933	-2.49917	-0.00034778		32.0436	2.22538	9.57537	-0.028411		43.1001	1.77716	-2.29445	-0.0266635		54.1944	2.22651	3.92667	-0.0300084		65.2527	1.77636	-2.02421	-0.0110037		76.3042	2.22043	2.77785	-0.00576483		87.3901	1.77754	-2.2219	0.0169272		98.4541	2.22228	3.04596	-0.0102193
					9.9199	2.22963	10.98	-0.0126974		20.9876	1.77315	-2.33519	-0.000140507		32.0764	2.23127	9.22166	-0.0310868		43.1326	1.7713	-2.45331	-0.02535		54.2277	2.23252	2.88021	-0.0292393		65.2861	1.77035	-2.60543	-0.0108936		76.3423	2.22729	2.32284	-0.00752961		87.4325	1.7699	-2.16603	0.0161334		98.4897	2.22868	2.45061	-0.00800617
					9.94917	2.2349	10.831	-0.0123278		21.0246	1.76649	-2.35727	8.1369e-05		32.1096	2.23726	8.70616	-0.0262267		43.1643	1.7656	-2.09363	-0.025769		54.2625	2.23878	2.49675	-0.0287862		65.3193	1.76438	-2.43258	-0.00667837		76.375	2.23319	2.34307	-0.00699206		87.4662	1.76384	-2.42328	0.0178574		98.5214	2.23439	1.95407	-0.00725595
					9.98377	2.24112	10.6336	-0.010263		21.0546	1.76109	-2.99578	0.00248491		32.1427	2.2432	8.34897	-0.0263674		43.1992	1.75932	-2.49349	-0.0243289		54.2956	2.24472	2.34761	-0.0287495		65.3545	1.75803	-2.60202	-0.00715109		76.4092	2.23934	2.07539	-0.0058991		87.5009	1.75759	-2.41363	0.0199708		98.5544	2.24033	2.03904	-0.00469402
					10.0205	2.24773	10.5071	-0.0114203		21.0891	1.75489	-2.79148	0.00112843		32.1753	2.24908	8.1287	-0.0247566		43.251	1.75	-2.29558	-0.0243042		54.3287	2.25069	2.23375	-0.0289905		65.3859	1.75237	-2.28941	-0.00732207		76.4428	2.24539	1.92632	-0.00406345		87.5328	1.75185	-2.21537	0.0218325		98.5875	2.24629	1.89977	-0.00534286
					10.0536	2.25369	10.3145	-0.0110244		21.1223	1.74891	-2.78105	-0.000516714		32.2103	2.25538	8.07007	-0.0263869		43.2669	1.74713	-2.98087	-0.023889		54.3613	2.25656	2.13679	-0.0280803		65.4215	1.74597	-2.69147	-0.00514287		76.4777	2.25166	1.99936	-0.00307369		87.5658	1.74591	-2.10009	0.0204619		98.6207	2.25227	1.68121	-0.00724001
					10.0895	2.26015	10.3414	-0.011958		21.1555	1.74293	-3.10403	-0.000758991		32.2423	2.26115	7.68781	-0.025445		43.2989	1.74137	-2.64185	-0.0236653		54.3966	2.26292	2.13239	-0.0299125		65.4586	1.7393	-2.52217	-0.00384178		76.5102	2.25752	2.05061	-0.00193379		87.6004	1.73968	-2.9463	0.0223747		98.6541	2.25828	1.96735	-0.0107608
					10.1215	2.26591	10.1927	-0.0111109		21.1867	1.73732	-3.10261	-0.000563924		32.2757	2.26716	7.27063	-0.0287015		43.3319	1.73542	-2.71851	-0.0235051		54.4265	2.26829	2.04387	-0.0300514		65.4879	1.73403	-2.46034	-0.00543076		76.5424	2.26331	1.95173	-0.000980482		87.6325	1.73391	-2.84281	0.0217907		98.6831	2.26349	1.94477	-0.0136273
					10.1547	2.27188	9.98716	-0.013247		21.2225	1.73087	-2.81903	-0.00358976		32.3087	2.2731	6.78112	-0.0304292		43.3634	1.72976	-2.81768	-0.0261595		54.4618	2.27464	1.74971	-0.0311638		65.5208	1.7281	-2.71879	-0.00643824		76.5757	2.2693	1.95478	-0.00337444		87.666	1.72787	-2.82257	0.0206484		98.7218	2.27047	1.62243	-0.0150674
					10.1869	2.2777	9.78421	-0.0123066		21.2542	1.72516	-3.0997	-0.0040385		32.3422	2.27913	6.45906	-0.0309058		43.4003	1.72312	-2.76153	-0.0259196		54.495	2.28063	1.82517	-0.0346055		65.5544	1.72206	-2.58804	-0.00718123		76.6101	2.27549	1.70847	-0.00443134		87.6984	1.72204	-2.66073	0.0197109		98.7555	2.27652	1.75134	-0.0112614
					10.2218	2.28398	9.57772	-0.0127701		21.29	1.71872	-2.96575	-0.00198367		32.3754	2.2851	5.97778	-0.0299605		43.434	1.71706	-2.78985	-0.02562		54.5279	2.28655	2.03485	-0.0333452		65.587	1.71618	-2.76493	-0.0101359		76.6429	2.2814	1.89878	-0.00394413		87.7318	1.71604	-2.6192	0.0200361		98.7872	2.28224	1.82822	-0.00734578
					10.2547	2.28989	9.49658	-0.011115		21.3192	1.71347	-3.14343	-0.00332755		32.41	2.29132	5.43525	-0.030418		43.4679	1.71095	-3.01551	-0.0259543		54.5621	2.29271	2.09704	-0.0321722		65.6221	1.70986	-3.18261	-0.0112311		76.6768	2.28751	1.8422	-0.00266236		87.7651	1.71003	-2.76103	0.0188171		98.8213	2.28837	1.70477	-0.00473779
					10.2873	2.29576	9.35305	-0.0117906		21.3565	1.70676	-3.371	-0.00112024		32.4421	2.29711	4.59826	-0.0293194		43.4999	1.7052	-2.96029	-0.0265152		54.5974	2.29906	2.05551	-0.0327474		65.654	1.70412	-3.14314	-0.0136941		76.7086	2.29322	1.78797	-0.004955		87.8	1.70376	-2.686	0.0188766		98.8547	2.29438	1.51695	-0.0026691
					10.3211	2.30184	9.13874	-0.0117481		21.3909	1.70056	-3.5758	0.00056464		32.474	2.30284	3.84951	-0.0290269		43.5338	1.69908	-3.04163	-0.0254886		54.6308	2.30506	1.89338	-0.0319076		65.6874	1.69812	-3.01374	-0.0116657		76.7431	2.29943	1.57537	-0.0019913		87.8321	1.69798	-3.03454	0.0195223		98.8894	2.30062	1.54875	-0.00339842
					10.3547	2.30789	9.19979	-0.0142663		21.4237	1.69465	-3.6054	0.00317678		32.5104	2.3094	3.06414	-0.0301728		43.5672	1.69307	-3.16366	-0.0234279		54.6632	2.31089	2.00525	-0.0291787		65.7242	1.69148	-3.0422	-0.00984049		76.777	2.30554	1.56572	-0.00273317		87.8671	1.69167	-3.40557	0.016963		98.9226	2.3066	1.65395	-0.00418208
					10.3875	2.3138	8.71589	-0.0131028		21.4569	1.68867	-3.78343	0.00175525		32.536	2.31401	2.52295	-0.029727		43.5993	1.6873	-3.66595	-0.0250234		54.6973	2.31704	1.98055	-0.027475		65.7516	1.68656	-3.10779	-0.00997683		76.8096	2.3114	1.74055	-0.00334888		87.8999	1.68578	-3.31592	0.0184628		98.9583	2.31302	1.37335	-0.00460489
					10.4247	2.32049	8.72625	-0.0133153		21.49	1.68272	-3.59688	0.00146661		32.579	2.32174	2.06531	-0.027506		43.6348	1.68092	-3.57686	-0.0257117		54.7294	2.32281	1.61377	-0.0260331		65.7878	1.68005	-3.17281	-0.00938907		76.8431	2.31743	1.55457	-0.00549105		87.9321	1.67998	-3.51851	0.0209946		98.9894	2.31864	1.77995	-0.00578257
					10.4547	2.32589	8.36118	-0.0133666		21.5236	1.67667	-3.70698	-0.0001891		32.6092	2.32717	1.95663	-0.0278099		43.6691	1.67474	-3.53512	-0.0246584		54.7637	2.32899	1.8652	-0.0247526		65.823	1.67371	-3.33714	-0.00557756		76.8763	2.32342	1.6252	-0.00378108		87.9662	1.67384	-3.33516	0.0207616		99.0241	2.32488	1.61001	-0.00660202
					10.4894	2.33214	8.24653	-0.0142384		21.556	1.67085	-3.91787	0.00118384		32.6445	2.33354	2.10328	-0.0270279		43.7006	1.66906	-3.78499	-0.025925		54.7981	2.33517	1.35333	-0.0231092		65.8541	1.66811	-3.89466	-0.00467869		76.9104	2.32956	1.79194	-0.00559125		88.005	1.66686	-3.56025	0.0206292		99.0566	2.33073	1.47329	-0.00392722
					10.5198	2.33762	8.44543	-0.0146567		21.5916	1.66443	-4.05814	-0.000251621		32.6798	2.33989	1.82197	-0.0249548		43.7345	1.66296	-3.97352	-0.0295584		54.8303	2.34099	1.9425	-0.0219135		65.8883	1.66196	-3.99709	-0.00595267		76.9425	2.33533	1.69867	-0.00404673		88.0325	1.66191	-3.57885	0.0220745		99.0899	2.33671	1.44951	-0.00327517
					10.5532	2.34363	8.13672	-0.0178478		21.6234	1.65871	-4.76955	0.00125813		32.7092	2.34518	1.75184	-0.025238		43.7679	1.65696	-3.74332	-0.0282601		54.866	2.3474	1.63613	-0.0225901		65.9211	1.65605	-4.04976	-0.0029425		76.9773	2.34159	1.70378	-0.00475677		88.0654	1.65599	-3.71038	0.0216956		99.1239	2.34285	1.56344	-0.000208747
					10.5897	2.35018	8.04458	-0.0220394		21.657	1.65266	-4.60195	0.00275768		32.7442	2.35148	1.83872	-0.0279969		43.8008	1.65102	-4.02329	-0.0289136		54.8966	2.35291	1.58602	-0.0235864		65.955	1.64995	-4.1578	-0.00253483		77.0097	2.34743	1.49452	-0.00486417		88.0994	1.64987	-4.17782	0.0224509		99.153	2.34807	1.59908	0.000811487
					10.6219	2.35599	7.56685	-0.0254633		21.6909	1.64655	-4.80178	0.00389174		32.7771	2.3574	1.82673	-0.0263891		43.8347	1.64492	-4.69338	-0.0296274		54.9306	2.35904	1.84149	-0.0243088		65.9878	1.64403	-4.50378	-0.0015693		77.0422	2.35327	1.63471	-0.000660036		88.1341	1.64362	-4.34499	0.0229779		99.1896	2.35467	1.65807	0.00273969
					10.6558	2.36208	7.45598	-0.0264989		21.7248	1.64045	-5.24543	0.0042815		32.8032	2.36209	1.58779	-0.0268091		43.8671	1.63909	-5.09331	-0.0293961		54.9664	2.36548	1.64493	-0.0253435		66.0213	1.63802	-4.84756	0.00162792		77.0742	2.35904	1.61484	-0.000653649		88.168	1.63751	-4.50733	0.0250137		99.2225	2.36058	1.56579	0.00314581
					10.6883	2.36795	7.08863	-0.0261509		21.7571	1.63464	-5.29548	0.0053012		32.8442	2.36948	1.69129	-0.0285797		43.9015	1.6329	-5.29825	-0.028827		54.9957	2.37075	1.75652	-0.0234989		66.0542	1.63209	-4.71489	0.00469664		77.1123	2.3659	1.60653	0.00189737		88.201	1.63158	-5.18268	0.0264917		99.2565	2.3667	2.26016	0.000424405
					10.7202	2.37368	6.25903	-0.0269546		21.7893	1.62885	-5.65452	0.00687832		32.8766	2.37531	1.79436	-0.0277831		43.9353	1.62682	-5.31422	-0.0290908		55.0304	2.37699	1.57473	-0.0240834		66.0873	1.62613	-5.16302	0.00503796		77.1447	2.37173	1.41579	0.00476217		88.2359	1.62529	-5.4082	0.0289229		99.2879	2.37236	1.47727	-0.00298715
					10.7547	2.37989	5.95067	-0.0268788		21.8235	1.62269	-6.04032	0.00782531		32.9107	2.38145	1.78634	-0.0288592		43.9679	1.62095	-5.63017	-0.0278992		55.0624	2.38276	1.54016	-0.0259124		66.1217	1.61994	-5.62726	0.00840237		77.1779	2.37769	1.31564	0.00326512		88.2685	1.61943	-5.78549	0.0269644		99.3232	2.37871	1.74438	-0.00256527
					10.7854	2.38542	5.16458	-0.0261917		21.8569	1.61668	-6.07745	0.00929507		32.9461	2.38782	1.79017	-0.0292704		44.0001	1.61516	-5.93981	-0.0288609		55.097	2.38899	1.73296	-0.0242268		66.1555	1.61385	-5.86123	0.00769258		77.2114	2.38373	1.50524	-0.00153484		88.3	1.61375	-5.92128	0.0286259		99.3549	2.38441	1.11432	-0.00501672
					10.8251	2.39257	4.76728	-0.0251114		21.8901	1.6107	-6.84983	0.00949617		32.9773	2.39345	1.5041	-0.0301789		44.0343	1.60901	-6.48604	-0.0266837		55.1279	2.39455	1.737	-0.0258666		66.1896	1.60772	-6.73896	0.00327415		77.2457	2.3899	1.64784	0.00010302		88.3349	1.60747	-6.50833	0.0272054		99.3903	2.3908	1.25544	-0.00614719
					10.8615	2.39911	4.49924	-0.0246693		21.9169	1.60588	-7.57225	0.0102522		33.0108	2.39948	1.35595	-0.0312093		44.0686	1.60282	-7.0405	-0.0227692		55.1636	2.40097	1.59929	-0.0295196		66.2212	1.60203	-7.12164	0.00389442		77.2779	2.39571	1.5381	-0.00410045		88.3676	1.6016	-7.07031	0.0292775		99.4218	2.39646	1.11439	-0.00483754
					10.8893	2.40412	3.81466	-0.0238323		21.958	1.59849	-7.73161	0.00934921		33.0455	2.40571	1.54605	-0.0322281		44.1034	1.59656	-7.36533	-0.0230402		55.1961	2.40682	1.62953	-0.0304501		66.256	1.59576	-7.69598	0.0058945		77.3115	2.40175	1.48295	-0.00389072		88.4014	1.59549	-7.18311	0.0282207		99.4557	2.40257	1.44199	-0.00586098
					10.9232	2.41022	3.71301	-0.023458		21.989	1.5929	-8.67557	0.00947138		33.0745	2.41094	1.40309	-0.0303794		44.1354	1.59081	-8.41363	-0.0207787		55.2299	2.4129	1.28334	-0.028023		66.2896	1.58972	-8.12849	0.00580502		77.3437	2.40754	1.23414	0.000666681		88.4337	1.58968	-8.28835	0.0284209		99.489	2.40856	1.05122	-0.00516745
					10.9559	2.41611	3.33267	-0.021365		22.0256	1.58631	-9.4963	0.00910963		33.1103	2.41738	1.85441	-0.0313578		44.1698	1.58462	-9.26801	-0.020208		55.265	2.41922	1.71528	-0.0297821		66.3229	1.58372	-9.01033	0.00523392		77.3769	2.41351	1.28745	-0.000774208		88.4686	1.58341	-8.98095	0.0293325		99.5238	2.41483	1.42041	-0.00299517
					10.9892	2.4221	2.79198	-0.0215196		22.0646	1.5793	-10.165	0.00841758		33.1435	2.42336	1.70272	-0.031302		44.2022	1.57879	-9.85193	-0.0197485		55.2995	2.42543	1.23663	-0.0286088		66.3553	1.57789	-9.75773	0.0100879		77.4114	2.41972	1.40891	0.000770761		88.5006	1.57765	-9.77115	0.0294497		99.5561	2.42064	1.29725	-0.0047773
					11.0233	2.42823	2.89278	-0.0214198		22.0911	1.57453	-10.866	0.00743639		33.1758	2.42917	1.58133	-0.0305822		44.2335	1.57314	-10.782	-0.0205738		55.3306	2.43104	1.28497	-0.0264401		66.3886	1.5719	-10.2874	0.0120728		77.4439	2.42558	1.2915	0.00190219		88.5336	1.57171	-10.2339	0.0270377		99.5857	2.42596	1.39727	-0.00506876
					11.0561	2.43415	2.7036	-0.0222392		22.123	1.56878	-12.0016	0.00820056		33.2129	2.43586	1.57743	-0.0306819		44.2684	1.56687	-11.6652	-0.0191587		55.3653	2.43728	1.37555	-0.0237749		66.4201	1.56622	-11.5974	0.0109931		77.4779	2.4317	1.40934	-0.00224045		88.5672	1.56566	-11.7357	0.0309246		99.6247	2.43298	1.11205	-0.00370545
					11.0884	2.43996	2.59968	-0.0205262		22.1573	1.5626	-13.0303	0.00852837		33.2481	2.44218	1.48408	-0.0313305		44.3013	1.56094	-13.0624	-0.0206761		55.397	2.44298	1.34751	-0.0266252		66.4561	1.55975	-13.5211	0.0136724		77.511	2.43765	1.40742	-0.00672229		88.6019	1.55941	-13.0954	0.0327415		99.6576	2.43891	1.47791	-0.00635255
					11.1222	2.44603	1.96415	-0.0216147		22.19	1.55671	-15.6132	0.00930761		33.2746	2.44696	1.35894	-0.0314254		44.336	1.55469	-16.7753	-0.0164451		55.4321	2.44931	1.47478	-0.0272385		66.4893	1.55377	-17.8475	0.0158519		77.5445	2.44369	1.34481	-0.00765088		88.6343	1.55359	-17.5769	0.0297456		99.6909	2.44489	1.19766	-0.0084932
					11.1558	2.45209	1.96614	-0.0219272		22.2246	1.55049	-24.7261	0.00986976		33.3126	2.4538	1.54399	-0.0299107		44.3678	1.54897	-27.3621	-0.0152056		55.4642	2.45508	1.40068	-0.0270807		66.523	1.54771	-29.0305	0.0195056		77.5792	2.44993	1.44305	-0.00883806		88.6678	1.54755	-28.9367	0.029529		99.7231	2.45069	1.13611	-0.00702088
					11.1887	2.45802	2.00731	-0.0209483		22.2587	1.54435	-37.6414	0.0125648		33.3459	2.4598	1.39869	-0.0313958		44.4008	1.54303	-40.0121	-0.0157151		55.4983	2.46122	1.46676	-0.0292562		66.5584	1.54133	-41.4889	0.0195721		77.6129	2.456	1.11319	-0.00686956		88.7014	1.5415	-40.9734	0.0319062		99.7571	2.45681	1.42325	-0.00950365
					11.2213	2.46387	1.84284	-0.0198424		22.293	1.53818	-50.7862	0.0149337		33.3782	2.46561	1.62279	-0.0307151		44.4352	1.53684	-52.7293	-0.0108973		55.5334	2.46753	1.19631	-0.0321823		66.5876	1.53607	-53.3784	0.0234083		77.6446	2.4617	1.1983	-0.002116		88.7336	1.5357	-53.0199	0.0305008		99.7906	2.46285	1.16699	-0.0102572
					11.2567	2.47026	1.70158	-0.0209269		22.3258	1.53229	-64.0715	0.0154536		33.4105	2.47142	1.30108	-0.0284197		44.4695	1.53067	-65.0558	-0.0100604		55.5643	2.47309	1.18048	-0.0311955		66.6226	1.52978	-65.3026	0.0248678		77.6777	2.46767	1.23755	0.00237193		88.767	1.52969	-64.6902	0.0296283		99.8248	2.469	1.31287	-0.00785722
					11.29	2.47624	1.46627	-0.0209455		22.3593	1.52624	-77.2279	0.0146873		33.4445	2.47753	1.72252	-0.0285023		44.5021	1.52479	-77.2903	-0.00963276		55.5986	2.47926	1.36405	-0.0298146		66.6556	1.52384	-77.0943	0.0236893		77.7109	2.47364	1.40834	0.00807988		88.801	1.52358	-75.9312	0.0351503		99.8573	2.47485	1.35553	-0.00946039
					11.3226	2.48212	1.55677	-0.0208948		22.3921	1.52035	-89.9422	0.014226		33.4782	2.4836	1.26353	-0.0317797		44.5334	1.51916	-89.468	-0.0101081		55.631	2.48511	1.21313	-0.0310343		66.6914	1.51739	-88.7851	0.0194744		77.7447	2.47972	1.23102	0.00885381		88.8336	1.51771	-87.2987	0.0379427		99.8905	2.48083	1.40053	-0.01239
					11.3562	2.48817	1.41267	-0.0208641		22.4244	1.51454	-102.274	0.0110008		33.5107	2.48945	1.50999	-0.0304187		44.5676	1.51301	-100.552	-0.00834925		55.6654	2.4913	1.4838	-0.0325012		66.723	1.51171	-99.5585	0.0195677		77.7776	2.48565	1.39116	0.00896144		88.8683	1.51146	-97.9185	0.0378278		99.9238	2.48682	1.19823	-0.010399
					11.3899	2.49422	1.79358	-0.0210649		22.4581	1.50847	-114.734	0.00755069		33.5463	2.49586	1.42886	-0.0312299		44.5949	1.50809	-111.413	-0.0119215		55.6974	2.49706	1.31272	-0.0349666		66.7567	1.50564	-109.885	0.0201482		77.812	2.49184	1.39457	0.00578747		88.9028	1.50524	-107.891	0.0369371		99.956	2.49262	1.04121	-0.00985913
					11.4248	2.50051	1.52809	-0.0213961		22.4943	1.50194	-125.951	0.00582699		33.5781	2.50159	1.21583	-0.033904		44.6351	1.50085	-122.227	-0.0150551		55.7315	2.5032	1.00401	-0.0344527		66.7906	1.49953	-120.495	0.0186306		77.8461	2.49798	1.35801	0.00497459		88.9359	1.4993	-116.879	0.0399437		99.9904	2.49881	1.13973	-0.0081182
					11.4546	2.50588	1.42808	-0.0212382		22.5256	1.49632	-136.713	0.00319		33.6122	2.50773	1.17856	-0.0326053		44.6688	1.49478	-132.203	-0.0173461		55.7629	2.50884	1.20646	-0.0353218		66.8237	1.49357	-129.062	0.0194485		77.8795	2.50399	1.44745	0.00185293		88.9685	1.49343	-125.82	0.0370193		100.018	2.5038	1.14314	-0.00565074
					11.4894	2.51214	1.4378	-0.020613		22.5588	1.49035	-145.66	0.00116694		33.6438	2.5134	1.16664	-0.0312138		44.7027	1.48869	-140.604	-0.0189937		55.7982	2.5152	1.22059	-0.0342301		66.8561	1.48775	-137.056	0.0179729		77.9127	2.50996	1.19631	-0.000492508		89.0027	1.48726	-133.374	0.0372268		100.058	2.51093	1.0652	-0.00447821
					11.5245	2.51846	1.42005	-0.0217503		22.5916	1.48443	-154.362	-0.00114669		33.6778	2.51954	1.22115	-0.0291383		44.7362	1.48266	-148.622	-0.0215492		55.8308	2.52108	1.51645	-0.034494		66.8904	1.48158	-144.775	0.0150517		77.9452	2.51581	1.21604	-0.00186511		89.0358	1.48131	-140.899	0.0398209		100.089	2.51658	1.0816	-0.00336749
					11.5566	2.52424	1.39287	-0.0206402		22.6218	1.479	-162.137	-0.0028621		33.7113	2.52556	1.48671	-0.0264068		44.7709	1.47642	-155.673	-0.02351		55.8651	2.52725	1.33246	-0.0307039		66.9239	1.47555	-151.361	0.00544978		77.9799	2.52206	1.24266	-0.00351493		89.0696	1.47523	-147.401	0.0410847		100.123	2.52272	1.27624	-0.0073071
					11.5916	2.53053	1.22172	-0.0199215		22.6608	1.47198	-169.209	-0.00616016		33.7451	2.53165	1.41395	-0.0240324		44.8035	1.47054	-161.923	-0.024434		55.8992	2.53338	1.36305	-0.0307277		66.9569	1.46961	-156.899	0.00131167		78.0125	2.52794	1.10779	-0.00587992		89.102	1.46939	-153.204	0.0358876		100.158	2.52899	1.14477	-0.00711753
					11.6245	2.53645	1.34822	-0.0186172		22.6936	1.46607	-174.71	-0.00841828		33.7807	2.53806	1.35446	-0.0251564		44.8365	1.4646	-167.491	-0.0304769		55.9297	2.53888	1.18091	-0.0311691		66.9901	1.46362	-161.956	-0.00111556		78.0443	2.53365	1.01296	-0.00720012		89.1351	1.46344	-158.042	0.0317588		100.189	2.53464	1.00337	-0.00911645
					11.6571	2.54232	1.24501	-0.0175544		22.727	1.46006	-179.391	-0.0114788		33.8121	2.54371	1.34964	-0.0247491		44.8621	1.46	-171.696	-0.0372942		55.9664	2.54547	1.25963	-0.0330273		67.024	1.45752	-166.627	-0.00446879		78.0798	2.54005	1.39116	-0.0074659		89.1692	1.45729	-162.037	0.0286458		100.224	2.54086	1.22335	-0.00589192
					11.6901	2.54826	1.32912	-0.0177749		22.7597	1.45418	-182.442	-0.0160302		33.8452	2.54967	1.28036	-0.0259053		44.9045	1.45237	-174.361	-0.041331		55.9995	2.55143	1.25885	-0.0306368		67.0576	1.45148	-169.588	-0.00889362		78.1135	2.5461	1.27801	-0.0104998		89.2017	1.45145	-165.277	0.0237375		100.26	2.54726	1.06768	-0.00604388
					11.7228	2.55415	1.35943	-0.0190094		22.7936	1.44808	-184.523	-0.020825		33.8801	2.55594	1.07656	-0.0284364		44.9363	1.44664	-176.212	-0.0495358		56.0335	2.55756	1.20951	-0.0321033		67.0904	1.44558	-171.465	-0.0120415		78.1472	2.55217	1.10311	-0.00670721		89.2349	1.44548	-167.198	0.0173205		100.293	2.55327	1.09239	-0.00247043
					11.7571	2.56032	1.32437	-0.0186977		22.8295	1.44162	-183.343	-0.0251119		33.913	2.56186	1.04547	-0.0311819		44.9701	1.44056	-175.98	-0.0559398		56.0642	2.56308	1.38513	-0.0296846		67.1229	1.43972	-170.844	-0.0176537		78.1799	2.55806	1.20185	-0.00759248		89.2667	1.43975	-167.789	0.0125141		100.329	2.55979	1.04057	-0.0032565
					11.7894	2.56614	1.34012	-0.0200852		22.8597	1.43618	-178.828	-0.0289205		33.9472	2.56802	1.18808	-0.0316504		45.0058	1.43414	-172.716	-0.0603583		56.0987	2.56929	1.3502	-0.0283961		67.1576	1.43348	-168.129	-0.0228783		78.2136	2.56412	1.23613	-0.0056986		89.3033	1.43316	-165.431	0.0113421		100.357	2.56472	1.13895	-0.00275825
					11.8242	2.57239	1.35056	-0.022449		22.8934	1.43011	-167.74	-0.0341862		33.9803	2.57398	1.03482	-0.030995		45.0366	1.42859	-163.718	-0.0650619		56.133	2.57547	1.04185	-0.0246115		67.1897	1.42769	-161.041	-0.0306535		78.2446	2.56971	1.31187	-0.00354864		89.338	1.42691	-160.585	0.00928531		100.393	2.57128	1.10438	-0.00554284
					11.8567	2.57826	1.21086	-0.0219294		22.9262	1.42421	-144.927	-0.0369624		34.0138	2.58	1.10957	-0.0331316		45.0702	1.42253	-145.589	-0.070795		56.1672	2.58162	0.902503	-0.0244312		67.2233	1.42166	-146.519	-0.0339863		78.2784	2.5758	0.996274	-0.00233098		89.3692	1.42129	-148.539	0.00473256		100.426	2.57718	1.54449	-0.00607615
					11.89	2.58425	1.19453	-0.0231641		22.9613	1.41788	-108.627	-0.0401765		34.0467	2.58594	1.29945	-0.0328792		45.1038	1.41649	-115.346	-0.0726964		56.199	2.58734	0.950134	-0.0217097		67.2565	1.41567	-120.588	-0.0380899		78.3128	2.58199	1.19851	-0.00580433		89.4024	1.41532	-127.407	0.00131722		100.459	2.58318	1.12596	-0.0068412
					11.9233	2.59024	1.10836	-0.0235637		22.9931	1.41216	-70.3848	-0.0422229		34.0826	2.5924	1.16621	-0.0321595		45.1364	1.41062	-78.8316	-0.0734456		56.2342	2.59368	1.54839	-0.0243024		67.2906	1.40953	-87.3943	-0.0397792		78.3466	2.58807	1.14286	-0.00112895		89.4387	1.40879	-97.5466	0.00112617		100.493	2.58936	0.918971	-0.00537656
					11.9567	2.59624	1.27886	-0.0237143		23.026	1.40625	-51.5567	-0.0414885		34.1145	2.59814	1.21398	-0.0314576		45.1699	1.40459	-54.229	-0.0731151		56.2678	2.59972	0.985484	-0.0248175		67.3251	1.40332	-58.4811	-0.0409757		78.3788	2.59386	1.15457	0.00313224		89.4689	1.40336	-67.0503	-0.00316423		100.527	2.59533	1.02992	-0.00529064
					11.9916	2.60253	1.29817	-0.0206811		23.0605	1.40003	-44.4491	-0.0398042		34.1456	2.60374	1.0921	-0.0346471		45.2033	1.39858	-43.3228	-0.0706193		56.2995	2.60544	0.948075	-0.0264569		67.3585	1.39731	-44.3929	-0.0322595		78.4127	2.59996	1.02871	-0.000211668		89.5027	1.39727	-48.4555	-0.0062369		100.558	2.601	0.724543	-0.00476565
					12.0294	2.60934	1.0405	-0.0225286		23.095	1.39382	-40.1028	-0.0373451		34.1801	2.60995	1.11603	-0.0335937		45.2375	1.39243	-38.7668	-0.0680485		56.3313	2.61116	1.06861	-0.0264773		67.3925	1.39119	-37.6769	-0.030484		78.4469	2.60612	1.02864	0.000950628		89.535	1.39146	-39.3245	-0.00653559		100.593	2.60722	1.08635	-0.005569
					12.0525	2.61349	1.31911	-0.0203632		23.1267	1.38812	-36.7509	-0.0356106		34.2123	2.61575	1.10296	-0.0335314		45.278	1.38513	-35.3319	-0.0635737		56.3665	2.61749	0.975404	-0.0274072		67.4249	1.38536	-34.2954	-0.0262092		78.4807	2.61221	1.03382	0.00585659		89.5655	1.38596	-34.6324	-0.0057997		100.626	2.61325	0.923656	-0.00518156
					12.092	2.62061	1.08983	-0.0203654		23.1599	1.38214	-34.5124	-0.03579		34.2467	2.62193	1.03028	-0.0322896		45.3042	1.38042	-32.796	-0.0586135		56.4005	2.62362	1.09508	-0.0267576		67.4578	1.37943	-31.7705	-0.0224005		78.5135	2.6181	1.02502	0.00320014		89.6044	1.37896	-32.4851	-0.00620467		100.659	2.61909	0.908607	-0.00822284
					12.1263	2.62678	1.05093	-0.0209665		23.1923	1.37631	-32.8244	-0.0386276		34.2814	2.62818	1.2668	-0.033533		45.3369	1.37453	-31.3946	-0.0568872		56.4314	2.62917	1.14918	-0.0255375		67.4914	1.37339	-29.5295	-0.0207752		78.5469	2.62412	1.03794	-0.00205378		89.6368	1.37314	-30.0848	-0.00718244		100.693	2.62533	1.06839	-0.00562273
					12.1539	2.63175	1.23997	-0.0232223		23.2273	1.37	-31.5558	-0.0367254		34.3156	2.63434	0.808945	-0.0309052		45.3698	1.36861	-29.4338	-0.0537827		56.4686	2.63587	0.960852	-0.025514		67.5247	1.3674	-27.8161	-0.0221886		78.5803	2.63013	0.694162	0.00218519		89.6721	1.36678	-28.1986	-0.0110488		100.726	2.63124	1.04284	-0.00863994
					12.1921	2.63863	0.911305	-0.0206358		23.2606	1.36401	-30.3053	-0.0365051		34.3467	2.63993	0.939912	-0.0301373		45.4053	1.36221	-28.1175	-0.0522003		56.5004	2.6416	1.063	-0.0257043		67.5576	1.36149	-26.3577	-0.0210276		78.6144	2.63628	0.929193	0.00113667		89.7048	1.36089	-26.8119	-0.0116957		100.759	2.63719	1.07464	-0.010249
					12.2257	2.64467	0.915138	-0.0204277		23.2933	1.35813	-30.3036	-0.0354444		34.3817	2.64622	0.914357	-0.030861		45.4384	1.35627	-27.4137	-0.0538589		56.5329	2.64745	1.16259	-0.0257723		67.5923	1.35524	-25.3516	-0.0189595		78.6469	2.64212	0.903638	-0.000942433		89.7367	1.35515	-25.3818	-0.0138832		100.792	2.6431	0.947862	-0.0112296
					12.2587	2.65062	1.14023	-0.0207077		23.3284	1.35181	-28.9724	-0.0336555		34.4133	2.65191	1.02453	-0.0327053		45.4727	1.3501	-27.1112	-0.0556083		56.5665	2.6535	1.17423	-0.0259058		67.6254	1.34926	-25.0855	-0.0155434		78.6806	2.64818	1.02893	-0.00211795		89.7713	1.34892	-24.5519	-0.0138807		100.827	2.64934	1.03219	-0.0111645
					12.2998	2.65802	1.16898	-0.0193691		23.3611	1.34593	-28.7113	-0.0322322		34.4477	2.6581	0.925502	-0.0314703		45.5054	1.3442	-26.2351	-0.0549898		56.5999	2.6595	0.775582	-0.0269466		67.6589	1.34325	-24.5665	-0.0114636		78.714	2.6542	0.896043	0.00143173		89.8062	1.34265	-24.1183	-0.0135742		100.858	2.65503	0.977108	-0.0122633
					12.3264	2.6628	1.00188	-0.0182755		23.4021	1.33854	-28.5888	-0.0323516		34.4803	2.66397	1.08593	-0.0329601		45.5389	1.33817	-25.6144	-0.0593502		56.634	2.66564	0.858066	-0.0276762		67.693	1.33711	-24.2397	-0.0116574		78.7476	2.66025	1.11084	-0.00106184		89.836	1.33727	-24.2895	-0.00861421		100.893	2.66129	0.780693	-0.0106564
					12.3605	2.66893	0.901438	-0.0190095		23.4282	1.33384	-28.1844	-0.0310572		34.5129	2.66985	1.18495	-0.0347208		45.5716	1.33228	-26.0829	-0.0605139		56.6673	2.67164	0.952405	-0.0261626		67.7253	1.33129	-23.5753	-0.00662618		78.7812	2.6663	1.0165	0.000967826		89.8739	1.33045	-23.4647	-0.0109044		100.927	2.66732	0.59024	-0.00947953
					12.3973	2.67556	1.00209	-0.0192627		23.4598	1.32816	-27.7081	-0.0329494		34.548	2.67617	1.04227	-0.0336432		45.6054	1.3262	-25.2863	-0.0593176		56.7015	2.67779	0.977037	-0.0275498		67.7592	1.3252	-23.1313	-0.00476573		78.8136	2.67213	0.923585	-0.000845636		89.904	1.32503	-22.6412	-0.00811515		100.96	2.67334	0.823	-0.0089131
					12.4255	2.68063	0.901367	-0.018954		23.4963	1.32159	-27.31	-0.0327155		34.5837	2.68259	1.0121	-0.0323957		45.6389	1.32018	-24.8983	-0.0587628		56.7339	2.68362	0.944171	-0.0274581		67.7921	1.31926	-22.6473	-0.00795416		78.8472	2.67818	0.931039	-0.0022109		89.9373	1.31904	-22.2873	-0.00984264		100.993	2.67935	0.77906	-0.00949022
					12.4594	2.68674	1.19581	-0.0193236		23.5282	1.31585	-27.0358	-0.0313965		34.6162	2.68843	0.964118	-0.0330412		45.6709	1.31441	-24.4071	-0.0599888		56.7665	2.68949	0.986194	-0.0289083		67.8266	1.31306	-22.3052	-0.00953779		78.8812	2.68429	0.899095	-0.00271946		89.9692	1.3133	-21.812	-0.00540226		101.028	2.68562	1.03127	-0.0106995
					12.4944	2.69303	0.941615	-0.0201002		23.562	1.30976	-26.7214	-0.0330772		34.6511	2.69473	1.08955	-0.0303386		45.7058	1.30814	-24.2666	-0.0589435		56.8006	2.69564	1.06953	-0.0281588		67.8596	1.30712	-22.6206	-0.00908594		78.9132	2.69005	0.892423	-0.000609352		90.0044	1.30696	-21.6348	-0.00726682		101.061	2.69143	0.708075	-0.00808486
					12.5258	2.6987	0.809086	-0.0198027		23.5943	1.30395	-26.2124	-0.0334327		34.6814	2.70019	0.962911	-0.0276144		45.7378	1.30236	-23.7013	-0.0579411		56.8359	2.70199	1.16344	-0.0279235		67.8935	1.30101	-21.8975	-0.0129488		78.9484	2.6964	0.734055	-0.00441027		90.0376	1.30099	-21.2785	-0.00310602		101.093	2.69727	0.893984	-0.00837615
					12.5593	2.70471	1.19695	-0.020953		23.6297	1.29757	-26.3181	-0.0336676		34.7161	2.70643	1.0126	-0.0266577		45.7715	1.2963	-23.4515	-0.0585491		56.8671	2.7076	0.847063	-0.027382		67.926	1.29516	-21.6558	-0.0151356		78.9808	2.70223	0.995777	-0.00365932		90.0699	1.29518	-20.8258	-0.00488756		101.13	2.70386	0.902077	-0.0110489
					12.5919	2.71059	1.00969	-0.0208198		23.662	1.29176	-25.7323	-0.0344386		34.7479	2.71215	1.06577	-0.0273321		45.8038	1.2905	-23.1018	-0.0589216		56.9013	2.71376	1.00472	-0.0260387		67.9604	1.28897	-21.1351	-0.0140049		79.0148	2.70834	0.837338	-0.00233128		90.1044	1.28896	-20.8805	-0.00556283		101.161	2.7095	0.782893	-0.0128098
					12.626	2.71673	1.04752	-0.0212331		23.6952	1.28579	-25.3291	-0.0348423		34.7814	2.71817	0.723124	-0.0265695		45.838	1.28433	-23.3614	-0.057373		56.9342	2.71968	0.829175	-0.0246889		67.9911	1.28345	-20.7177	-0.0136587		79.0481	2.71434	0.852671	-0.0040623		90.1376	1.28299	-20.2891	-0.00883679		101.195	2.71572	0.944952	-0.0128809
					12.6594	2.72273	1.01956	-0.0208585		23.7342	1.27877	-25.1392	-0.0349714		34.8156	2.72434	1.06506	-0.0286114		45.8698	1.27861	-22.9658	-0.0540133		56.9674	2.72566	1.03645	-0.0254917		68.0257	1.27721	-20.6949	-0.0142777		79.0799	2.72006	0.852316	-0.0033223		90.17	1.27715	-19.9159	-0.0098014		101.227	2.72132	0.634889	-0.0154214
					12.6934	2.72886	0.861828	-0.0196365		23.7606	1.27401	-24.5881	-0.0364298		34.8478	2.73014	0.885892	-0.0283252		45.9064	1.27203	-22.4419	-0.0548048		57.0013	2.73175	0.771252	-0.0290962		68.0608	1.27091	-20.5298	-0.0127194		79.1137	2.72615	0.806744	-0.000486348		90.2065	1.27058	-20.1111	-0.0124684		101.261	2.72751	0.904348	-0.016255
					12.7254	2.73462	0.993718	-0.017648		23.7953	1.26777	-24.3953	-0.0354756		34.8821	2.73631	0.859486	-0.029309		45.9379	1.26634	-21.8044	-0.0553925		57.0326	2.7374	0.933452	-0.0266361		68.0926	1.26518	-20.7146	-0.00933682		79.1482	2.73235	0.844437	-0.000385046		90.2394	1.26466	-19.5372	-0.0117694		101.296	2.73381	0.842236	-0.013082
					12.7583	2.74053	1.04014	-0.0168932		23.8269	1.26208	-23.8597	-0.0357407		34.9196	2.74306	1.0043	-0.0280766		45.9722	1.26018	-21.5006	-0.0566387		57.0635	2.74295	0.939415	-0.0284252		68.1256	1.25923	-19.9771	-0.00706919		79.1822	2.73848	0.685005	-0.000466679		90.2725	1.25871	-19.1727	-0.0126933		101.328	2.73962	0.685715	-0.0126151
					12.7929	2.74678	0.957729	-0.0174238		23.8626	1.25566	-23.9505	-0.0369242		34.9477	2.74811	0.787436	-0.0288301		46.0047	1.25432	-21.515	-0.0587528		57.1027	2.75	0.963479	-0.0281806		68.1598	1.25308	-19.6906	-0.00714677		79.2141	2.74423	0.934801	-0.000282698		90.3052	1.25283	-18.7123	-0.0137517		101.36	2.74539	0.849832	-0.0106625
					12.8272	2.75295	0.842946	-0.0182889		23.8946	1.24989	-23.8805	-0.0356296		34.9812	2.75414	1.05555	-0.0279535		46.0374	1.24844	-21.0917	-0.0611599		57.1343	2.75569	0.892849	-0.0282501		68.195	1.24675	-19.3195	-0.00541439		79.2487	2.75045	0.991376	-0.00187152		90.3386	1.24681	-18.0047	-0.0145273		101.387	2.75028	0.889299	-0.00699819
					12.8609	2.759	0.894197	-0.0178467		23.9286	1.24377	-23.2579	-0.0350837		35.0124	2.75977	0.692813	-0.0276362		46.0724	1.24213	-21.5098	-0.059772		57.1679	2.76175	1.03716	-0.0280239		68.2259	1.24119	-19.1761	-0.00882339		79.283	2.75663	0.968945	0.00131787		90.3707	1.24103	-18.1123	-0.0140246		101.428	2.75763	0.765218	-0.00544123
					12.8915	2.76451	0.902432	-0.0173451		23.9616	1.23784	-22.866	-0.0336236		35.048	2.76616	0.982787	-0.0266869		46.1065	1.236	-20.5479	-0.0586211		57.1992	2.76737	0.901367	-0.0301703		68.2604	1.23498	-18.5909	-0.0112116		79.3152	2.76241	0.913008	0.00284039		90.4049	1.23488	-17.5603	-0.0129264		101.461	2.76346	0.660586	-0.00616817
					12.9271	2.77092	1.02729	-0.0177967		23.994	1.23201	-22.6301	-0.0342995		35.082	2.77228	0.68394	-0.0272036		46.1391	1.23014	-20.2349	-0.0555831		57.2341	2.77367	0.921882	-0.0297693		68.2941	1.2289	-18.3451	-0.0143273		79.3491	2.76852	0.691464	0.00413007		90.439	1.22874	-17.5769	-0.00892522		101.494	2.76941	0.686637	-0.00611986
					12.9587	2.7766	0.692955	-0.0169517		24.0301	1.22551	-22.7436	-0.0361343		35.1136	2.77798	0.981793	-0.0281446		46.1744	1.22379	-20.0677	-0.0544966		57.2675	2.77968	0.711695	-0.0291964		68.3268	1.22302	-17.7348	-0.0155493		79.3818	2.77441	0.715031	0.000289179		90.4705	1.22307	-17.325	-0.00462639		101.528	2.77561	0.832583	-0.00938987
					12.9946	2.78306	0.987188	-0.016969		24.0627	1.21963	-22.2519	-0.0357378		35.1484	2.78423	0.830311	-0.0257743		46.2055	1.21818	-19.7736	-0.05429		57.302	2.78588	0.821154	-0.0282286		68.3605	1.21696	-17.6315	-0.0149525		79.4156	2.78049	0.839539	0.00417057		90.51	1.21596	-16.9998	-0.00165206		101.561	2.78154	0.75819	-0.0109115
					13.0272	2.78895	0.754925	-0.0188633		24.0969	1.21349	-22.1686	-0.034866		35.1819	2.79027	0.882343	-0.0254991		46.2405	1.21188	-19.6155	-0.0549108		57.3355	2.79191	0.754925	-0.0274943		68.3883	1.21196	-17.2853	-0.0119664		79.4502	2.78672	0.73583	0.00506727		90.5392	1.2107	-16.491	-0.000319277		101.594	2.78751	0.736256	-0.00992326
					13.0608	2.795	0.918758	-0.0200417		24.1302	1.20748	-21.8683	-0.032768		35.215	2.79623	0.845928	-0.0262516		46.275	1.20567	-19.5175	-0.0524126		57.3688	2.7979	0.867507	-0.0276052		68.427	1.20498	-17.9301	-0.0130097		79.4836	2.79273	1.08011	0.00301224		90.5713	1.20491	-16.2308	-0.000408782		101.627	2.79349	0.776646	-0.0121047
					13.0938	2.80094	0.722059	-0.0194228		24.1626	1.20165	-21.8429	-0.0295013		35.2547	2.80337	0.667188	-0.0263163		46.3061	1.20008	-19.1	-0.0554001		57.4026	2.80399	0.867436	-0.0286985		68.4621	1.19867	-17.4681	-0.00860234		79.5153	2.79843	0.881846	0.00436623		90.6052	1.19881	-15.9696	-0.00122099		101.663	2.79988	0.687134	-0.00865537
					13.1268	2.80687	0.832653	-0.0189351		24.198	1.19528	-21.8154	-0.0276253		35.282	2.80829	0.850684	-0.0239539		46.3415	1.19371	-19.1221	-0.0556667		57.436	2.81	1.03993	-0.0288764		68.4939	1.19294	-17.0931	-0.00852668		79.5487	2.80445	0.631198	0.0100413		90.6363	1.19322	-15.7447	0.00110173		101.697	2.80596	0.81441	-0.0102116
					13.1604	2.81292	0.902787	-0.0184434		24.2309	1.18936	-21.9757	-0.0295296		35.3169	2.81457	0.976043	-0.0265656		46.3736	1.18793	-18.7488	-0.0544652		57.4685	2.81586	0.825413	-0.0293819		68.5299	1.18646	-17.1633	-0.0126054		79.5824	2.81051	0.645963	0.00642552		90.6737	1.18649	-15.8621	0.0023536		101.728	2.81155	0.850116	-0.0120868
					13.1933	2.81884	0.980586	-0.0192148		24.264	1.1834	-21.7801	-0.0287621		35.3504	2.8206	0.801562	-0.0286697		46.4068	1.18194	-19.181	-0.0532436		57.501	2.82171	0.799575	-0.0295359		68.5606	1.18093	-16.5779	-0.0127644		79.6151	2.8164	0.652494	0.00302552		90.7046	1.18093	-15.758	0.00168086		101.763	2.81791	0.575901	-0.0144534
					13.2205	2.82373	1.04916	-0.0191013		24.297	1.17746	-21.4662	-0.0311382		35.3855	2.82692	0.899876	-0.0288595		46.441	1.17579	-18.7243	-0.0527666		57.535	2.82782	0.709637	-0.0272174		68.5935	1.17501	-16.9161	-0.0127937		79.6488	2.82246	0.905129	0.00259666		90.739	1.17474	-15.4787	0.00104065		101.797	2.82391	0.806389	-0.0101634
					13.2597	2.8308	0.831305	-0.0198631		24.3306	1.17142	-21.7635	-0.0326745		35.4172	2.83263	0.768909	-0.0284195		46.4751	1.16965	-18.3153	-0.0503443		57.5689	2.83393	0.588394	-0.0251851		68.6281	1.16879	-16.7778	-0.0156132		79.6866	2.82927	0.777924	-0.0013696		90.7716	1.16887	-15.2308	0.000685526		101.829	2.8297	0.745484	-0.0126858
					13.293	2.83679	0.944455	-0.0211816		24.3638	1.16543	-21.8955	-0.0349992		35.4508	2.83867	0.993718	-0.0272012		46.5051	1.16425	-18.4236	-0.0495498		57.6021	2.8399	0.681314	-0.0250074		68.66	1.16304	-16.4688	-0.0129379		79.7147	2.83433	0.67528	-0.00361314		90.8056	1.16274	-15.3864	-0.00328893		101.862	2.83576	0.807241	-0.0118266
					13.3271	2.84292	0.646531	-0.021142		24.3968	1.1595	-21.9659	-0.0349438		35.4834	2.84453	0.605289	-0.0254781		46.5408	1.15783	-18.3652	-0.0480752		57.6345	2.84574	0.676629	-0.0220049		68.6943	1.15687	-16.6029	-0.00882457		79.7506	2.84078	0.714889	-0.00434507		90.8386	1.1568	-15.2145	-0.00589326		101.897	2.84201	0.700834	-0.0139809
					13.3602	2.84888	0.792689	-0.0203234		24.4297	1.15357	-22.2286	-0.0374528		35.5167	2.85053	0.860693	-0.0251657		46.5747	1.15173	-18.4652	-0.0493518		57.6706	2.85223	0.675422	-0.0203927		68.7274	1.15091	-16.7079	-0.0108829		79.7818	2.8464	0.844224	-0.00565722		90.8701	1.15114	-15.1023	-0.00689188		101.923	2.84663	0.954961	-0.0115771
					13.3931	2.8548	0.914783	-0.0211009		24.4541	1.14918	-22.3637	-0.0357765		35.5493	2.8564	0.837197	-0.0246962		46.5843	1.15	-18.3089	-0.0511442		57.7026	2.85798	0.847915	-0.0212463		68.7604	1.14498	-16.6097	-0.00819604		79.8165	2.85265	0.430098	-0.00695881		90.9054	1.14479	-15.3352	-0.00674749		101.962	2.85362	0.618137	-0.0131423
					13.4269	2.8609	0.915635	-0.0199037		24.4967	1.14151	-22.1317	-0.0336377		35.5828	2.86242	0.769974	-0.0240603		46.6397	1.14002	-18.6644	-0.0529685		57.7398	2.86469	0.677906	-0.0201516		68.7923	1.13923	-16.4019	-0.00959917		79.8493	2.85855	0.716735	-0.00569528		90.9401	1.13853	-15.2622	-0.00706008		101.995	2.8596	0.480284	-0.0119457
					13.4613	2.86708	0.686283	-0.0190779		24.529	1.13569	-21.9321	-0.029214		35.6177	2.86871	0.771039	-0.0245061		46.6738	1.13389	-18.5999	-0.0531847		57.769	2.86994	0.834783	-0.0192124		68.8272	1.13294	-16.5902	-0.0120383		79.8843	2.86485	0.552192	-0.00754536		90.9725	1.1327	-15.0896	-0.0053097		102.028	2.86563	0.659947	-0.0118914
					13.4946	2.87307	0.894552	-0.0179684		24.5632	1.12955	-22.2185	-0.027168		35.6524	2.87495	0.917906	-0.0254419		46.7075	1.12782	-18.6231	-0.0552751		57.8046	2.87634	0.61693	-0.0238216		68.8611	1.12685	-16.3668	-0.0148521		79.9189	2.87108	0.857569	-0.00715978		91.0084	1.12624	-15.7239	-0.00263128		102.063	2.87185	0.695653	-0.0103957
					13.5304	2.87952	0.90804	-0.0174782		24.5968	1.1235	-22.1339	-0.0245678		35.6838	2.88061	0.849335	-0.0256357		46.7395	1.12206	-18.6361	-0.0555177		57.836	2.882	0.712121	-0.0228047		68.8949	1.12076	-16.3527	-0.0129097		79.9523	2.87709	0.83024	-0.00556872		91.0404	1.12048	-15.8995	-0.00326379		102.091	2.87685	0.638084	-0.0126197
					13.562	2.8852	0.832795	-0.0178779		24.6361	1.11643	-22.0175	-0.024589		35.7158	2.88637	0.610045	-0.0271632		46.7756	1.11557	-19.0976	-0.0562075		57.8698	2.8881	0.693949	-0.0249854		68.9279	1.11483	-16.4259	-0.0118388		79.9842	2.88284	0.493487	-0.00113907		91.0728	1.11465	-15.5063	-0.00256697		102.125	2.883	0.563904	-0.0119108
					13.5951	2.89116	0.851677	-0.0196387		24.6635	1.11149	-22.0968	-0.0264813		35.7528	2.89303	0.707791	-0.0269081		46.8083	1.10969	-19.0656	-0.055473		57.9022	2.89392	0.845999	-0.0257734		68.9602	1.10901	-16.3615	-0.0074165		80.0168	2.8887	0.825484	-0.000444585		91.1063	1.10863	-15.719	-0.000313573		102.162	2.88969	0.560284	-0.0128467
					13.6276	2.89701	0.868714	-0.0186963		24.6967	1.10551	-22.7	-0.0280655		35.7785	2.89766	0.684295	-0.0291071		46.8422	1.10357	-19.1969	-0.0533794		57.9353	2.89988	0.749743	-0.0284232		68.9947	1.1028	-16.5134	-0.00706509		80.0511	2.89488	0.812849	-0.00064971		91.1391	1.10271	-15.6214	-0.00181868		102.196	2.89576	0.547152	-0.0107526
					13.6613	2.90307	0.964686	-0.0201744		24.731	1.09934	-21.9483	-0.0270854		35.8139	2.90402	0.683372	-0.0280116		46.8749	1.09769	-18.904	-0.0508764		57.9693	2.906	0.63418	-0.0259408		69.0288	1.09666	-16.795	-0.00504139		80.0839	2.90078	0.746833	-0.00325639		91.1725	1.0967	-15.7037	-0.00573024		102.227	2.90146	0.547223	-0.0106197
					13.6959	2.90932	0.679184	-0.0188231		24.7644	1.09332	-22.1216	-0.0272783		35.8525	2.91097	0.792476	-0.0296916		46.9078	1.09177	-19.0346	-0.0500666		58.0052	2.91246	0.904632	-0.0263687		69.0641	1.09031	-16.5073	-0.00621645		80.1179	2.90691	0.632192	-0.00551533		91.2071	1.09049	-16.0542	-0.00393086		102.259	2.90725	0.573345	-0.0106162
					13.7295	2.91535	0.994499	-0.0177354		24.7988	1.08714	-22.2672	-0.0289464		35.8853	2.91688	0.622964	-0.0282796		46.9402	1.08594	-19.1761	-0.0489425		58.0381	2.91838	0.731145	-0.0240855		69.0949	1.08476	-16.6514	-0.00817278		80.1507	2.9128	0.694091	-0.0075564		91.2399	1.08457	-15.5109	-0.00514994		102.295	2.91365	0.466584	-0.0107589
					13.7621	2.92123	1.02382	-0.0173401		24.8255	1.08233	-22.0426	-0.0267136		35.9187	2.92289	0.668039	-0.0294971		46.9742	1.07981	-19.0569	-0.047812		58.0714	2.92438	0.741154	-0.0253601		69.1271	1.07897	-16.1658	-0.00902444		80.1836	2.91873	0.763585	-0.00767052		91.2743	1.07838	-16.0812	-0.00402833		102.329	2.91968	0.464809	-0.00790444
					13.7954	2.92722	0.959291	-0.0170128		24.8652	1.07519	-23.1434	-0.0250646		35.9512	2.92873	0.708856	-0.0301279		47.0077	1.07378	-19.39	-0.0477707		58.1044	2.93032	0.698492	-0.0238606		69.1612	1.07283	-16.085	-0.00828997		80.2167	2.92469	0.64866	-0.00548108		91.3066	1.07257	-15.7657	-0.0025006		102.364	2.92603	0.710843	-0.00823634
					13.8288	2.93324	0.452458	-0.016573		24.8975	1.06937	-23.3684	-0.0247432		35.9833	2.93452	0.673292	-0.0340255		47.041	1.0678	-19.2031	-0.0490146		58.137	2.93618	0.697498	-0.0221449		69.1974	1.0663	-16.1094	-0.00743793		80.2496	2.93061	0.655191	-0.00405508		91.3398	1.06659	-15.594	0.00170715		102.396	2.93188	0.461899	-0.00894988
					13.8605	2.93894	0.859699	-0.017852		24.9312	1.06331	-23.5725	-0.025301		36.0174	2.94065	0.471056	-0.0330151		47.0735	1.06195	-19.4309	-0.0480812		58.1708	2.94227	0.629991	-0.0223435		69.2266	1.06106	-15.7655	-0.00252128		80.2833	2.93668	0.798368	-0.00187378		91.3734	1.06054	-15.8672	0.005534		102.431	2.93813	0.609406	-0.00557695
					13.8955	2.94523	0.874251	-0.0191257		24.9646	1.0573	-23.5692	-0.0257877		36.0516	2.94681	0.595209	-0.0330899		47.1079	1.05576	-19.2275	-0.045928		58.2046	2.94834	0.819876	-0.0251138		69.2613	1.05482	-16.2016	-0.000832965		80.3181	2.94293	0.74591	-0.000645231		91.4066	1.05457	-15.5616	0.0056497		102.463	2.94392	0.710488	-0.0063833
					13.9248	2.95051	0.849264	-0.0192435		24.9984	1.05122	-24.1333	-0.0262223		36.0863	2.95306	0.692884	-0.0329383		47.1405	1.04988	-19.0078	-0.0458818		58.2381	2.95438	0.570506	-0.0241293		69.2959	1.04859	-16.0733	-0.0030971		80.3505	2.94876	0.734126	-0.000788757		91.44	1.04856	-15.308	0.00451338		102.497	2.94994	0.420941	-0.0078632
					13.9716	2.95894	0.735404	-0.0201261		25.0317	1.04522	-23.8681	-0.0258999		36.1204	2.9592	0.803266	-0.0312261		47.1748	1.04371	-18.8038	-0.0465261		58.2711	2.96033	0.786655	-0.0243215		69.3275	1.04289	-16.1345	0.00080721		80.3863	2.95522	0.607276	-0.000124768		91.4732	1.04258	-15.2245	0.000281215		102.531	2.95618	0.646815	-0.00827471
					13.9934	2.96285	0.584774	-0.019535		25.0655	1.03914	-24.2586	-0.0249839		36.1517	2.96484	0.81796	-0.0288408		47.2072	1.03788	-18.6716	-0.044661		58.3039	2.96622	0.768057	-0.0262207		69.3623	1.03664	-15.7561	0.00240008		80.4171	2.96076	0.684508	0.000645277		91.51	1.03595	-15.2481	0.000791187		102.565	2.96221	0.621473	-0.00675925
					14.0296	2.96937	0.588323	-0.0210327		25.0988	1.03314	-24.1721	-0.0232106		36.1841	2.97067	0.619557	-0.0270165		47.2418	1.03164	-18.7672	-0.0433634		58.3376	2.9723	0.676345	-0.0263843		69.3956	1.03063	-15.8744	0.00111925		80.451	2.96687	0.7041	-4.2668e-05		91.5411	1.03035	-15.0054	0.000455903		102.597	2.96796	0.599113	-0.0117096
					14.0615	2.97512	0.613807	-0.0199724		25.1328	1.02702	-24.6167	-0.0199078		36.2166	2.97652	0.64213	-0.0284639		47.2741	1.02584	-18.54	-0.043891		58.3708	2.97827	0.673931	-0.0234988		69.4284	1.02474	-16.0303	0.000480361		80.4833	2.97266	0.474392	-0.000624726		91.5741	1.02443	-14.9413	0.00425751		102.63	2.97395	0.605999	-0.01183
					14.0932	2.98083	0.720852	-0.0180113		25.1658	1.02108	-24.2744	-0.0200927		36.2501	2.98254	0.530542	-0.0286884		47.3076	1.01981	-18.556	-0.0451897		58.4035	2.98416	0.541757	-0.0213566		69.4615	1.01878	-16.0222	0.00178051		80.517	2.97873	0.531819	0.00168857		91.607	1.0185	-14.9888	0.00490373		102.663	2.97982	0.322911	-0.0134676
					14.1294	2.98734	0.701615	-0.0180183		25.1979	1.0153	-24.4093	-0.0202901		36.2858	2.98897	0.529477	-0.029373		47.3428	1.01348	-18.7379	-0.0426979		58.4346	2.98975	0.657676	-0.0182382		69.4954	1.01267	-16.191	-0.00081686		80.55	2.98467	0.662999	0.0035616		91.6422	1.01217	-14.9825	0.00941265		102.697	2.98599	0.452529	-0.0145443
					14.1656	2.99385	0.674073	-0.0108499		25.2316	1.00923	-24.3691	-0.0208783		36.3186	2.99488	0.366992	-0.0311442		47.3757	1.00755	-18.3202	-0.0439552		58.4712	2.99634	0.491571	-0.0106238		69.5285	1.00672	-16.5562	-0.000112768		80.5832	2.99066	0.573062	0.00688344		91.6745	1.00635	-14.8945	0.00325439		102.73	2.99201	0.772316	-0.0133109
										25.265	1.00323	-24.3334	-0.0246669							47.4105	1.00128	-18.7471	-0.0360599												80.618	2.99692	0.648944	0.0123217							102.764	2.99813	0.54126	-0.0176187











































































































[truncated: 18 more columns]

## Sheet: Stress Data
Stress Charg Pot (V)	Stress_Charg. Curr (uA/cm^2)	Stress_Charg Str Thick (N/(m))		Strain_discharge_volt (V)	Strain__discharge_cur (uA/g)	Stress_discharge_stress_thickness (N/m)
3.00027	1.21651	0		2.99502	0.498527	0
2.99742	0.592815	0.0592386		2.98885	0.254694	0.000855716
2.99408	0.759032	0.101516		2.98337	0.42953	0.000840898
2.99099	0.652043	0.0452781		2.97706	0.442165	0.00211232
2.98797	0.646221	0.208264		2.97125	0.359184	0.00398921
2.98503	0.701442	0.408172		2.965	0.394747	0.00469523
2.98213	0.63186	0.496953		2.95886	0.392831	0.00576821
2.97935	0.700159	0.545891		2.95311	0.208199	0.00858858
2.97636	0.68888	0.612162		2.94709	0.207134	0.00821785
2.97317	0.650995	0.685761		2.94101	0.0514641	0.00561478
2.97035	0.673834	0.769761		2.93485	0.240568	0.00702631
2.9673	0.59696	0.857106		2.92868	0.230843	0.00746764
2.96435	0.475913	0.935242		2.92274	0.364224	0.00655272
2.96115	0.425116	0.974262		2.91696	0.0946939	0.00763614
2.95819	0.386242	1.00683		2.91073	0.198545	0.0097364
2.95531	0.397952	1.03215		2.90464	0.127844	0.0101438
2.95204	0.367718	1.08048		2.89873	0.298847	0.00968143
2.94912	0.380793	1.14885		2.89276	0.0279681	0.0105896
2.94595	0.37973	1.21004		2.88647	0.186619	0.00847699
2.94317	0.339143	1.28784		2.881	0.0816327	0.00900843
2.94028	0.334833	1.35152		2.87465	0.213452	0.00889876
2.93708	0.330032	1.39031		2.86839	-0.161633	0.00749259
2.93403	0.336676	1.4332		2.86274	0.226513	0.00613912
2.93106	0.318847	1.47387		2.85703	0.0693523	0.0070385
2.92809	0.311229	1.50307		2.85106	0.179805	0.00436775
2.92499	0.284988	1.5427		2.84469	-0.117551	0.0030161
2.92204	0.302493	1.59258		2.83847	-0.0739663	0.00593033
2.91893	0.301693	1.63155		2.83258	-0.0135581	0.00420777
2.91599	0.285875	1.6723		2.82668	0.080355	0.00449455
2.91349	0.250057	1.72228		2.82061	0.11173	0.0065371
2.90987	0.256831	1.76493		2.81462	-0.0296007	0.00661644
2.90705	0.267191	1.8185		2.80857	-0.25441	0.00233369
2.90388	0.233803	1.85267		2.80253	-0.104987	0.00237145
2.90106	0.224972	1.88535		2.79663	0.0748891	0.00143529
2.89757	0.211562	1.9062		2.7903	0.0267613	0.000612611
2.89496	0.184753	1.92276		2.78454	-0.0198758	0.00147034
2.89196	0.184331	1.94871		2.77865	0.0589885	0.000555751
2.88906	0.192459	1.97485		2.77239	0.0296007	0.00433007
2.88591	0.176184	2.00787		2.76648	0.0572139	0.00366936
2.88281	0.150629	2.04243		2.76069	0.0771606	0.00235703
2.88011	0.142308	2.06547		2.75384	-0.0352795	0.000907755
2.87694	0.138404	2.09552		2.74819	0.0725466	0.00323117
2.87408	0.154309	2.12709		2.74248	0.00724046	0.00428353
2.87089	0.169644	2.151		2.73644	0.116557	0.00678969
2.86805	0.154588	2.14756		2.73061	-0.104064	0.00771149
2.86509	0.142487	2.1702		2.72466	0.0220053	0.00962283
2.86207	0.139729	2.16443		2.71853	0.0785803	0.0113336
2.85905	0.151148	2.16225		2.71252	-0.139982	0.00723706
2.85605	0.171896	2.17714		2.70676	0.033221	0.00491341
2.85304	0.173794	2.18037		2.70044	-0.0276131	0.00555732
2.85001	0.199004	2.19271		2.69453	-0.00113576	0.0028955
2.84712	0.191936	2.1941		2.68794	-0.066016	0.00135028
2.84394	0.189834	2.21833		2.68215	-0.0341438	0.00375482
2.84094	0.181911	2.24053		2.67635	-0.132032	0.00587708
2.8379	0.189285	2.25541		2.67016	-0.0215084	0.00539184
2.83397	0.171875	2.286		2.66423	-0.137782	0.00523933
2.83198	0.159648	2.31032		2.65882	-0.247596	0.00351858
2.82894	0.16583	2.32745		2.65221	0.00866016	0.00390942
2.82612	0.147012	2.34621		2.6457	-0.209548	0.00257753
2.82294	0.140967	2.36619		2.64014	-0.140763	0.000901131
2.82006	0.126152	2.38212		2.63401	-0.151979	0.00421699
2.81701	0.104894	2.39906		2.62797	-0.000212955	0.00792894
2.81381	0.133059	2.39945		2.6223	-0.260231	0.00589704
2.81094	0.119257	2.40768		2.61623	0.0354925	0.00723269
2.80792	0.10357	2.40726		2.60977	-0.286069	0.00784659
2.80483	0.117355	2.40902		2.60419	-0.134304	0.00471674
2.80182	0.0934087	2.42847		2.59823	-0.312405	0.00148744
2.79903	0.080633	2.43748		2.59203	-0.120674	0.00257704
2.79588	0.0850562	2.45489		2.58611	-0.367347	0.000639367
2.79269	0.0755047	2.46512		2.58008	-0.205572	0.000959522
2.78989	0.0539649	2.48141		2.57419	-0.133594	0.0020202
2.7869	0.0908525	2.51096		2.56825	-0.253061	0.00194874
2.78396	0.0631091	2.54491		2.56185	-0.132316	0.000730393
2.78088	0.0785853	2.57424		2.55651	-0.152831	0.00280383
2.77779	0.0736898	2.6115		2.55003	-0.287489	0.0039072
2.77492	0.038876	2.64395		2.54396	-0.326176	0.00411941
2.77192	0.0194664	2.67641		2.53821	-0.14992	0.0075829
2.76888	0.022901	2.71292		2.5319	-0.150843	0.0061385
2.7662	0.0344827	2.74948		2.5259	-0.342644	0.00452371
2.76307	0.0261301	2.78836		2.51988	-0.378137	0.00452484
2.76023	0.003966	2.82801		2.51386	-0.286495	0.00420671
2.75699	-0.00737791	2.86601		2.50772	-0.396451	-0.000618371
2.7538	-0.00620449	2.89919		2.50202	-0.246034	9.02e-05
2.75083	-0.0205979	2.9394		2.49597	-0.359326	0.00103369
2.74768	-0.0167546	2.97938		2.48994	-0.216717	0.00177666
2.74478	-0.0151484	3.01991		2.48388	-0.274215	0.000963852
2.74186	-0.0274457	3.06263		2.47839	-0.328802	0.00560821
2.73883	-0.0201115	3.10343		2.47228	-0.31567	0.00570743
2.73596	0.00714735	3.13975		2.46598	-0.558865	0.00516264
2.73275	-0.0178577	3.18529		2.46	-0.251855	0.00332524
2.72971	-0.0487423	3.225		2.45387	-0.259308	0.00331296
2.72664	-0.0800207	3.25737		2.44803	-0.468927	-0.000538335
2.72383	-0.106092	3.28949		2.44181	-0.28465	0.00435766
2.72075	-0.122751	3.33436		2.43568	-0.276486	0.00403654
2.71779	-0.119707	3.37545		2.42981	-0.436415	0.00366248
2.71487	-0.138148	3.43378		2.4235	-0.457569	0.00340763
2.71179	-0.124823	3.49439		2.41761	-0.529193	0.00379819
2.70879	-0.116697	3.52658		2.41174	-0.436415	-1.35e-05
2.70531	-0.131862	3.56566		2.40549	-0.241775	-0.00434097
2.7028	-0.122265	3.60922		2.39963	-0.445289	-0.00598654
2.6997	-0.146368	3.66204		2.39365	-0.263638	-0.00672686
2.69675	-0.126229	3.70614		2.38741	-0.643905	-0.0063085
2.69382	-0.159234	3.73158		2.38165	-0.260799	-0.00735678
2.6907	-0.134478	3.77273		2.37557	-0.511021	-0.00330197
2.68814	-0.145467	3.81264		2.3696	-0.4252	-0.000153967
2.6848	-0.123155	3.85199		2.36364	-0.718723	0.00351463
2.68192	-0.108286	3.89166		2.35748	-0.419805	0.00196421
2.6784	-0.101189	3.92083		2.35169	-0.450471	0.00318556
2.6758	-0.110009	3.94812		2.34562	-0.636309	0.00320825
2.67277	-0.11407	3.98373		2.33968	-0.569938	0.00161969
2.66963	-0.0971597	4.0189		2.33328	-0.774517	-0.0055009
2.66672	-0.0981657	4.05601		2.32757	-0.439184	-0.00629263
2.66388	-0.113712	4.09253		2.32125	-0.819876	-0.00638206
2.66094	-0.0988305	4.12348		2.31537	-0.5304	-0.00654186
2.65762	-0.105695	4.15635		2.30949	-0.50662	-0.00685275
2.65484	-0.0975993	4.18821		2.30369	-0.676842	0.00138831
2.65178	-0.0772638	4.22434		2.29747	-0.497817	0.00440139
2.64885	-0.0838523	4.24658		2.29146	-0.483904	0.00395909
2.64543	-0.0887943	4.27718		2.28535	-0.786229	0.00601884
2.64257	-0.0784893	4.29347		2.27931	-0.929903	0.00477907
2.6397	-0.101558	4.30454		2.27322	-0.760888	0.000750121
2.63688	-0.0898429	4.31335		2.26756	-0.635102	-0.00130628
2.63395	-0.0932495	4.3305		2.26135	-0.759752	-0.00278747
2.63051	-0.0689195	4.35044		2.25576	-0.620976	-0.004706
2.62766	-0.0692958	4.36545		2.24938	-0.635954	-0.00780551
2.62475	-0.0531983	4.37559		2.24364	-0.870417	-0.00971764
2.6216	-0.048137	4.39321		2.23738	-0.749388	-0.00819291
2.61851	-0.0442613	4.40524		2.23144	-1.01459	-0.00663258
2.61577	-0.0537282	4.42246		2.22533	-0.708359	-0.00480618
2.6127	-0.07277	4.43319		2.21942	-0.605715	0.000280133
2.60972	-0.0564566	4.44425		2.21347	-0.654694	-0.000643129
2.60654	-0.0609869	4.45649		2.20755	-0.652565	-0.00130151
2.60362	-0.0619852	4.46832		2.20106	-0.777569	-0.00285593
2.60058	-0.0506321	4.47928		2.19521	-0.707365	-0.00498452
2.59719	-0.0542839	4.49212		2.18926	-0.765715	-0.00496266
2.59481	-0.0694821	4.50621		2.18319	-0.761881	-0.00313784
2.59196	-0.0782556	4.51721		2.17677	-0.89725	-0.0049367
2.58861	-0.103079	4.52864		2.17107	-1.19603	-0.00707647
2.58556	-0.110818	4.54393		2.1653	-0.817818	-0.00654385
2.5839	-0.0872984	4.55165		2.15914	-0.911376	-0.0111285
2.57964	-0.0869764	4.56333		2.15319	-0.818173	-0.011434
2.57656	-0.0853019	4.58576		2.14727	-1.00692	-0.0098597
2.57356	-0.0683338	4.60333		2.14121	-0.867436	-0.00829624
2.57051	-0.0929988	4.61973		2.13517	-0.881704	-0.0111456
2.56763	-0.0891009	4.63224		2.13037	-0.890932	-0.0074183
2.56463	-0.0969808	4.65094		2.1232	-1.13505	-0.00562058
2.56161	-0.100422	4.67808		2.11718	-1.10552	-0.00530686
2.55861	-0.0879857	4.70543		2.11107	-0.839397	-0.00656283
2.55555	-0.0922956	4.73155		2.10461	-1.04738	-0.00317583
2.55262	-0.0784932	4.75829		2.09896	-1.04156	-0.00616612
2.54932	-0.0798194	4.77317		2.09317	-1.17814	-0.00864837
2.54655	-0.0532062	4.80225		2.087	-1.2575	-0.00939903
2.54359	-0.0887828	4.82215		2.08134	-1.27624	-0.00746042
2.54014	-0.109895	4.84057		2.0749	-1.07627	-0.0120079
2.53754	-0.131576	4.85062		2.06862	-1.08408	-0.00679163
2.53451	-0.152172	4.86756		2.0626	-1.3776	-0.00439725
2.53145	-0.167104	4.88835		2.05621	-1.1381	-0.0041877
2.52855	-0.153625	4.90713		2.05087	-1.3277	-0.00433887
2.52569	-0.141386	4.92123		2.04508	-1.18666	-0.000668053
2.52254	-0.142437	4.92797		2.03894	-1.38371	-0.00531788
2.51934	-0.1538	4.94344		2.03305	-1.06946	-0.00621285
2.51654	-0.151824	4.95376		2.02681	-1.37505	-0.00556503
2.51265	-0.155444	4.97777		2.02094	-1.4219	-0.00478699
2.51067	-0.175839	4.99838		2.01484	-1.42942	-0.0048017
2.50773	-0.17195	5.01057		2.00903	-1.26403	-0.00278454
2.50455	-0.191204	5.01831		2.00294	-1.35709	-0.00203901
2.50145	-0.202844	5.04144		1.99705	-1.45697	-0.00304187
2.49842	-0.211418	5.06196		1.99094	-1.26524	-0.0030366
2.49545	-0.228728	5.07933		1.98488	-1.62328	-0.00485675
2.49245	-0.254933	5.09641		1.97878	-1.4904	-0.0061545
2.4895	-0.260526	5.11321		1.97308	-1.36241	-0.00701543
2.48701	-0.295633	5.12529		1.96691	-1.20887	-0.00899687
2.48355	-0.327961	5.12839		1.96146	-1.52327	-0.0094757
2.48048	-0.328679	5.13502		1.95461	-1.40735	-0.00375699
2.47754	-0.34174	5.15067		1.94861	-1.66183	-0.00369649
2.47444	-0.368255	5.14791		1.94251	-1.44753	-0.00474961
2.47148	-0.394715	5.16171		1.9367	-1.65139	-0.00346945
2.46856	-0.387134	5.16276		1.93066	-1.37839	-0.00429614
2.46545	-0.362106	5.16824		1.92434	-1.52341	-0.00953935
2.46272	-0.373724	5.18016		1.9185	-1.79997	-0.00895267
2.45941	-0.374151	5.19322		1.91244	-1.65352	-0.0103769
2.45645	-0.384014	5.20094		1.90663	-1.63933	-0.0086142
2.4534	-0.429016	5.19948		1.90053	-1.53484	-0.00942373
2.45045	-0.44665	5.19419		1.89461	-1.61178	-0.0104867
2.44761	-0.43709	5.16804		1.88843	-1.69839	-0.00963131
2.4448	-0.455766	5.15422		1.88266	-1.65345	-0.00624217
2.44136	-0.456108	5.14697		1.87654	-1.97281	-0.0113107
2.43847	-0.469015	5.12722		1.8704	-1.84142	-0.0109049
2.43559	-0.482513	5.12853		1.86466	-1.61448	-0.0106604
2.43237	-0.483882	5.10905		1.85858	-1.84873	-0.00795871
2.4293	-0.519706	5.08886		1.85266	-1.83787	-0.00566119
2.4265	-0.509997	5.07198		1.84658	-1.68376	-0.000805685
2.42347	-0.505716	5.05202		1.84065	-1.63997	-0.00180572
2.42029	-0.523079	5.0456		1.83439	-2.3058	-0.00369042
2.41767	-0.522329	5.03128		1.82859	-1.96614	-0.00508504
2.41437	-0.540984	5.00829		1.82257	-2.04167	-0.00701978
2.41135	-0.546729	4.98716		1.81622	-2.39659	-0.00516221
2.40836	-0.566772	4.97804		1.81039	-2.19493	-0.00492335
2.40532	-0.602145	4.95627		1.80446	-1.98048	-2.82e-05
2.40281	-0.612205	4.94937		1.79849	-1.89842	-0.0011235
2.39919	-0.615042	4.9306		1.79236	-1.9139	-0.00100702
2.3963	-0.617413	4.92149		1.78648	-1.92561	-0.000964696
2.39347	-0.609433	4.8913		1.78033	-1.9129	0.00246614
2.39038	-0.6096	4.87291		1.77408	-2.33704	0.0028714
2.3874	-0.615321	4.84873		1.76814	-2.34932	0.00254911
2.3844	-0.623104	4.83118		1.76204	-2.25143	0.0022857
2.38124	-0.624666	4.81861		1.75626	-2.1627	0.000206705
2.37831	-0.665334	4.8104		1.75049	-2.52643	-0.0037393
2.37519	-0.666179	4.81871		1.74431	-2.33647	-0.00595985
2.37214	-0.651883	4.81501		1.73845	-2.53409	-0.00357351
2.36928	-0.667867	4.81006		1.73236	-2.56639	-0.00170889
2.3666	-0.70072	4.81583		1.72623	-2.66506	-0.00254193
2.36316	-0.711096	4.81367		1.72038	-2.70815	0.00253717
2.36045	-0.731783	4.81426		1.7138	-2.89789	0.00446406
2.35716	-0.729731	4.82766		1.70826	-2.572	0.00480072
2.35444	-0.736179	4.83684		1.70198	-2.9869	0.0037383
2.35133	-0.721737	4.84117		1.69643	-3.02339	0.00587845
2.34793	-0.701753	4.84517		1.69002	-3.28738	0.0039964
2.34511	-0.694573	4.85064		1.68404	-3.10034	0.00475975
2.34213	-0.685587	4.85561		1.67801	-3.22882	0.00343018
2.33917	-0.680678	4.8571		1.67277	-3.18048	-0.000115369
2.3362	-0.696735	4.86307		1.66597	-3.62818	1.21e-05
2.33324	-0.699934	4.87599		1.66009	-3.80742	-0.00243069
2.33031	-0.702851	4.88101		1.65401	-4.04146	-0.00659351
2.32717	-0.691434	4.87439		1.64793	-4.15226	-0.00736448
2.3242	-0.681116	4.84896		1.64206	-4.26343	-0.00462252
2.32123	-0.68187	4.83283		1.63574	-4.51251	-0.00164622
2.31835	-0.730537	4.82561		1.63021	-4.71006	0.000197852
2.31517	-0.725655	4.80307		1.6239	-5.63301	-0.000538705
2.31221	-0.758237	4.78696		1.61776	-5.80068	-0.00089185
2.30926	-0.76662	4.77227		1.61214	-5.97622	-0.00509917
2.3061	-0.737942	4.77874		1.60568	-6.40625	-0.0101958
2.30325	-0.742102	4.76842		1.60001	-6.77495	-0.00829746
2.3001	-0.766819	4.78796		1.5942	-7.34325	-0.00387846
2.2971	-0.747971	4.80199		1.58797	-7.9682	-0.00313277
2.29419	-0.757099	4.80285		1.58185	-8.84494	-6.9e-05
2.29137	-0.721537	4.80417		1.57613	-9.34119	0.00308897
2.28776	-0.719919	4.78774		1.56984	-10.4529	0.00352845
2.28521	-0.706835	4.80118		1.56387	-12.0205	0.00464134
2.28242	-0.708297	4.81088		1.55828	-13.7212	0.00620421
2.27904	-0.739484	4.81731		1.55122	-20.3466	0.00806017
2.27616	-0.76137	4.82186		1.54577	-32.0495	0.00527473
2.2734	-0.759498	4.8139		1.53995	-43.7264	0.00464338
2.27019	-0.760921	4.82328		1.53344	-55.4853	0.00381429
2.26722	-0.73584	4.8372		1.52786	-67.2347	0.00635009
2.2641	-0.718625	4.85655		1.52208	-77.867	0.0067462
2.26115	-0.734448	4.85851		1.51583	-89.0185	0.00570488
2.25785	-0.696887	4.87661		1.50989	-99.3505	0.00801829
2.25504	-0.732281	4.88883		1.50391	-108.947	0.0101052
2.2521	-0.760194	4.89865		1.4977	-117.519	0.0112004
2.2492	-0.772235	4.90152		1.49176	-126.012	0.0117293
2.24621	-0.775669	4.92402		1.48573	-133.368	0.0144316
2.24331	-0.780797	4.94439		1.48008	-140.194	0.0115766
2.24008	-0.785279	4.96708		1.47369	-146.732	0.00412232
2.23725	-0.819261	4.98498		1.46735	-151.956	-0.00174503
2.23447	-0.826883	5.00667		1.46171	-156.145	-0.00638235
2.23124	-0.799777	5.02117		1.45532	-160.295	-0.00897169
2.22805	-0.823581	5.02281		1.44951	-162.628	-0.0132807
2.2257	-0.82298	5.03398		1.44337	-163.817	-0.0155544
2.22218	-0.806697	5.0359		1.43792	-163.623	-0.024862
2.21943	-0.798555	5.0379		1.43223	-161.689	-0.0276033
2.21631	-0.807322	5.0515		1.42545	-155.764	-0.0341635
2.21313	-0.805681	5.04846		1.41954	-144.024	-0.0381229
2.21026	-0.801778	5.04969		1.41342	-124.219	-0.0358821
2.20686	-0.822399	5.03214		1.40794	-95.4688	-0.0363862
2.20411	-0.841357	5.02943		1.40148	-66.4057	-0.0409182
2.20127	-0.868093	5.03623		1.39518	-48.1585	-0.0394134
2.19808	-0.860531	5.03807		1.38959	-39.0648	-0.0443892
2.19524	-0.876363	5.02058		1.38387	-34.3327	-0.0465046
2.1924	-0.855536	5.01844		1.37765	-31.6801	-0.0434758
2.18905	-0.849471	5.0282		1.37163	-29.5133	-0.0409096
2.18534	-0.854694	5.01706		1.36545	-28.0752	-0.0424387
2.1831	-0.839882	5.00969		1.35953	-26.2227	-0.0367726
2.18003	-0.85747	5.01304		1.35349	-25.1764	-0.0397
2.17691	-0.892548	5.03889		1.34746	-23.9081	-0.0387217
2.17399	-0.90827	5.04828		1.34113	-23.2312	-0.0369771
2.17072	-0.907708	5.05221		1.33526	-23.0581	-0.0341258
2.16782	-0.904182	5.08468		1.32915	-22.2212	-0.0353114
2.16506	-0.885166	5.10813		1.32358	-21.7138	-0.0354566
2.16208	-0.89426	5.11423		1.31755	-21.3872	-0.0395716
2.15893	-0.894378	5.10768		1.3113	-21.2205	-0.0400565
2.15594	-0.907268	5.11047		1.30526	-20.9441	-0.0442729
2.15302	-0.904973	5.11374		1.2992	-20.5931	-0.0472454
2.15001	-0.9312	5.10607		1.29321	-20.2557	-0.0490004
2.14706	-0.946231	5.10957		1.28735	-19.9288	-0.0463155
2.14424	-0.981242	5.11798		1.28144	-19.657	-0.046443
2.14123	-0.989055	5.12991		1.27542	-19.3725	-0.0436348
2.13788	-1.0318	5.13806		1.26925	-18.8714	-0.0384751
2.1349	-1.03572	5.16169		1.26281	-18.9641	-0.0334863
2.13207	-1.05658	5.18684		1.25721	-18.6544	-0.0335784
2.12934	-1.0324	5.20898		1.25129	-18.5154	-0.0343984
2.126	-1.03958	5.22281		1.24533	-18.0953	-0.0344364
2.12286	-1.04825	5.223		1.23924	-17.3475	-0.0344643
2.12003	-1.07031	5.22114		1.23311	-17.1891	-0.0383195
2.11681	-1.1225	5.21921		1.22734	-17.1813	-0.0347168
2.11388	-1.12202	5.20711		1.22161	-17.3574	-0.0322516
2.11086	-1.14961	5.20966		1.21484	-16.5849	-0.0327471
2.10811	-1.13817	5.19508		1.20947	-16.4361	-0.0354682
2.10496	-1.10574	5.18802		1.20282	-16.4981	-0.0315708
2.10199	-1.10876	5.19718		1.19703	-16.3235	-0.0366052
2.09888	-1.11712	5.21122		1.19096	-16.051	-0.0385337
2.0961	-1.12734	5.21199		1.18499	-15.7457	-0.0397933
2.09296	-1.13332	5.22405		1.17886	-15.4007	-0.0391657
2.09011	-1.1081	5.2241		1.17292	-15.0995	-0.0402591
2.0868	-1.13037	5.22084		1.16723	-15.182	-0.0397136
2.08386	-1.18347	5.22588		1.1609	-15.902	-0.0381836
2.08098	-1.18927	5.23029		1.15482	-15.1579	-0.0341725
2.07796	-1.21359	5.22571		1.14886	-14.7035	-0.0307213
2.0751	-1.24643	5.22924		1.14324	-14.4749	-0.031177
2.07194	-1.24581	5.22345		1.13704	-14.6318	-0.0338426
2.069	-1.25002	5.21255		1.13101	-14.6306	-0.0385873
2.06591	-1.25297	5.21599		1.12503	-14.5173	-0.0366782
2.06283	-1.27362	5.20062		1.11904	-14.7211	-0.0383337
2.05985	-1.26836	5.19706		1.11307	-14.8739	-0.036617
2.05676	-1.27391	5.18702		1.10686	-14.606	-0.0332733
2.05405	-1.28378	5.17687		1.10104	-14.7532	-0.0292865
2.05082	-1.32607	5.16581		1.09498	-14.7368	-0.0316894
2.04781	-1.34191	5.18042		1.08875	-14.8931	-0.0279683
2.04481	-1.35358	5.18321		1.08264	-15.0697	-0.0271256
2.04173	-1.3678	5.17564		1.07674	-14.7138	-0.0200895
2.03881	-1.37452	5.18202		1.07121	-14.942	-0.0187018
2.03586	-1.42499	5.18381		1.06495	-15.013	-0.0165243
2.0331	-1.4585	5.19263		1.05874	-14.8876	-0.0214934
2.02969	-1.42452	5.18178		1.05279	-15.2077	-0.0193773
2.02684	-1.44473	5.19372		1.04664	-15.0967	-0.0239088
2.02386	-1.4375	5.19461		1.04067	-15.2912	-0.0228043
2.02072	-1.44594	5.18385		1.03501	-15.2798	-0.0235997
2.01782	-1.45145	5.17823		1.02895	-15.1774	-0.0192925
2.01482	-1.45373	5.17748		1.02291	-15.0812	-0.0213049
2.01175	-1.46886	5.18028		1.01711	-14.914	-0.0200141
2.00885	-1.47762	5.20203		1.01063	-15.7105	-0.019355
2.00569	-1.48545	5.20818		1.00458	-14.7589	-0.0158614
2.00272	-1.47569	5.21101		0.998723	-14.7144	-0.0149072
1.99998	-1.4835	5.21236		0.992577	-14.8383	-0.0158701
1.99666	-1.47844	5.22172		0.986801	-14.5399	-0.0152937
1.99378	-1.48882	5.25541		0.980812	-14.5364	-0.018584
1.99065	-1.4762	5.25668		0.974128	-14.7572	-0.0225296
1.98786	-1.47548	5.25145		0.968467	-14.7003	-0.0232231
1.98488	-1.48069	5.24165		0.962786	-14.6245	-0.0191844
1.98055	-1.51402	5.24541		0.956583	-14.7883	-0.0135989
1.97865	-1.53678	5.24647		0.950511	-15.5496	-0.00987171
1.97564	-1.53788	5.2573		0.944622	-15.1953	-0.0101978
1.97283	-1.53693	5.26649		0.938698	-15.0506	-0.00514624
1.96969	-1.55999	5.27566		0.932619	-15.3854	-0.0074373
1.96682	-1.57437	5.28712		0.926438	-15.7362	-0.010601
1.96371	-1.58451	5.28684		0.920477	-15.9073	-0.00646953
1.96057	-1.5885	5.28343		0.91455	-15.7726	-0.00318202
1.95792	-1.62499	5.28792		0.908691	-16.0893	-0.00760582
1.95463	-1.6335	5.28717		0.90235	-16.7557	-0.00932356
1.95199	-1.63806	5.27097		0.896523	-16.6157	-0.00769197
1.94869	-1.63809	5.26829		0.890531	-16.6215	-0.00996853
1.94573	-1.64553	5.24695		0.884513	-16.9528	-0.011006
1.94264	-1.63894	5.24207		0.878799	-17.3728	-0.00880778
1.93976	-1.64943	5.23375		0.871644	-17.6056	-0.00317643
1.93658	-1.61959	5.22385		0.866626	-17.5688	-0.00306831
1.93369	-1.62909	5.20306		0.860352	-18.2453	-0.00106549
1.93067	-1.65067	5.19299		0.854429	-18.2301	-5.91e-05
1.92783	-1.63038	5.17858		0.848131	-18.8232	0.00407504
1.92476	-1.64787	5.17875		0.842092	-19.0972	0.00270701
1.92165	-1.65892	5.18249		0.836072	-19.6393	0.00603164
1.91878	-1.68867	5.18718		0.830081	-20.0436	0.0072396
1.91568	-1.71314	5.1932		0.824181	-20.3351	0.0128164
1.91264	-1.70887	5.19559		0.818113	-21.1352	0.0126012
1.90967	-1.73719	5.20155		0.812638	-22.5805	0.0191275
1.90664	-1.74948	5.21015		0.80628	-22.5995	0.0226818
1.90365	-1.72525	5.21804		0.800179	-23.3718	0.0305898
1.90082	-1.74979	5.22081		0.794265	-23.8652	0.0391916
1.89764	-1.76626	5.21529		0.78817	-24.3633	0.0475998
1.89473	-1.77448	5.22134		0.782303	-25.1413	0.0581941
1.8917	-1.80776	5.22108		0.776071	-25.4418	0.0678405
1.88831	-1.80096	5.21921		0.770036	-26.0442	0.0803967
1.88569	-1.79216	5.22465		0.764323	-26.9165	0.0892049
1.88277	-1.81794	5.23962		0.758268	-28.3658	0.100965
1.87981	-1.84085	5.24151		0.752223	-28.7853	0.110202
1.87668	-1.84775	5.24992		0.746218	-29.1031	0.12082
1.8737	-1.88029	5.24879		0.739821	-29.1645	0.129745
1.87071	-1.89889	5.23889		0.734284	-29.721	0.135738
1.86766	-1.90946	5.2364		0.728281	-29.6802	0.144
1.86463	-1.91106	5.25446		0.722048	-30.7576	0.157109
1.86171	-1.91669	5.24431		0.716054	-30.8966	0.163543
1.85872	-1.93953	5.24663		0.710013	-31.2458	0.171858
1.85566	-1.95836	5.25298		0.70414	-31.7692	0.185534
1.85265	-1.98166	5.24584		0.698077	-32.2289	0.197003
1.84971	-2.01022	5.23992		0.691413	-32.8408	0.203591
1.84658	-2.05494	5.2089		0.685661	-34.9509	0.221419
1.84357	-2.04955	5.20615		0.67993	-34.4239	0.234808
1.84064	-2.06249	5.18626		0.673962	-34.3119	0.249867
1.83766	-2.05547	5.19216		0.668059	-34.3699	0.261533
1.83463	-2.04106	5.18347		0.662064	-34.3142	0.274991
1.83163	-2.04867	5.18931		0.655735	-34.4766	0.285007
1.82855	-2.11469	5.19311		0.649929	-35.2384	0.298509
1.82565	-2.15938	5.187		0.643987	-37.1187	0.306003
1.82245	-2.15132	5.17582		0.638008	-35.9781	0.320399
1.81955	-2.16867	5.18476		0.631958	-36.6194	0.331791
1.81643	-2.21265	5.18598		0.625817	-36.0826	0.340596
1.81389	-2.21646	5.20659		0.620316	-36.1798	0.345271
1.8106	-2.26516	5.23068		0.614116	-35.9268	0.360488
1.8075	-2.27567	5.23724		0.607779	-36.6965	0.370565
1.80456	-2.2837	5.23679		0.601625	-35.8894	0.383648
1.80145	-2.31396	5.23972		0.595778	-36.2747	0.392717
1.7985	-2.34193	5.22897		0.589485	-37.18	0.398967
1.79556	-2.4073	5.23267		0.58377	-36.8708	0.407533
1.79246	-2.43583	5.23403		0.577708	-36.9166	0.42139
1.78967	-2.48569	5.23228		0.571605	-36.6846	0.42472
1.78652	-2.50777	5.24868		0.565592	-36.9643	0.429706
1.78347	-2.56613	5.26134		0.559764	-36.8638	0.443873
1.78044	-2.6318	5.26907		0.553631	-36.9832	0.445282
1.77732	-2.6638	5.26398		0.54761	-37.3232	0.451019
1.7748	-2.69076	5.25812		0.541643	-38.7619	0.457015
1.77143	-2.73375	5.25349		0.535622	-38.177	0.468967
1.76872	-2.77247	5.25436		0.529647	-38.3054	0.484972
1.76541	-2.83363	5.25437		0.523414	-38.4085	0.499152
1.76287	-2.84692	5.25052		0.518109	-39.2706	0.504046
1.75935	-2.87891	5.24548		0.51175	-39.6636	0.520643
1.75661	-2.93112	5.24238		0.505881	-40.1678	0.530149
1.75346	-2.95799	5.23015		0.499642	-40.6375	0.529998
1.75035	-3.02191	5.22793		0.493476	-41.0013	0.539295
1.74755	-3.05561	5.21239		0.487631	-41.4775	0.548744
1.74445	-3.0914	5.20864		0.481657	-41.3166	0.559644
1.74151	-3.13723	5.20654		0.475292	-42.7422	0.57061
1.7384	-3.18383	5.19375		0.469342	-42.7047	0.58663
1.73542	-3.24617	5.17874		0.463466	-42.9097	0.601789
1.73249	-3.28546	5.16097		0.457866	-43.2385	0.61413
1.72947	-3.37381	5.14915		0.452242	-43.4962	0.629017
1.72656	-3.41688	5.14826		0.445538	-43.6302	0.644453
1.72344	-3.48135	5.14006		0.439379	-44.1282	0.65205
1.72041	-3.53783	5.1443		0.433228	-44.4676	0.660436
1.71738	-3.61939	5.12236		0.42731	-44.4358	0.681953
1.71371	-3.70792	5.12071		0.421356	-44.4342	0.69021
1.71144	-3.76346	5.10262		0.415253	-44.7931	0.700806
1.7085	-3.86064	5.083		0.409578	-44.7089	0.71653
1.70559	-3.93069	5.07123		0.403256	-44.7208	0.728029
1.70243	-3.99759	5.05568		0.397329	-45.5243	0.73624
1.69929	-4.05962	5.03844		0.391286	-45.357	0.740795
1.69684	-4.18104	5.01874		0.385464	-45.4918	0.759069
1.69334	-4.2625	5.00278		0.379338	-45.3835	0.775859
1.69052	-4.38266	4.96876		0.373425	-45.8544	0.797959
1.68731	-4.50938	4.94416		0.367542	-45.4884	0.809857
1.68444	-4.60069	4.90323		0.361467	-45.5621	0.835425
1.68151	-4.67937	4.86104		0.355107	-46.2053	0.838033
1.67846	-4.78585	4.82583
1.67536	-4.92136	4.79436
1.6725	-5.05973	4.74157
1.66941	-5.17282	4.70051
1.66632	-5.34681	4.64504
1.66331	-5.47257	4.57969
1.66042	-5.64953	4.52056
1.65723	-5.84536	4.47496
1.6543	-6.06157	4.41924
1.65144	-6.28086	4.38985
1.64844	-6.46132	4.32659
1.64544	-6.68991	4.26722
1.64221	-6.90036	4.20038
1.63931	-7.15757	4.1251
1.63642	-7.39629	4.05564
1.63355	-7.66429	3.98615
1.63025	-8.01201	3.92699
1.62726	-8.37885	3.85562
1.62427	-8.82041	3.78281
1.62095	-9.37409	3.70245
1.61826	-10.107	3.63021
1.61534	-11.0364	3.55423
1.61229	-12.1153	3.47946
1.60932	-13.3636	3.40165
1.60651	-14.7822	3.32481
1.60331	-16.3708	3.25359
1.60002	-18.1459	3.18691
1.59733	-20.0617	3.11328
1.59425	-22.1831	3.04226
1.59122	-24.4558	2.98151
1.58838	-26.8917	2.93112
1.58529	-29.5418	2.89079
1.58234	-32.2899	2.84618
1.57916	-35.2449	2.80458
1.57626	-38.3293	2.77397
1.57324	-41.5793	2.74017
1.5703	-44.9652	2.71926
1.56713	-48.4568	2.70203
1.56432	-52.0953	2.67936
1.56125	-55.8786	2.68365
1.55815	-59.7682	2.68831
1.55523	-63.7736	2.70132
1.55187	-67.874	2.70825
1.54934	-72.0604	2.72312
1.54614	-76.3356	2.75543
1.54314	-80.6873	2.79077
1.54025	-85.103	2.83858
1.53736	-89.6121	2.89942
1.53416	-94.1638	2.96278
1.53143	-98.7399	3.04014
1.5281	-103.328	3.12592
1.52508	-107.937	3.22972
1.5223	-112.546	3.33312
1.5193	-117.113	3.4559
1.51635	-121.704	3.59046
1.5132	-126.209	3.72864
1.51013	-130.683	3.87682
1.5072	-135.111	4.04412
1.50424	-139.482	4.20389
1.50144	-143.851	4.39318
1.49807	-148.121	4.5917
1.49536	-152.359	4.80689
1.4921	-156.467	5.04165
1.48907	-160.495	5.27919
1.4861	-164.313	5.54492
1.48319	-167.861	5.80529
1.48025	-171.098	6.08492
1.47712	-173.813	6.38494
1.4743	-175.953	6.69059
1.47119	-177.469	6.99969
1.46817	-178.521	7.32065
1.46506	-179.187	7.6321
1.46211	-179.503	7.95289
1.45929	-179.475	8.28255
1.4563	-179.203	8.60296
1.45309	-178.664	8.91323
1.45006	-177.837	9.22615
1.4471	-176.788	9.54608
1.444	-175.52	9.85824
1.44098	-174.022	10.1606
1.43791	-172.279	10.4526
1.43508	-170.395	10.7474
1.43207	-168.271	11.0255
1.4284	-165.986	11.2974
1.42601	-163.497	11.5876
1.4228	-160.82	11.8548
1.42023	-157.993	12.1291
1.41683	-154.995	12.4083
1.41407	-151.824	12.6679
1.41098	-148.532	12.9228
1.40807	-145.132	13.1722
1.40506	-141.572	13.4357
1.40196	-137.883	13.6837
1.39869	-134.1	13.9239
1.39583	-130.202	14.1617
1.39298	-126.249	14.3902
1.38988	-122.145	14.6031
1.38704	-117.984	14.8149
1.38396	-113.752	15.0207
1.38122	-109.476	15.2091
1.37807	-105.206	15.3889
1.37488	-100.87	15.5586
1.37196	-96.5538	15.7241
1.36897	-92.1942	15.8756
1.36595	-87.9399	16.018
1.36341	-83.6653	16.1464
1.3603	-79.4128	16.2633
1.35686	-75.1677	16.3824
1.35354	-70.9184	16.488
1.35079	-66.7381	16.5739
1.34789	-62.5793	16.6496
1.34539	-58.4878	16.7031
1.34178	-54.4609	16.7491
1.33942	-50.6266	16.7845
1.33592	-46.9841	16.8184
1.33284	-43.6737	16.8391
1.33006	-40.7376	16.8489
1.32696	-38.2653	16.8511
1.32398	-36.2523	16.8437
1.321	-34.516	16.8255
1.3172	-32.9875	16.8172
1.3149	-31.623	16.7985
1.31188	-30.4382	16.781
1.30884	-29.3188	16.7729
1.30564	-28.2855	16.775
1.30293	-27.3812	16.7639
1.30006	-26.4822	16.7442
1.29698	-25.6803	16.7275
1.29406	-24.9193	16.7083
1.29069	-24.1877	16.6892
1.28778	-23.4598	16.6712
1.28441	-22.7823	16.6575
1.28173	-22.1566	16.6552
1.27856	-21.5531	16.6264
1.27587	-20.9785	16.6116
1.27297	-20.4168	16.5867
1.27025	-19.9127	16.5596
1.26669	-19.4076	16.5425
1.26383	-18.9134	16.5242
1.26071	-18.4171	16.4948
1.25782	-17.9704	16.4576
1.25479	-17.5721	16.4292
1.25196	-17.2091	16.3968
1.24894	-16.8799	16.3635
1.24549	-16.493	16.3318
1.24286	-16.1542	16.2955
1.23975	-15.8254	16.2647
1.23674	-15.5398	16.2241
1.23362	-15.2595	16.1948
1.23075	-14.991	16.1605
1.22753	-14.7431	16.1254
1.22467	-14.5357	16.0894
1.22162	-14.3174	16.0568
1.21869	-14.0693	16.0179
1.21583	-13.8666	15.9909
1.21271	-13.6628	15.9465
1.21006	-13.4801	15.9084
1.20683	-13.3259	15.8628
1.20381	-13.1725	15.8157
1.20101	-13.0376	15.7721
1.1978	-12.9251	15.7372
1.19467	-12.8381	15.6938
1.1917	-12.7097	15.6408
1.18877	-12.5932	15.5866
1.18451	-12.4557	15.539
1.18267	-12.3617	15.4811
1.17988	-12.2639	15.4272
1.1766	-12.1684	15.3723
1.17383	-12.1119	15.3159
1.17066	-12.0651	15.2547
1.16764	-12.0097	15.1933
1.16486	-11.9672	15.122
1.16178	-11.8825	15.0454
1.15869	-11.8172	14.963
1.15583	-11.7549	14.8888
1.15255	-11.7082	14.8144
1.14988	-11.621	14.7338
1.14644	-11.553	14.6584
1.14372	-11.4987	14.5801
1.14071	-11.4389	14.5011
1.1377	-11.4011	14.4149
1.1348	-11.3447	14.3195
1.13168	-11.3236	14.2335
1.12861	-11.2898	14.1418
1.12577	-11.2713	14.0381
1.12242	-11.2523	13.954
1.1197	-11.2451	13.8639
1.11651	-11.2361	13.7785
1.11364	-11.2426	13.6953
1.10998	-11.2537	13.6058
1.10769	-11.2215	13.5059
1.10468	-11.1693	13.393
1.10136	-11.0925	13.2962
1.09845	-11.0719	13.1977
1.0955	-11.0924	13.103
1.09259	-11.0984	12.9993
1.08953	-11.1208	12.8934
1.08671	-11.1033	12.7891
1.08366	-11.0523	12.6862
1.08051	-11.0593	12.5852
1.07774	-11.031	12.4755
1.07456	-11.0287	12.3663
1.07149	-11.02	12.2611
1.06864	-11.0269	12.1518
1.06558	-11.023	12.0418
1.06242	-11.0342	11.907
1.05937	-11.039	11.7696
1.05589	-11.0469	11.6377
1.05339	-11.0344	11.501
1.05057	-11.0785	11.3529
1.04776	-11.0648	11.2174
1.04446	-11.0952	11.0733
1.04152	-11.1432	10.9251
1.03851	-11.1802	10.792
1.03581	-11.2042	10.647
1.03254	-11.2675	10.5063
1.02934	-11.2762	10.3743
1.0264	-11.258	10.2337
1.02329	-11.2739	10.0852
1.02047	-11.2976	9.92955
1.01753	-11.3092	9.78911
1.01447	-11.3701	9.64227
1.01147	-11.4096	9.4901
1.00851	-11.4508	9.33144
1.00538	-11.5027	9.17682
1.00256	-11.5734	9.0244
0.999506	-11.6312	8.85853
0.996602	-11.6854	8.69626
0.993319	-11.7561	8.52196
0.990452	-11.8226	8.35144
0.987513	-11.9076	8.17302
0.984519	-11.9561	7.9962
0.981484	-12.0272	7.83299
0.978524	-12.0998	7.66729
0.975604	-12.1552	7.48277
0.972338	-12.2134	7.2826
0.969419	-12.2905	7.08668
0.966493	-12.3746	6.89447
0.963185	-12.4563	6.69225
0.960408	-12.5641	6.50076
0.957393	-12.6579	6.31716
0.954572	-12.7841	6.10067
0.951467	-12.8633	5.89383
0.948495	-12.9707	5.68596
0.945314	-13.0912	5.46354
0.942619	-13.1588	5.25056
0.939424	-13.2493	5.02724
0.936612	-13.3617	4.79771
0.933475	-13.4533	4.57015
0.93035	-13.5893	4.33404
0.927494	-13.7049	4.10923
0.92431	-13.8341	3.87523
0.921334	-13.9397	3.63445
0.918335	-14.0811	3.38129
0.915522	-14.2024	3.16251
0.912402	-14.3236	2.94509
0.909419	-14.4688	2.71483
0.906409	-14.6072	2.49602
0.90335	-14.7299	2.25739
0.900336	-14.8856	2.02228
0.897309	-14.9925	1.79459
0.894337	-15.0975	1.55972
0.891358	-15.2002	1.30661
0.888577	-15.3143	1.05085
0.885498	-15.4173	0.789097
0.882137	-15.5741	0.521801
0.879368	-15.738	0.260467
0.876347	-15.863	-0.00137901
0.873353	-16.0006	-0.256387
0.870375	-16.1721	-0.534676
0.867486	-16.3394	-0.831426
0.864328	-16.4976	-1.11864
0.861195	-16.6568	-1.39955
0.858246	-16.7949	-1.69434
0.855319	-16.9781	-1.99302
0.852156	-17.1354	-2.28951
0.84946	-17.2956	-2.59646
0.846226	-17.4688	-2.90217
0.843363	-17.6459	-3.21415
0.840202	-17.7863	-3.51509
0.837324	-17.9435	-3.83706
0.834224	-18.1197	-4.1686
0.831157	-18.2901	-4.51631
0.828166	-18.4603	-4.85695
0.825288	-18.6563	-5.20494
0.822267	-18.8401	-5.56534
0.819359	-19.0102	-5.94117
0.816605	-19.1753	-6.31311
0.813186	-19.3835	-6.69392
0.810251	-19.5706	-7.08161
0.807257	-19.7562	-7.45001
0.804328	-19.975	-7.856
0.801366	-20.1528	-8.25665
0.798246	-20.3492	-8.66297
0.795281	-20.5595	-9.08305
0.792238	-20.799	-9.51528
0.788814	-21.0167	-9.96025
0.78611	-21.2474	-10.4148
0.782998	-21.4338	-10.8705
0.78014	-21.6773	-11.3536
0.777188	-21.9159	-11.8357
0.773952	-22.1435	-12.3478
0.771208	-22.345	-12.8509
0.768795	-22.5694	-13.3806
0.765187	-22.8263	-13.9116
0.762219	-23.0225	-14.4574
0.75916	-23.2597	-15.0354
0.756105	-23.4707	-15.5907
0.753483	-23.7088	-16.1813
0.749506	-23.9755	-16.7891
0.74719	-24.25	-17.4046
0.744136	-24.5311	-18.0385
0.740995	-24.8103	-18.681
0.738138	-25.0682	-19.3275
0.735134	-25.3207	-19.9875
0.732244	-25.5969	-20.6574
0.729133	-25.8587	-21.3521
0.726054	-26.1426	-22.0643
0.723299	-26.3984	-22.7717
0.72005	-26.6395	-23.4822
0.717217	-26.8889	-24.202
0.713982	-27.1689	-24.9381
0.711187	-27.4535	-25.6835
0.707951	-27.6979	-26.4387
0.705036	-27.9527	-27.2148
0.702098	-28.2173	-27.999
0.698872	-28.4829	-28.795
0.696146	-28.7185	-29.5837
0.693065	-29.0042	-30.3969
0.690164	-29.2858	-31.2073
0.687019	-29.5692	-32.0431
0.68423	-29.8415	-32.8624
0.680996	-30.1215	-33.7033
0.67786	-30.3794	-34.54
0.675018	-30.6815	-35.3868
0.67209	-30.9498	-36.2476
0.66911	-31.2267	-37.1127
0.666061	-31.4592	-37.9955
0.66297	-31.7507	-38.8725
0.66019	-32.0481	-39.7674
0.657017	-32.3123	-40.6588
0.654279	-32.5972	-41.5614
0.65116	-32.8412	-42.4661
0.647969	-33.1223	-43.3703
0.645126	-33.4037	-44.2822
0.64198	-33.6935	-45.195
0.638829	-33.9773	-46.1182
0.635842	-34.2604	-47.0503
0.633064	-34.5284	-47.9871
0.629962	-34.7918	-48.9268
0.62695	-35.1183	-49.8561
0.623954	-35.4035	-50.8049
0.620867	-35.7464	-51.7494
0.61797	-36.0221	-52.7132
0.614838	-36.3815	-53.6733
0.611974	-36.6794	-54.6303
0.60896	-37.0019	-55.6226
0.605955	-37.2844	-56.607
0.602916	-37.6107	-57.5868
0.60001	-37.9437	-58.5688
0.596929	-38.2672	-59.5508
0.593948	-38.5896	-60.5294
0.591119	-38.9628	-61.5308
0.58755	-39.3171	-62.5394
0.584783	-39.6644	-63.5578
0.581886	-40.0234	-64.5646
0.578933	-40.3951	-65.5757
0.575836	-40.7597	-66.6081
0.572944	-41.1367	-67.6431
0.56995	-41.5327	-68.699
0.566924	-41.8931	-69.7639
0.564051	-42.2685	-70.83
0.560921	-42.6789	-71.9073
0.55776	-43.077	-72.9833
0.555039	-43.4916	-74.0588
0.551826	-43.8992	-75.1381
0.548837	-44.3139	-76.2366
0.545838	-44.7316	-77.3312
0.542839	-45.1209	-78.4361
0.540011	-45.5031	-79.5334
0.536869	-45.8988	-80.6441
0.533983	-46.3004	-81.7584
0.531021	-46.7198	-82.8722
0.527698	-47.0962	-83.9917
0.524792	-47.4908	-85.0976
0.521799	-47.9173	-86.2169
0.51891	-48.326	-87.3321
0.515823	-48.6937	-88.4537
0.512811	-49.0366	-89.5929
0.509949	-49.4261	-90.7313
0.506888	-49.8007	-91.8676
0.503936	-50.1943	-93.0129
0.500859	-50.5662	-94.1679
0.497744	-50.9386	-95.3148
0.494768	-51.2867	-96.4663
0.491724	-51.6342	-97.6189
0.488892	-51.9794	-98.7647
0.485823	-52.3056	-99.8941
0.483051	-52.6514	-101.034
0.479709	-52.9458	-102.17
0.476688	-53.2725	-103.288
0.473638	-53.5333	-104.419
0.470768	-53.8228	-105.544
0.467776	-54.0726	-106.662
0.464806	-54.3915	-107.776
0.46176	-54.6519	-108.869
0.458711	-54.9177	-109.958
0.455754	-55.1574	-111.055
0.452803	-55.3758	-112.143
0.449704	-55.6125	-113.226
0.44692	-55.8498	-114.309
0.443722	-56.0203	-115.368
0.440802	-56.2028	-116.427
0.437523	-56.3797	-117.466
0.434695	-56.5658	-118.512
0.431724	-56.7103	-119.546
0.42873	-56.8492	-120.565
0.425643	-56.9742	-121.57
0.422793	-57.1051	-122.56
0.41982	-57.286	-123.539
0.416689	-57.4214	-124.504
0.41377	-57.5062	-125.46
0.4107	-57.6626	-126.402
0.40764	-57.7644	-127.329
0.40464	-57.8456	-128.251
0.401672	-57.97	-129.166
0.398787	-58.0275	-130.073
0.395742	-58.1585	-130.961
0.392565	-58.2384	-131.844
0.389972	-58.3358	-132.713
0.386654	-58.3946	-133.572
0.383694	-58.5014	-134.426
0.380481	-58.5687	-135.264
0.377627	-58.6691	-136.109
0.374613	-58.7055	-136.929
0.37167	-58.775	-137.742
0.368873	-58.868	-138.547
0.365487	-58.9712	-139.328
0.362802	-59.0549	-140.099
0.359484	-59.1352	-140.859
0.356651	-59.2306	-141.611
0.353584	-59.3005	-142.352
0.350561	-59.3656	-143.071
0.348331	-59.4538	-143.78
0.344522	-59.5471	-144.475
0.341689	-59.677	-145.169
0.338633	-59.7634	-145.861
0.335533	-59.8488	-146.534
0.332739	-59.9594	-147.187
0.329688	-60.0909	-147.829
0.32653	-60.198	-148.465
0.323424	-60.3096	-149.081
0.320609	-60.4343	-149.69
0.317484	-60.5367	-150.278
0.314884	-60.6657	-150.864
0.311374	-60.8173	-151.437
0.308507	-60.9545	-151.998
0.305493	-61.0925	-152.557
0.302606	-61.2277	-153.1
0.299449	-61.3841	-153.626
0.296517	-61.5502	-154.149
0.293466	-61.7435	-154.663
0.290367	-61.9154	-155.164
0.287533	-62.113	-155.643
0.284608	-62.3284	-156.117
0.281379	-62.5514	-156.578
0.278463	-62.7671	-157.016
0.275493	-62.9769	-157.453
0.272526	-63.1706	-157.868
0.269396	-63.3851	-158.287
0.266628	-63.6247	-158.69
0.263242	-63.8121	-159.08
0.260408	-64.0031	-159.464
0.257601	-64.2682	-159.828
0.254499	-64.4734	-160.179
0.251422	-64.707	-160.522
0.248612	-64.9093	-160.859
0.245489	-65.1809	-161.177
0.242574	-65.3997	-161.488
0.239348	-65.6532	-161.776
0.236323	-65.8817	-162.057
0.23367	-66.1362	-162.33
0.230405	-66.3699	-162.584
0.227375	-66.6166	-162.828
0.224416	-66.8827	-163.061
0.22136	-67.1348	-163.288
0.218548	-67.3778	-163.506
0.215428	-67.6294	-163.713
0.212394	-67.9288	-163.916
0.209775	-68.1906	-164.091
0.206487	-68.4742	-164.251
0.203124	-68.7359	-164.422
0.200408	-69.0193	-164.574
0.197425	-69.3213	-164.715
0.19438	-69.591	-164.845
0.191352	-69.9248	-164.971
0.188386	-70.2525	-165.083
0.185278	-70.6107	-165.2
0.182357	-70.9491	-165.313
0.179326	-71.2964	-165.417
0.176442	-71.6708	-165.521
0.173339	-72.0602	-165.606
0.170446	-72.4819	-165.691
0.167346	-72.9334	-165.764
0.164235	-73.4061	-165.834
0.161411	-73.9719	-165.901
0.15828	-74.6379	-165.969
0.155388	-75.3773	-166.043
0.152323	-76.2741	-166.121
0.14907	-77.2878	-166.215
0.146497	-78.4099	-166.309
0.143376	-79.6847	-166.432
0.140248	-81.1185	-166.577
0.137148	-82.7065	-166.736
0.134289	-84.459	-166.924
0.131389	-86.4619	-167.153
0.128419	-88.6414	-167.405
0.12533	-91.0293	-167.696
0.122413	-93.6757	-168.011
0.119165	-96.5205	-168.363
0.116376	-99.6221	-168.746
0.113292	-102.992	-169.175
0.110277	-106.529	-169.653
0.107357	-110.317	-170.155
0.104365	-114.346	-170.698
0.101224	-118.601	-171.275
0.0983397	-123.072	-171.89
0.0952162	-127.813	-172.546
0.0923069	-132.762	-173.253
0.0894724	-137.898	-173.993
0.0862097	-143.282	-174.761
0.0834436	-148.928	-175.518
0.0802504	-152.157	-175.904
0.0773469	-155.655	-176.324
0.0740067	-159.409	-176.786
0.0712658	-163.507	-177.308
0.0684994	-168.026	-177.876
0.0652377	-172.926	-178.516
0.0622804	-178.316	-179.229
0.0591237	-184.195	-180.021
0.0564768	-190.859	-180.898
0.053197	-198.207	-181.926
0.0501798	-206.403	-183.091
0.0472146	-215.297	-184.388
0.0442437	-224.797	-185.854
0.0412638	-234.864	-187.442
0.0381892	-245.485	-189.143
0.0351844	-256.603	-190.936
0.0321431	-268.028	-192.774
0.0292281	-279.542	-194.648
0.0259958	-291.117	-196.567
0.0231563	-302.551	-198.371
0.0201646	-314.106	-200.185
0.0169849	-325.569	-201.972
0.0141457	-337.042	-203.447

## Sheet: XPS data C1
Name		C 1s	C 1s	C 1s	C 1s	C 1s			Name		C 1s	C 1s	C 1s	C 1s	C 1s			Name		C 1s	C 1s	C 1s	C 1s	C 1s
Position		283.1	284.74	286.31	288.57	290.1			Position		283.37	284.86	286.43	288.4	289.92			Position		283.36	284.84	286.51	288.34	290.1
FWHM Area Lineshape B.E.	Cycle 3:surface:C1s Scan:CPS	0.95 3625.45 GL(30) C1s Scan:C 1s	1.31 149625.76 GL(30) C1s Scan:C 1s	1.50 28263.65 GL(30) C1s Scan:C 1s	1.81 22293.76 GL(30) C1s Scan:C 1s	1.29 12760.88 LA(1.53,243) C1s Scan:C 1s	Background	Envelope	FWHM Area Lineshape B.E.	Cycle 60.048:60 seconds:C1s Scan:CPS	1.56 16327.56 GL(30) C1s Scan:C 1s	1.50 104598.71 GL(30) C1s Scan:C 1s	1.50 26320.32 GL(30) C1s Scan:C 1s	2.00 23899.58 GL(30) C1s Scan:C 1s	1.51 33438.42 LA(1.53,243) C1s Scan:C 1s	Background	Envelope	FWHM Area Lineshape B.E.	Cycle 500:500 seconds:C1s Scan:CPS	1.31 36039.92 GL(30) C1s Scan:C 1s	1.64 110425.48 GL(30) C1s Scan:C 1s	1.50 17271.29 GL(30) C1s Scan:C 1s	2.00 19301.42 GL(30) C1s Scan:C 1s	1.60 29641.14 GL(30) C1s Scan:C 1s	Background	Envelope
303.465	13166.1	13166.1	13166.1	13166.1	13166.1	13166.3	13166.1	13166.3	303.742	12459	12459	12459	12459	12459	12459.8	12459	12459.8	303.959	13411.6	13411.6	13411.6	13411.6	13411.6	13411.6	13411.6	13411.6
303.365	13107.4	13107.4	13107.4	13107.4	13107.4	13107.6	13107.4	13107.6	303.642	12505.4	12505.4	12505.4	12505.4	12505.4	12506.1	12505.4	12506.1	303.859	13128.4	13128.4	13128.4	13128.4	13128.4	13128.4	13128.4	13128.4
303.265	12877.1	12877.1	12877.1	12877.1	12877.1	12877.4	12877.1	12877.4	303.542	12521.9	12521.9	12521.9	12521.9	12521.9	12522.7	12521.9	12522.7	303.759	13078.5	13078.5	13078.5	13078.5	13078.5	13078.5	13078.5	13078.5
303.165	12864.5	12864.5	12864.5	12864.5	12864.5	12864.7	12864.5	12864.7	303.442	12059.4	12059.4	12059.4	12059.4	12059.4	12060.2	12059.4	12060.2	303.659	12801.6	12801.6	12801.6	12801.6	12801.6	12801.6	12801.6	12801.6
303.065	12832.5	12832.5	12832.5	12832.5	12832.5	12832.8	12832.5	12832.8	303.342	12072.8	12072.8	12072.8	12072.8	12072.8	12073.6	12072.8	12073.6	303.559	13211.7	13211.7	13211.7	13211.7	13211.7	13211.7	13211.7	13211.7
302.965	12947.1	12947.1	12947.1	12947.1	12947.1	12947.4	12947.1	12947.4	303.242	12290.7	12290.7	12290.7	12290.7	12290.7	12291.6	12290.7	12291.6	303.459	12928.7	12928.7	12928.7	12928.7	12928.7	12928.7	12928.7	12928.7
302.865	12873	12873	12873	12873	12873	12873.3	12873	12873.3	303.142	11978	11978	11978	11978	11978	11978.9	11978	11978.9	303.359	13032.1	13032.1	13032.1	13032.1	13032.1	13032.1	13032.1	13032.1
302.765	12916.9	12916.9	12916.9	12916.9	12916.9	12917.2	12916.9	12917.2	303.042	11941.6	11941.6	11941.6	11941.6	11941.6	11942.4	11941.6	11942.4	303.259	12973.9	12973.9	12973.9	12973.9	12973.9	12973.9	12973.9	12973.9
302.665	12853.8	12853.8	12853.8	12853.8	12853.8	12854	12853.8	12854	302.942	12078.7	12078.7	12078.7	12078.7	12078.7	12079.6	12078.7	12079.6	303.159	12920.2	12920.2	12920.2	12920.2	12920.2	12920.2	12920.2	12920.2
302.565	12562.7	12562.7	12562.7	12562.7	12562.7	12563	12562.7	12563	302.842	12157.8	12157.8	12157.8	12157.8	12157.8	12158.7	12157.8	12158.7	303.059	12901.6	12901.6	12901.6	12901.6	12901.6	12901.6	12901.6	12901.6
302.465	12936.5	12936.5	12936.5	12936.5	12936.5	12936.8	12936.5	12936.8	302.742	12138.9	12138.9	12138.9	12138.9	12138.9	12139.8	12138.9	12139.8	302.959	12851.9	12851.9	12851.9	12851.9	12851.9	12851.9	12851.9	12851.9
302.365	12718.2	12718.2	12718.2	12718.2	12718.2	12718.5	12718.2	12718.5	302.642	11902.2	11902.2	11902.2	11902.2	11902.2	11903.2	11902.2	11903.2	302.859	12932.9	12932.9	12932.9	12932.9	12932.9	12932.9	12932.9	12932.9
302.265	12835.4	12835.4	12835.4	12835.4	12835.4	12835.7	12835.4	12835.7	302.542	12029.3	12029.3	12029.3	12029.3	12029.3	12030.3	12029.3	12030.3	302.759	12740.1	12740.1	12740.1	12740.1	12740.1	12740.1	12740.1	12740.1
302.165	12621.7	12621.7	12621.7	12621.7	12621.7	12622	12621.7	12622	302.442	12154.8	12154.8	12154.8	12154.8	12154.8	12155.8	12154.8	12155.8	302.659	12902	12902	12902	12902	12902	12902	12902	12902
302.065	12773.5	12773.5	12773.5	12773.5	12773.5	12773.8	12773.5	12773.8	302.342	11982.5	11982.5	11982.5	11982.5	11982.5	11983.5	11982.5	11983.5	302.559	12750.8	12750.8	12750.8	12750.8	12750.8	12750.8	12750.8	12750.8
301.965	12611.4	12611.4	12611.4	12611.4	12611.4	12611.8	12611.4	12611.8	302.242	11891.9	11891.9	11891.9	11891.9	11891.9	11893	11891.9	11893	302.459	12451	12451	12451	12451	12451	12451	12451	12451
301.865	12456.1	12456.1	12456.1	12456.1	12456.1	12456.5	12456.1	12456.5	302.142	12094.6	12094.6	12094.6	12094.6	12094.6	12095.7	12094.6	12095.7	302.359	12643.3	12643.3	12643.3	12643.3	12643.3	12643.3	12643.3	12643.3
301.765	12443.5	12443.5	12443.5	12443.5	12443.5	12443.8	12443.5	12443.8	302.042	11966.6	11966.6	11966.6	11966.6	11966.6	11967.7	11966.6	11967.7	302.259	12666.5	12666.5	12666.5	12666.5	12666.5	12666.5	12666.5	12666.5
301.665	12126.7	12126.7	12126.7	12126.7	12126.7	12127	12126.7	12127	301.942	12163	12163	12163	12163	12163	12164.2	12163	12164.2	302.159	12594.8	12594.8	12594.8	12594.8	12594.8	12594.8	12594.8	12594.8
301.565	12067.2	12067.2	12067.2	12067.2	12067.2	12067.6	12067.2	12067.6	301.842	11867.9	11867.9	11867.9	11867.9	11867.9	11869.1	11867.9	11869.1	302.059	12732.1	12732.1	12732.1	12732.1	12732.1	12732.1	12732.1	12732.1
301.465	12170.3	12170.3	12170.3	12170.3	12170.3	12170.7	12170.3	12170.7	301.742	11791.3	11791.3	11791.3	11791.3	11791.3	11792.5	11791.3	11792.5	301.959	12731.9	12731.9	12731.9	12731.9	12731.9	12731.9	12731.9	12731.9
301.365	12108.6	12108.6	12108.6	12108.6	12108.6	12109	12108.6	12109	301.642	11543.3	11543.3	11543.3	11543.3	11543.3	11544.5	11543.3	11544.5	301.859	12245.8	12245.8	12245.8	12245.8	12245.8	12245.8	12245.8	12245.8
301.265	11923.4	11923.4	11923.4	11923.4	11923.4	11923.8	11923.4	11923.8	301.542	11779.4	11779.4	11779.4	11779.4	11779.4	11780.7	11779.4	11780.7	301.759	12291.8	12291.8	12291.8	12291.8	12291.8	12291.8	12291.8	12291.8
301.165	11887.9	11887.9	11887.9	11887.9	11887.9	11888.3	11887.9	11888.3	301.442	11793.7	11793.7	11793.7	11793.7	11793.7	11795	11793.7	11795	301.659	12441.6	12441.6	12441.6	12441.6	12441.6	12441.6	12441.6	12441.6
301.065	11735.5	11735.5	11735.5	11735.5	11735.5	11735.9	11735.5	11735.9	301.342	11497.4	11497.4	11497.4	11497.4	11497.4	11498.8	11497.4	11498.8	301.559	12504.5	12504.5	12504.5	12504.5	12504.5	12504.5	12504.5	12504.5
300.965	11317.5	11317.5	11317.5	11317.5	11317.5	11317.9	11317.5	11317.9	301.242	11704.4	11704.4	11704.4	11704.4	11704.4	11705.8	11704.4	11705.8	301.459	12061.6	12061.6	12061.6	12061.6	12061.6	12061.6	12061.6	12061.6
300.865	11373.1	11373.1	11373.1	11373.1	11373.1	11373.5	11373.1	11373.5	301.142	11584.3	11584.3	11584.3	11584.3	11584.3	11585.8	11584.3	11585.8	301.359	12086.1	12086.1	12086.1	12086.1	12086.1	12086.1	12086.1	12086.1
300.765	11426	11426	11426	11426	11426	11426.5	11426	11426.5	301.042	11397.7	11397.7	11397.7	11397.7	11397.7	11399.1	11397.7	11399.1	301.259	12190.2	12190.2	12190.2	12190.2	12190.2	12190.2	12190.2	12190.2
300.665	11278.5	11278.5	11278.5	11278.5	11278.5	11279	11278.5	11279	300.942	11313.1	11313.1	11313.1	11313.1	11313.1	11314.6	11313.1	11314.6	301.159	11831.3	11831.3	11831.3	11831.3	11831.3	11831.3	11831.3	11831.3
300.565	11365	11365	11365	11365	11365	11365.5	11365	11365.5	300.842	11142.4	11142.4	11142.4	11142.4	11142.4	11144	11142.4	11144	301.059	11698.8	11698.8	11698.8	11698.8	11698.8	11698.8	11698.8	11698.8
300.465	11241.9	11241.9	11241.9	11241.9	11241.9	11242.4	11241.9	11242.4	300.742	11264.8	11264.8	11264.8	11264.8	11264.8	11266.4	11264.8	11266.4	300.959	11673.4	11673.4	11673.4	11673.4	11673.4	11673.4	11673.4	11673.4
300.365	11350.2	11350.2	11350.2	11350.2	11350.2	11350.8	11350.2	11350.8	300.642	10970.8	10970.8	10970.8	10970.8	10970.8	10972.4	10970.8	10972.4	300.859	11830.1	11830.1	11830.1	11830.1	11830.1	11830.1	11830.1	11830.1
300.265	11187.2	11187.2	11187.2	11187.2	11187.2	11187.7	11187.2	11187.7	300.542	10891.5	10891.5	10891.5	10891.5	10891.5	10893.1	10891.5	10893.1	300.759	11719.3	11719.3	11719.3	11719.3	11719.3	11719.3	11719.3	11719.3
300.165	11112.5	11112.5	11112.5	11112.5	11112.5	11113	11112.5	11113	300.442	10942	10942	10942	10942	10942	10943.7	10942	10943.7	300.659	11339.8	11339.8	11339.8	11339.8	11339.8	11339.8	11339.8	11339.8
300.065	10802.8	10802.8	10802.8	10802.8	10802.8	10803.4	10802.8	10803.4	300.342	10674.7	10674.7	10674.7	10674.7	10674.7	10676.5	10674.7	10676.5	300.559	11576.4	11576.4	11576.4	11576.4	11576.4	11576.4	11576.4	11576.4
299.965	10985.9	10985.9	10985.9	10985.9	10985.9	10986.4	10985.9	10986.4	300.242	10661.3	10661.3	10661.3	10661.3	10661.3	10663.2	10661.3	10663.2	300.459	11337.4	11337.4	11337.4	11337.4	11337.4	11337.4	11337.4	11337.4
299.865	10544.7	10544.7	10544.7	10544.7	10544.7	10545.3	10544.7	10545.3	300.142	10500.5	10500.5	10500.5	10500.5	10500.5	10502.4	10500.5	10502.4	300.359	11151	11151	11151	11151	11151	11151	11151	11151
299.765	10608.3	10608.3	10608.3	10608.3	10608.3	10608.9	10608.3	10608.9	300.042	10357.9	10357.9	10357.9	10357.9	10357.9	10359.9	10357.9	10359.9	300.259	11130.1	11130.1	11130.1	11130.1	11130.1	11130.1	11130.1	11130.1
299.665	10806.3	10806.3	10806.3	10806.3	10806.3	10806.9	10806.3	10806.9	299.942	10535.4	10535.4	10535.4	10535.4	10535.4	10537.4	10535.4	10537.4	300.159	11201.2	11201.2	11201.2	11201.2	11201.2	11201.2	11201.2	11201.2
299.565	10616.6	10616.6	10616.6	10616.6	10616.6	10617.3	10616.6	10617.3	299.842	10609.1	10609.1	10609.1	10609.1	10609.1	10611.2	10609.1	10611.2	300.059	11130.2	11130.2	11130.2	11130.2	11130.2	11130.2	11130.2	11130.2
299.465	10361.7	10361.7	10361.7	10361.7	10361.7	10362.3	10361.7	10362.3	299.742	10449.3	10449.3	10449.3	10449.3	10449.3	10451.4	10449.3	10451.4	299.959	11073.8	11073.8	11073.8	11073.8	11073.8	11073.8	11073.8	11073.8
299.365	10346.2	10346.2	10346.2	10346.2	10346.2	10347	10346.2	10347	299.642	10383.1	10383.1	10383.1	10383.1	10383.1	10385.4	10383.1	10385.4	299.859	11063.6	11063.6	11063.6	11063.6	11063.6	11063.6	11063.6	11063.6
299.265	10553.4	10553.4	10553.4	10553.4	10553.4	10554.1	10553.4	10554.1	299.542	10428.1	10428.1	10428.1	10428.1	10428.1	10430.4	10428.1	10430.4	299.759	11111.8	11111.8	11111.8	11111.8	11111.8	11111.8	11111.8	11111.8
299.165	10432	10432	10432	10432	10432	10432.8	10432	10432.8	299.442	10502.2	10502.2	10502.2	10502.2	10502.2	10504.6	10502.2	10504.6	299.659	10936.7	10936.7	10936.7	10936.7	10936.7	10936.7	10936.7	10936.7
299.065	10204.4	10204.4	10204.4	10204.4	10204.4	10205.2	10204.4	10205.2	299.342	10064.9	10064.9	10064.9	10064.9	10064.9	10067.4	10064.9	10067.4	299.559	10876.5	10876.5	10876.5	10876.5	10876.5	10876.5	10876.5	10876.5
298.965	10268.6	10268.6	10268.6	10268.6	10268.6	10269.5	10268.6	10269.5	299.242	10338	10338	10338	10338	10338	10340.5	10338	10340.5	299.459	11051	11051	11051	11051	11051	11051	11051	11051
298.865	10302.7	10302.7	10302.7	10302.7	10302.7	10303.6	10302.7	10303.6	299.142	10297.8	10297.8	10297.8	10297.8	10297.8	10300.4	10297.8	10300.4	299.359	11014.1	11014.1	11014.1	11014.1	11014.1	11014.1	11014.1	11014.1
298.765	10087.8	10087.8	10087.8	10087.8	10087.8	10088.7	10087.8	10088.7	299.042	9957.16	9957.16	9957.16	9957.16	9957.16	9959.86	9957.16	9959.86	299.259	10716.6	10716.6	10716.6	10716.6	10716.6	10716.6	10716.6	10716.6
298.665	9816.82	9816.82	9816.82	9816.82	9816.82	9817.72	9816.82	9817.72	298.942	10062.4	10062.4	10062.4	10062.4	10062.4	10065.2	10062.4	10065.2	299.159	10491.2	10491.2	10491.2	10491.2	10491.2	10491.2	10491.2	10491.2
298.565	9822.92	9822.92	9822.92	9822.92	9822.92	9823.85	9822.92	9823.85	298.842	10023	10023	10023	10023	10023	10025.9	10023	10025.9	299.059	10622.6	10622.6	10622.6	10622.6	10622.6	10622.6	10622.6	10622.6
298.465	9852.8	9852.8	9852.8	9852.8	9852.8	9853.76	9852.8	9853.76	298.742	10210.3	10210.3	10210.3	10210.3	10210.3	10213.3	10210.3	10213.3	298.959	10757.6	10757.6	10757.6	10757.6	10757.6	10757.6	10757.6	10757.6
298.365	9866.66	9866.66	9866.66	9866.66	9866.66	9867.66	9866.66	9867.66	298.642	9949.14	9949.14	9949.14	9949.14	9949.14	9952.27	9949.14	9952.27	298.859	10577	10577	10577	10577	10577	10577	10577	10577
298.265	9720.64	9720.64	9720.64	9720.64	9720.64	9721.68	9720.64	9721.68	298.542	10030.4	10030.4	10030.4	10030.4	10030.4	10033.6	10030.4	10033.6	298.759	10580.7	10580.7	10580.7	10580.7	10580.7	10580.7	10580.7	10580.7
298.165	9740.92	9740.92	9740.92	9740.92	9740.92	9742.01	9740.92	9742.01	298.442	9825.74	9825.74	9825.74	9825.74	9825.74	9829.09	9825.74	9829.09	298.659	10454.8	10454.8	10454.8	10454.8	10454.8	10454.8	10454.8	10454.8
298.065	9427.42	9427.42	9427.42	9427.42	9427.42	9428.55	9427.42	9428.55	298.342	9680.88	9680.88	9680.88	9680.88	9680.88	9684.34	9680.88	9684.34	298.559	10396	10396	10396	10396	10396	10396	10396	10396
297.965	9496.54	9496.54	9496.54	9496.54	9496.54	9497.71	9496.54	9497.71	298.242	9742.26	9742.26	9742.26	9742.26	9742.26	9745.84	9742.26	9745.84	298.459	10474.3	10474.3	10474.3	10474.3	10474.3	10474.3	10474.3	10474.3
297.865	9384.88	9384.88	9384.88	9384.88	9384.88	9386.09	9384.88	9386.09	298.142	9669.72	9669.72	9669.72	9669.72	9669.72	9673.45	9669.72	9673.45	298.359	10209.9	10209.9	10209.9	10209.9	10209.9	10209.9	10209.9	10209.9
297.765	9512.04	9512.04	9512.04	9512.04	9512.04	9513.3	9512.04	9513.3	298.042	9607.86	9607.86	9607.86	9607.86	9607.86	9611.76	9607.86	9611.76	298.259	10246.8	10246.8	10246.8	10246.8	10246.8	10246.8	10246.8	10246.8
297.665	9106.8	9106.8	9106.8	9106.8	9106.8	9108.12	9106.8	9108.12	297.942	9480.66	9480.66	9480.66	9480.66	9480.66	9484.72	9480.66	9484.72	298.159	10267.5	10267.5	10267.5	10267.5	10267.5	10267.5	10267.5	10267.5
297.565	8811.9	8811.9	8811.9	8811.9	8811.9	8813.28	8811.9	8813.28	297.842	9446.08	9446.08	9446.08	9446.08	9446.08	9450.31	9446.08	9450.31	298.059	9994.64	9994.64	9994.64	9994.64	9994.64	9994.64	9994.64	9994.64
297.465	8918.86	8918.86	8918.86	8918.86	8918.86	8920.3	8918.86	8920.3	297.742	9519.3	9519.3	9519.3	9519.3	9519.3	9523.69	9519.3	9523.69	297.959	9989.52	9989.52	9989.52	9989.52	9989.52	9989.52	9989.52	9989.52
297.365	8926.08	8926.08	8926.08	8926.08	8926.08	8927.58	8926.08	8927.58	297.642	9157.94	9157.94	9157.94	9157.94	9157.94	9162.5	9157.94	9162.5	297.859	9913.66	9913.66	9913.66	9913.66	9913.66	9913.66	9913.66	9913.66
297.265	8677.5	8677.5	8677.5	8677.5	8677.5	8679.06	8677.5	8679.06	297.542	9121.82	9121.82	9121.82	9121.82	9121.82	9126.54	9121.82	9126.54	297.759	9665.7	9665.7	9665.7	9665.7	9665.7	9665.7	9665.7	9665.7
297.165	8603.18	8603.18	8603.18	8603.18	8603.18	8604.8	8603.18	8604.8	297.442	9051.74	9051.74	9051.74	9051.74	9051.74	9056.65	9051.74	9056.65	297.659	9883.04	9883.04	9883.04	9883.04	9883.04	9883.04	9883.04	9883.04
297.065	8564.8	8564.8	8564.8	8564.8	8564.8	8566.51	8564.8	8566.51	297.342	9080.32	9080.32	9080.32	9080.32	9080.32	9085.48	9080.32	9085.48	297.559	9822.66	9822.66	9822.66	9822.66	9822.66	9822.66	9822.66	9822.66
296.965	8423	8423	8423	8423	8423	8424.8	8423	8424.8	297.242	9079.7	9079.7	9079.7	9079.7	9079.7	9085.11	9079.7	9085.11	297.459	9704.72	9704.72	9704.72	9704.72	9704.72	9704.72	9704.72	9704.72
296.865	8458.02	8458.02	8458.02	8458.02	8458.02	8459.9	8458.02	8459.9	297.142	9079.66	9079.66	9079.66	9079.66	9079.66	9085.32	9079.66	9085.32	297.359	9621.72	9621.72	9621.72	9621.72	9621.72	9621.72	9621.72	9621.72
296.765	8188.74	8188.74	8188.74	8188.74	8188.74	8190.71	8188.74	8190.71	297.042	8964	8964	8964	8964	8964	8969.91	8964	8969.91	297.259	9895.24	9895.24	9895.24	9895.24	9895.24	9895.24	9895.24	9895.24
296.665	8362.72	8362.72	8362.72	8362.72	8362.72	8364.78	8362.72	8364.78	296.942	9044.22	9044.22	9044.22	9044.22	9044.22	9050.38	9044.22	9050.38	297.159	9737.74	9737.74	9737.74	9737.74	9737.74	9737.74	9737.74	9737.74
296.565	8039.14	8039.14	8039.14	8039.14	8039.14	8041.28	8039.14	8041.28	296.842	8871.72	8871.72	8871.72	8871.72	8871.72	8878.13	8871.72	8878.13	297.059	9539.68	9539.68	9539.68	9539.68	9539.68	9539.68	9539.68	9539.68
296.465	7840.7	7840.7	7840.7	7840.7	7840.7	7842.96	7840.7	7842.96	296.742	8648.72	8648.72	8648.72	8648.72	8648.72	8655.38	8648.72	8655.38	296.959	9550.76	9550.76	9550.76	9550.76	9550.76	9550.76	9550.76	9550.76
296.365	7925.34	7925.34	7925.34	7925.34	7925.34	7927.73	7925.34	7927.73	296.642	8632.08	8632.08	8632.08	8632.08	8632.08	8639.09	8632.08	8639.09	296.859	9590.48	9590.48	9590.48	9590.48	9590.48	9590.48	9590.48	9590.48
296.265	7995.42	7995.42	7995.42	7995.42	7995.42	7997.94	7995.42	7997.94	296.542	8461.56	8461.56	8461.56	8461.56	8461.56	8468.97	8461.56	8468.97	296.759	9559.56	9559.56	9559.56	9559.56	9559.56	9559.56	9559.56	9559.56
296.165	7850.28	7850.28	7850.28	7850.28	7850.28	7852.93	7850.28	7852.93	296.442	8449	8449	8449	8449	8449	8456.81	8449	8456.81	296.659	9380.1	9380.1	9380.1	9380.1	9380.1	9380.1	9380.1	9380.1
296.065	7670.34	7670.34	7670.34	7670.34	7670.34	7673.13	7670.34	7673.13	296.342	8682.96	8682.96	8682.96	8682.96	8682.96	8691.17	8682.96	8691.17	296.559	9583.22	9583.22	9583.22	9583.22	9583.22	9583.22	9583.22	9583.22
295.965	7654.92	7654.92	7654.92	7654.92	7654.92	7657.84	7654.92	7657.84	296.242	8715.42	8715.42	8715.42	8715.42	8715.42	8724.03	8715.42	8724.03	296.459	9252.78	9252.78	9252.78	9252.78	9252.78	9252.78	9252.78	9252.78
295.865	7630.28	7630.28	7630.28	7630.28	7630.28	7633.35	7630.28	7633.35	296.142	8665.5	8665.5	8665.5	8665.5	8665.5	8674.51	8665.5	8674.51	296.359	9530.36	9530.36	9530.36	9530.36	9530.36	9530.36	9530.36	9530.36
295.765	7606.4	7606.4	7606.4	7606.4	7606.4	7609.68	7606.4	7609.68	296.042	8349.74	8349.74	8349.74	8349.74	8349.74	8359.15	8349.74	8359.15	296.259	9347.94	9347.94	9347.94	9347.94	9347.94	9347.94	9347.94	9347.94
295.665	7365.88	7365.88	7365.88	7365.88	7365.88	7369.37	7365.88	7369.37	295.942	8286.38	8286.38	8286.38	8286.38	8286.38	8296.23	8286.38	8296.23	296.159	9631.88	9631.88	9631.88	9631.88	9631.88	9631.88	9631.88	9631.88
295.565	7546.82	7546.82	7546.82	7546.82	7546.82	7550.52	7546.82	7550.52	295.842	8285.84	8285.84	8285.84	8285.84	8285.84	8296.37	8285.84	8296.37	296.059	9497.42	9497.42	9497.42	9497.42	9497.42	9497.42	9497.42	9497.42
295.465	7318.56	7318.56	7318.56	7318.56	7318.56	7322.47	7318.56	7322.47	295.742	8350.84	8350.84	8350.84	8350.84	8350.84	8362.05	8350.84	8362.05	295.959	9288.84	9288.84	9288.84	9288.84	9288.84	9288.84	9288.84	9288.84
295.365	7212.42	7212.42	7212.42	7212.42	7212.42	7216.54	7212.42	7216.54	295.642	8487.84	8487.84	8487.84	8487.84	8487.84	8499.73	8487.84	8499.73	295.859	9238.74	9238.74	9238.74	9238.74	9238.74	9238.74	9238.74	9238.74
295.265	7284.54	7284.54	7284.54	7284.54	7284.54	7288.87	7284.54	7288.87	295.542	8372.22	8372.22	8372.22	8372.22	8372.22	8384.43	8372.22	8384.43	295.759	9284.46	9284.46	9284.46	9284.46	9284.46	9284.46	9284.46	9284.46
295.165	7085	7085	7085	7085	7085	7089.66	7085	7089.66	295.442	8399.86	8399.86	8399.86	8399.86	8399.86	8412.78	8399.86	8412.78	295.659	9210.98	9210.98	9210.98	9210.98	9210.98	9210.98	9210.98	9210.98
295.065	7196.42	7196.42	7196.42	7196.42	7196.42	7201.44	7196.42	7201.44	295.342	8239.2	8239.2	8239.2	8239.2	8239.2	8252.9	8239.2	8252.9	295.559	9231.12	9231.12	9231.12	9231.12	9231.12	9231.12	9231.12	9231.12
294.965	6978.48	6978.48	6978.48	6978.48	6978.48	6983.85	6978.48	6983.85	295.242	8214.34	8214.34	8214.34	8214.34	8214.34	8228.87	8214.34	8228.87	295.459	9226.9	9226.9	9226.9	9226.9	9226.9	9226.9	9226.9	9226.9
294.865	7021.18	7021.18	7021.18	7021.18	7021.18	7026.75	7021.18	7026.75	295.142	8362.42	8362.42	8362.42	8362.42	8362.42	8377.85	8362.42	8377.85	295.359	9069.94	9069.94	9069.94	9069.94	9069.94	9069.94	9069.94	9069.94
294.765	6934.94	6934.94	6934.94	6934.94	6934.94	6940.9	6934.94	6940.9	295.042	8240.32	8240.32	8240.32	8240.32	8240.32	8256.74	8240.32	8256.74	295.259	9187.44	9187.44	9187.44	9187.44	9187.44	9187.44	9187.44	9187.44
294.665	6854.58	6854.58	6854.58	6854.58	6854.58	6860.96	6854.58	6860.96	294.942	8256.24	8256.24	8256.24	8256.24	8256.24	8273.72	8256.24	8273.72	295.159	9068	9068	9068	9068	9068	9068	9068	9068
294.565	6618.8	6618.8	6618.8	6618.8	6618.8	6625.65	6618.8	6625.65	294.842	8236.04	8236.04	8236.04	8236.04	8236.04	8254.68	8236.04	8254.68	295.059	9188.02	9188.02	9188.02	9188.02	9188.02	9188.02	9188.02	9188.02
294.465	6618.66	6618.66	6618.66	6618.66	6618.66	6626.02	6618.66	6626.02	294.742	8225.54	8225.54	8225.54	8225.54	8225.54	8245.45	8225.54	8245.45	294.959	9040.6	9040.6	9040.6	9040.6	9040.6	9040.6	9040.6	9040.6
294.365	6666.46	6666.46	6666.46	6666.46	6666.46	6674.39	6666.46	6674.39	294.642	8138.56	8138.56	8138.56	8138.56	8138.56	8159.86	8138.56	8159.86	294.859	9054.88	9054.88	9054.88	9054.88	9054.88	9054.88	9054.88	9054.88
294.265	6530.84	6530.84	6530.84	6530.84	6530.84	6539.4	6530.84	6539.4	294.542	8245.92	8245.92	8245.92	8245.92	8245.92	8268.74	8245.92	8268.74	294.759	8901.34	8901.34	8901.34	8901.34	8901.34	8901.34	8901.34	8901.34
294.165	6354.24	6354.24	6354.24	6354.24	6354.24	6363.49	6354.24	6363.49	294.442	8005.12	8005.12	8005.12	8005.12	8005.12	8029.61	8005.12	8029.61	294.659	8852	8852	8852	8852	8852	8852	8852	8852
294.065	6406.04	6406.04	6406.04	6406.04	6406.04	6416.06	6406.04	6416.06	294.342	8449.6	8449.6	8449.6	8449.6	8449.6	8475.93	8449.6	8475.93	294.559	9021.34	9021.34	9021.34	9021.34	9021.34	9021.34	9021.34	9021.34
293.965	6317.04	6317.04	6317.04	6317.04	6317.04	6327.93	6317.04	6327.93	294.242	8100.14	8220.34	8220.34	8220.34	8220.34	8248.7	8220.34	8248.7	294.459	8888.98	8888.98	8888.98	8888.98	8888.98	8888.98	8888.98	8888.98
293.865	6178.16	6178.16	6178.16	6178.16	6178.16	6190.01	6178.16	6190.01	294.142	8111.28	8190.18	8190.18	8190.18	8190.18	8220.79	8190.18	8220.79	294.359	8881.46	8881.46	8881.46	8881.46	8881.46	8881.47	8881.46	8881.47
293.765	6187.74	6187.74	6187.74	6187.74	6187.74	6200.68	6187.74	6200.68	294.042	8192.22	8159.47	8159.47	8159.47	8159.47	8192.57	8159.47	8192.57	294.259	9069.2	9027	9027	9027	9027	9027.01	9027	9027.01
293.665	6136.82	6136.82	6136.82	6136.82	6136.82	6150.98	6136.82	6150.98	293.942	8177.18	8128.21	8128.21	8128.21	8128.21	8164.09	8128.21	8164.09	294.159	9130.34	8990.51	8990.51	8990.51	8990.51	8990.53	8990.51	8990.53
293.565	6170.54	6170.54	6170.54	6170.54	6170.54	6186.08	6170.54	6186.08	293.842	8142.26	8096.41	8096.41	8096.41	8096.41	8135.39	8096.41	8135.39	294.059	9095.3	8953.38	8953.38	8953.38	8953.38	8953.42	8953.38	8953.42
293.465	6002.4	6002.4	6002.4	6002.4	6002.4	6019.52	6002.4	6019.52	293.742	7895.52	8064.05	8064.05	8064.05	8064.06	8106.52	8064.05	8106.52	293.959	9115.28	8915.6	8915.6	8915.6	8915.6	8915.68	8915.6	8915.68
293.365	6044.16	6044.16	6044.16	6044.16	6044.16	6063.07	6044.16	6063.08	293.642	8012.76	8031.14	8031.14	8031.14	8031.15	8077.52	8031.14	8077.52	293.859	8872.58	8877.18	8877.18	8877.18	8877.18	8877.31	8877.18	8877.31
293.265	5834.84	5834.84	5834.84	5834.84	5834.85	5855.82	5834.84	5855.82	293.542	8245.96	7997.68	7997.68	7997.68	7997.69	8048.48	7997.68	8048.48	293.759	9062.3	8838.1	8838.1	8838.1	8838.1	8838.33	8838.1	8838.33
293.165	5757.52	5831	5831	5831	5831.01	5854.36	5831	5854.37	293.442	8164.76	7963.67	7963.67	7963.67	7963.69	8019.49	7963.67	8019.5	293.659	9152.78	8798.38	8798.38	8798.38	8798.38	8798.77	8798.38	8798.77
293.065	5900.64	5822.9	5822.9	5822.9	5822.93	5849.03	5822.9	5849.06	293.342	8193.52	7929.11	7929.11	7929.11	7929.14	7990.65	7929.11	7990.68	293.559	9105.3	8758	8758	8758	8758.01	8758.67	8758	8758.68
292.965	5717.52	5814.63	5814.63	5814.63	5814.67	5844	5814.63	5844.04	293.242	8167.24	7894.02	7894.02	7894.02	7894.06	7962.11	7894.02	7962.15	293.459	8996.14	8716.98	8716.98	8716.98	8716.99	8718.12	8716.98	8718.13
292.865	5838.72	5806.18	5806.18	5806.18	5806.25	5839.36	5806.18	5839.43	293.142	8063.9	7858.37	7858.37	7858.37	7858.44	7934.02	7858.37	7934.08	293.359	9111.66	8675.31	8675.31	8675.31	8675.32	8677.2	8675.31	8677.21
292.765	5735.48	5797.56	5797.56	5797.56	5797.67	5835.27	5797.56	5835.38	293.042	8217.94	7822.18	7822.18	7822.18	7822.28	7906.6	7822.18	7906.7	293.259	9096.42	8632.99	8632.99	8632.99	8633.01	8636.11	8632.99	8636.13
292.665	5531.74	5788.76	5788.76	5788.76	5788.93	5831.91	5788.76	5832.09	292.942	8110.66	7785.45	7785.45	7785.45	7785.61	7880.1	7785.45	7880.26	293.159	9110.36	8590.02	8590.02	8590.02	8590.06	8595.08	8590.02	8595.12
292.565	5568.48	5779.77	5779.77	5779.77	5780.07	5829.53	5779.77	5829.82	292.842	8143.54	7748.19	7748.19	7748.19	7748.43	7854.88	7748.19	7855.12	293.059	9064.3	8546.42	8546.42	8546.42	8546.47	8554.51	8546.42	8554.57
292.465	5607.36	5770.61	5770.61	5770.61	5771.09	5828.47	5770.61	5828.94	292.742	8061.08	7710.38	7710.38	7710.38	7710.75	7831.39	7710.38	7831.77	292.959	9111	8502.16	8502.16	8502.16	8502.25	8515	8502.16	8515.09
292.365	5744.64	5761.28	5761.28	5761.28	5762.02	5829.25	5761.28	5830	292.642	8056.46	7672.03	7672.03	7672.03	7672.61	7810.22	7672.03	7810.8	292.859	9076.3	8457.26	8457.26	8457.26	8457.4	8477.26	8457.26	8477.41
292.265	5645.66	5751.77	5751.77	5751.77	5752.94	5832.58	5751.77	5833.75	292.542	7966.66	7633.15	7633.15	7633.15	7634.02	7792.19	7633.15	7793.06	292.759	9317.78	8411.72	8411.72	8411.72	8411.94	8442.64	8411.72	8442.86
292.165	5525.96	5742.08	5742.08	5742.08	5743.9	5839.51	5742.08	5841.33	292.442	8055.94	7593.74	7593.74	7593.74	7595.04	7778.46	7593.74	7779.76	292.659	9252.52	8365.55	8365.55	8365.55	8365.89	8412.61	8365.55	8412.95
292.065	5674.78	5732.21	5732.21	5732.21	5735.02	5851.6	5732.21	5854.4	292.342	8427.22	7553.79	7553.79	7553.79	7555.73	7770.59	7553.79	7772.53	292.559	9286.52	8318.74	8318.74	8318.74	8319.26	8389.39	8318.74	8389.91
291.965	5759.28	5722.17	5722.17	5722.17	5726.45	5871.13	5722.17	5875.41	292.242	8279.62	7513.33	7513.33	7513.33	7516.2	7770.76	7513.33	7773.63	292.459	9364.9	8271.31	8271.31	8271.31	8272.1	8376.33	8271.31	8377.11
291.865	5871.3	5711.95	5711.95	5711.95	5718.42	5901.47	5711.95	5907.93	292.142	8353.46	7472.35	7472.35	7472.35	7476.55	7782.03	7472.35	7786.23	292.359	9367.6	8223.26	8223.26	8223.26	8224.44	8376.79	8223.26	8377.97
291.765	5642.7	5701.56	5701.56	5701.56	5711.25	5947.45	5701.56	5957.14	292.042	8418.62	7430.87	7430.87	7430.87	7436.98	7808.62	7430.87	7814.72	292.259	9409.08	8174.59	8174.59	8174.59	8176.34	8396.91	8174.59	8398.66
291.665	6019.64	5691	5691	5691	5705.35	6016.03	5691	6030.38	291.942	8593.94	7388.88	7388.88	7388.88	7397.69	7856.21	7388.88	7865.03	292.159	9480.88	8125.3	8125.3	8125.3	8127.89	8442.59	8125.3	8445.18
291.565	6096.12	5680.27	5680.27	5680.27	5701.3	6116.73	5680.27	6137.77	291.842	8880.58	7346.4	7346.4	7346.4	7359.01	7932.75	7346.4	7945.36	292.059	9542.26	8075.41	8075.41	8075.41	8079.2	8521.95	8075.41	8525.74
291.465	6165.2	5669.36	5669.36	5669.36	5699.88	6262.42	5669.36	6292.94	291.742	8725.04	7303.44	7303.44	7303.44	7321.32	8049.24	7303.44	8067.13	291.959	9486.3	8024.91	8024.91	8024.91	8030.41	8646.63	8024.91	8652.12
291.365	6597.48	5658.29	5658.29	5658.29	5702.1	6468.7	5658.29	6512.51	291.642	8724.06	7259.99	7259.99	7259.99	7285.16	8219.2	7259.99	8244.37	291.859	9742.46	7973.82	7973.82	7973.82	7981.72	8825.9	7973.82	8833.8
291.265	6920.78	5647.06	5647.06	5647.06	5709.3	6753.71	5647.06	6815.95	291.542	8981	7216.07	7216.07	7216.07	7251.18	8460	7216.07	8495.11	291.759	9747.96	7922.14	7922.14	7922.14	7933.4	9076.64	7922.14	9087.9
291.165	7322.04	5635.67	5635.67	5635.67	5723.19	7136.48	5635.67	7224	291.442	9271.54	7171.69	7171.69	7171.69	7220.24	8793.61	7171.69	8842.17	291.659	10282.9	7869.88	7869.88	7869.88	7885.8	9411.8	7869.88	9427.72
291.065	7792.44	5624.12	5624.12	5624.12	5746.06	7634.3	5624.12	7756.24	291.342	9607.46	7126.86	7126.86	7126.86	7193.45	9244.01	7126.86	9310.6	291.559	10447.9	7817.06	7817.06	7817.06	7839.38	9846.59	7817.06	9868.92
290.965	8461.38	5612.43	5612.43	5612.43	5780.8	8258.62	5612.43	8426.99	291.242	10152.2	7081.6	7081.6	7081.6	7172.17	9837.11	7081.6	9927.68	291.459	10874.8	7763.7	7763.7	7763.7	7794.73	10401.6	7763.7	10432.7
290.865	9466.86	5600.59	5600.59	5600.59	5830.62	9009.1	5600.59	9239.14	291.142	10953.8	7035.93	7035.93	7035.93	7158.07	10599.5	7035.93	10721.7	291.359	11249.8	7709.82	7709.82	7709.82	7752.6	11084.5	7709.82	11127.2
290.765	10298.5	5588.62	5588.62	5588.62	5899.59	9870.36	5588.62	10181.3	291.042	11776.9	6989.89	6989.89	6989.89	7153.23	11553.9	6989.89	11717.2	291.259	11983.8	7655.43	7655.43	7655.43	7714.03	11912.4	7655.43	11971
290.665	11110.6	5576.52	5576.52	5576.52	5992.47	10808.2	5576.52	11224.1	290.942	12856.1	6943.5	6943.5	6943.5	7160.11	12712.9	6943.5	12929.5	291.159	12642.2	7600.57	7600.57	7600.57	7680.17	12887	7600.57	12966.6
290.565	12230.6	5564.31	5564.31	5564.31	6114.81	11769	5564.31	12319.5	290.842	14437.3	6896.8	6896.8	6896.8	7181.64	14077.6	6896.8	14362.5	291.059	13475.1	7545.28	7545.28	7545.28	7652.47	14003.8	7545.28	14111
290.465	13643.1	5551.99	5551.99	5552	6272.86	12682.8	5551.99	13403.6	290.742	15710.7	6849.86	6849.86	6849.86	7221.69	15632.5	6849.86	16004.4	290.959	14780	7489.59	7489.59	7489.59	7632.72	15254.7	7489.59	15397.8
290.365	14189.1	5539.58	5539.58	5539.59	6473.47	13471.7	5539.58	14405.6	290.642	17418.9	6802.71	6802.71	6802.71	7283.96	17336.9	6802.71	17818.1	290.859	16136.8	7433.55	7433.55	7433.55	7623.05	16605.4	7433.55	16794.9
290.265	15159.2	5527.09	5527.09	5527.09	6724.13	14060.4	5527.09	15257.4	290.542	19556.6	6755.43	6755.43	6755.43	7372.85	19129	6755.43	19746.5	290.759	17649.7	7377.23	7377.23	7377.23	7625.98	18017.7	7377.23	18266.4
290.165	15674.9	5514.51	5514.51	5514.53	7033.55	14387.5	5514.51	15906.6	290.442	21670.4	6708.07	6708.07	6708.08	7493.28	20925.3	6708.07	21710.5	290.659	19327.8	7320.68	7320.68	7320.68	7644.43	19433.1	7320.68	19756.9
290.065	16298	5501.87	5501.87	5501.9	7407.57	14415.9	5501.87	16321.6	290.342	23258.6	6660.73	6660.73	6660.74	7650.47	22624.8	6660.73	23614.5	290.559	20992.6	7263.99	7263.99	7263.99	7681.72	20784.7	7263.99	21202.4
289.965	16634.5	5489.16	5489.16	5489.21	7852.28	14142.3	5489.16	16505.5	290.242	25498.8	6613.45	6613.45	6613.47	7849.82	24119.8	6613.45	25356.2	290.459	22627.8	7207.21	7207.21	7207.22	7741.55	21988.2	7207.21	22522.6
289.865	16522.3	5476.39	5476.39	5476.49	8372.08	13594.8	5476.39	16490.6	290.142	26815.8	6566.31	6566.31	6566.35	8096.75	25303.8	6566.31	26834.3	290.359	24102.6	7150.43	7150.43	7150.44	7827.97	22975.8	7150.43	23653.4
289.765	16566.8	5463.56	5463.56	5463.75	8968.84	12828.3	5463.56	16333.8	290.042	27724.2	6519.37	6519.37	6519.43	8396.32	26085.7	6519.37	27962.7	290.259	25298.2	7093.69	7093.69	7093.71	7945.26	23667.3	7093.69	24518.9
289.665	16123.4	5450.68	5450.68	5451.02	9641	11915.2	5450.68	16105.8	289.942	29226.6	6472.65	6472.65	6472.77	8752.9	26404.3	6472.65	28684.7	290.159	25901.6	7037.07	7037.07	7037.1	8097.8	24012.2	7037.07	25073
289.565	15968.3	5437.74	5437.74	5438.35	10382.6	10934.5	5437.74	15880	289.842	29690	6426.22	6426.22	6426.44	9169.78	26231	6426.22	28974.8	290.059	25809.6	6980.58	6980.58	6980.65	8289.89	23988.8	6980.58	25298.2
289.465	16095.5	5424.75	5424.75	5425.81	11182.4	9959.24	5424.75	15717.9	289.742	29111	6380.09	6380.09	6380.48	9648.57	25571.5	6380.09	28840.4	289.959	25241.8	6924.23	6924.23	6924.35	8526.38	23573.2	6924.23	25175.4
289.365	15553.2	5411.7	5411.7	5413.55	12023.8	9047.71	5411.7	15661.6	289.642	28403.8	6334.26	6334.26	6334.95	10188.7	24478.2	6334.26	28333.3	289.859	24771	6868.01	6868.01	6868.23	8809.9	22815.3	6868.01	24757.4
289.265	15298.7	5398.6	5398.6	5401.74	12882	8239.64	5398.6	15726.2	289.542	26972.2	6288.71	6288.71	6289.92	10786.7	23029	6288.71	27528.2	289.759	23912	6811.92	6811.92	6812.31	9142.59	21753.2	6811.92	24084.2
289.165	15635.7	5385.44	5385.44	5390.7	13727.8	7556.01	5385.44	15903.6	289.442	26254.6	6243.4	6243.4	6245.49	11436.8	21321.5	6243.4	26517	289.659	22410.4	6755.91	6755.92	6756.6	9525.18	20458.8	6755.91	23228.8
289.065	16011.6	5372.24	5372.24	5380.96	14527.7	6999.79	5372.24	16163.9	289.342	25029.6	6198.32	6198.33	6201.87	12127.1	19465.9	6198.32	25398.2	289.559	21849.8	6699.96	6699.96	6701.14	9956.48	19013.4	6699.96	22271.1
288.965	16359.5	5358.98	5358.98	5373.16	15245.8	6562.37	5358.98	16463.4	289.242	23529.2	6153.45	6153.45	6159.37	12843	17567.9	6153.45	24263.3	289.459	20897	6644.05	6644.05	6646.06	10433	17488.9	6644.05	21279.9
288.865	16685.3	5345.69	5345.69	5368.55	15846.5	6227.89	5345.69	16751.5	289.142	23517.6	6108.74	6108.74	6118.48	13565.7	15719.9	6108.74	23186.6	289.359	20044.4	6588.14	6588.15	6591.5	10948.2	15960.2	6588.14	20323.7
288.765	17050.3	5332.37	5332.37	5368.46	16297.2	5977.75	5332.37	16978.7	289.042	22404.6	6064.19	6064.2	6079.96	14273.3	13995.8	6064.19	22220.7	289.259	19555.5	6532.22	6532.24	6537.79	11492.9	14485.5	6532.22	19451.8
288.665	17419	5319.02	5319.02	5375.43	16571.9	5793.11	5319.02	17102.4	288.942	21830.4	6019.79	6019.81	6045.06	14941	12444.6	6019.79	21391.1	289.159	18777.5	6476.28	6476.31	6485.34	12054.3	13109.5	6476.28	18696.6
288.565	17384.7	5305.64	5305.65	5392.31	16650.2	5657.35	5305.64	17088.5	288.842	21204.2	5975.53	5975.55	6015.19	15542.5	11093.7	5975.53	20700.3	289.059	18252.8	6420.29	6420.35	6434.84	12616.6	11857.5	6420.29	18068.5
288.465	17147.1	5292.25	5292.25	5423.51	16527.9	5557.04	5292.25	16924	288.742	20467.4	5931.38	5931.43	5993.09	16051.8	9952.28	5931.38	20134.4	288.959	18371.4	6364.26	6364.36	6387.27	13161.4	10755	6364.26	17575.2
288.365	16717.8	5278.83	5278.85	5474.89	16213.6	5481.81	5278.83	16612.6	288.642	19754	5887.35	5887.44	5981.58	16444.8	9010.05	5887.35	19661.8	288.859	17640.5	6308.19	6308.36	6343.98	13668.3	9796.44	6308.19	17192.5
288.265	16382.4	5265.4	5265.43	5553.28	15724.8	5424.14	5265.4	16171.5	288.542	19431.3	5843.41	5843.58	5985.45	16701.6	8248.36	5843.41	19248.8	288.759	17283.7	6252.06	6252.37	6307.12	14115.9	8982.63	6252.06	16901.9
288.165	15483.6	5251.94	5252.01	5669.72	15088.1	5378.52	5251.94	15632.6	288.442	18997.6	5799.56	5799.88	6010.46	16807.7	7643.83	5799.56	18863.2	288.659	16949.3	6195.88	6196.42	6278.94	14481.6	8303.49	6195.88	16672.8
288.065	14766.6	5238.46	5238.6	5833.71	14336.3	5341.26	5238.46	15034.5	288.342	18250.6	5755.8	5756.4	6063.97	16755.6	7169.12	5755.8	18477.7	288.559	16423.2	6139.63	6140.57	6263.76	14747.7	7740.83	6139.63	16473.9
287.965	14184.1	5224.96	5225.23	6063.08	13505.2	5309.85	5224.96	14428.5	288.242	17653.6	5712.12	5713.2	6156.66	16545.7	6798.43	5712.12	18077.6	288.459	16149.1	6083.32	6084.93	6265.4	14899.3	7286.03	6083.32	16285.7
287.865	13972.8	5211.42	5211.99	6371	12630.5	5282.57	5211.42	13861.8	288.142	16939.4	5668.5	5670.43	6298.29	16183	6509.28	5668.5	17655.5	288.359	15630.3	6026.94	6029.65	6290.59	14926.6	6916.62	6026.94	16082.7
287.765	13234.9	5197.85	5198.99	6779	11745.8	5258.24	5197.85	13388.4	288.042	16640.7	5624.94	5628.34	6506.89	15686.2	6282.44	5624.94	17229.1	288.259	15055.3	5970.48	5974.97	6346.26	14825.6	6619.89	5970.48	15855.3
287.665	12706.5	5184.26	5186.5	7305.74	10880.7	5236.05	5184.26	13056.2	287.942	16218.6	5581.42	5587.31	6794.35	15076.1	6101.91	5581.42	16815.4	288.159	14978.2	5913.93	5921.35	6441.25	14598.4	6382.25	5913.93	15601.5
287.565	12390.8	5170.63	5174.94	7970.02	10058	5215.45	5170.63	12906.5	287.842	15795	5537.96	5548.08	7182.79	14376.9	5955.67	5537.96	16449.6	288.059	14992.4	5857.31	5869.34	6586.87	14253.4	6189.68	5857.31	15327.4
287.465	12731.1	5156.97	5165.12	8793.08	9294.47	5196.06	5156.97	12977.8	287.742	15948.9	5494.54	5511.56	7687.86	13615	5834.75	5494.54	16165.5	287.959	14826.8	5800.61	5819.83	6792.47	13804.1	6034.34	5800.61	15048.9
287.365	13412.8	5143.28	5158.37	9780.22	8600.92	5177.61	5143.28	13287.3	287.642	16136.1	5451.18	5479.49	8328.53	12816.3	5732.15	5451.18	16002.9	287.859	14443.8	5743.86	5774.4	7074.21	13268.2	5905.72	5743.86	14790.9
287.265	14205.7	5129.57	5156.98	10946.1	7983.01	5159.91	5129.57	13857.3	287.542	16459.6	5407.9	5454.24	9121.06	12005.4	5643.02	5407.89	16000.1	287.759	14679.7	5687.05	5734.81	7439.29	12665.8	5797.67	5687.05	14576.4
287.165	15247.2	5115.86	5164.69	12271.6	7442.1	5142.82	5115.86	14673.6	287.442	16797.3	5364.71	5439.34	10070.2	11204	5563.96	5364.7	16183.4	287.659	14644.1	5630.19	5703.73	7902.9	12018.2	5704.98	5630.19	14439.2
287.065	16287	5102.15	5187.61	13740.2	6976.13	5126.22	5102.15	15723.7	287.342	17103	5321.64	5440.48	11183.2	10430.1	5492.37	5321.63	16581.3	287.559	14701.9	5573.3	5685.9	8468.49	11346.3	5623.02	5573.3	14403.8
286.965	17353.1	5088.45	5235.29	15304.5	6580.84	5110.05	5088.45	16965.3	287.242	18389.5	5278.71	5464.23	12438.9	9697.79	5426.41	5278.69	17191.3	287.459	15122.1	5516.39	5686.11	9139.93	10669.4	5549.19	5516.39	14495.5
286.865	18560.9	5074.79	5322.19	16903.8	6251.09	5094.23	5074.79	18346.9	287.142	18792.1	5235.97	5523.15	13816.1	9017.3	5364.82	5235.94	18013.6	287.359	15334.7	5459.49	5711.54	9911.26	10004.9	5480.79	5459.49	14730
286.765	20092.2	5061.16	5470.01	18455.3	5978.18	5078.74	5061.16	19798.7	287.042	19625.6	5193.46	5629.38	15262.6	8395.07	5306.67	5193.39	19013.7	287.259	15475.1	5402.63	5774.44	10765.4	9366.46	5416.27	5402.63	15114.7
286.665	21211.2	5047.6	5710.26	19869.4	5754.75	5063.55	5047.6	21255.2	286.942	20676	5151.21	5805.22	16715.8	7834.3	5251.3	5151.09	20153.4	287.159	16182.7	5345.82	5885.95	11677.2	8764.48	5354.47	5345.81	15644.7
286.565	22415	5034.1	6087.51	21037.4	5573.59	5048.61	5034.1	22644.8	286.842	21402.4	5109.29	6074.47	18093.4	7336.64	5198.21	5109.07	21375.7	287.059	16799.1	5289.09	6062.81	12605.9	8206.17	5294.48	5289.09	16302.1
286.465	23531.4	5020.68	6663.04	21885.1	5427.88	5033.94	5020.68	23947.9	286.742	22662	5067.76	6471.2	19308.8	6899.01	5147.09	5067.38	22624.3	286.959	17047.6	5232.5	6331.66	13500.1	7695.86	5235.83	5232.49	17066
286.365	24636.6	5007.36	7518.47	22321.6	5311.45	5019.5	5007.36	25148.9	286.642	22998.6	5026.7	7039.01	20263.6	6518.05	5097.66	5026.06	23840.8	286.859	17631.1	5176.05	6714.54	14304.5	7235.38	5178.08	5176.05	17904.3
286.265	25775.8	4994.15	8758.92	22327.2	5218.83	5005.29	4994.15	26327.8	286.542	24226.4	4986.21	7822.55	20894.6	6189.3	5049.71	4985.13	25001.8	286.759	18530.9	5119.8	7244.33	14956	6824.5	5121	5119.78	18786.5
286.165	27437.8	4981.06	10514.6	21888.3	5145.31	4991.31	4981.06	27596.4	286.442	24791	4946.45	8894.15	21122.1	5907.74	5003.11	4944.63	26095	286.659	19106.5	5063.78	7969	15402	6461.42	5064.47	5063.74	19705.7
286.065	29004	4968.1	12940	21045.9	5087.19	4977.56	4968.1	29146.4	286.342	26473.2	4907.58	10303.8	20947.4	5668.06	4957.75	4904.61	27166.1	286.559	20252.2	5008.05	8923.29	15602.7	6143.18	5008.4	5007.98	20653.7
285.965	30922	4955.3	16207.8	19870.7	5040.77	4964.04	4955.3	31217.4	286.242	27730.8	4869.94	12146.7	20364.7	5464.96	4913.55	4865.11	28299.5	286.459	21009.2	4952.67	10158.8	15530	5866.06	4952.78	4952.53	21650.2
285.865	34250.6	4942.67	20497.7	18445.1	5003.39	4950.77	4942.67	34068.9	286.142	29400.8	4833.9	14475.9	19430.2	5293.4	4870.49	4826.2	29599.1	286.359	22158.6	4897.74	11742.5	15196.4	5625.94	4897.59	4897.45	22770.3
285.765	38453.4	4930.24	25976.8	16875.1	4972.93	4937.76	4930.24	37971.9	286.042	31310.6	4800.09	17373	18212.8	5148.66	4828.53	4787.92	31211.5	286.259	23990.6	4843.35	13711.1	14610.7	5418.52	4842.87	4842.79	24055.4
285.665	43883	4918.06	32780.8	15250.1	4947.76	4925.04	4918.06	43149.6	285.942	33682.8	4769.27	20885.5	16798.7	5026.5	4787.69	4750.36	33266.3	286.159	25962.8	4789.72	16120.2	13830.9	5239.62	4788.68	4788.64	25614.6
285.565	50053.2	4906.16	40942.1	13654.5	4926.61	4912.67	4906.16	49717.5	285.842	36686.8	4742.63	25031.1	15282.6	4923.16	4747.99	4713.59	35873.1	286.059	28001.4	4737.13	19026.7	12903.4	5085.64	4735.1	4735.08	27547.6
285.465	58565.6	4894.61	50378.5	12153.8	4908.53	4900.68	4894.61	57657.7	285.742	40044.2	4721.72	29810.6	13747.3	4835.41	4709.49	4677.72	39113.7	285.959	30352.8	4686.01	22432.8	11892.9	4952.39	4682.21	4682.2	29917.6
285.365	67165.2	4883.48	60840.6	10790.6	4892.85	4889.14	4883.47	66762.8	285.642	44143	4708.53	35125.4	12263.2	4760.52	4672.27	4642.86	42958.5	285.859	32886.4	4637.04	26349.2	10855.2	4836.58	4630.11	4630.1	32787.7
285.265	76359.4	4872.86	71882.8	9590.42	4879.09	4878.29	4872.81	76612.2	285.542	48396.8	4706.07	40864.8	10887	4696.33	4636.43	4609.15	47354.1	285.759	36667.2	4591.3	30754.2	9840.57	4735.35	4578.9	4578.9	36184.8
285.165	85870.4	4862.84	82860.5	8565.31	4866.89	4867.84	4862.73	86572.4	285.442	52770	4717.41	46793.1	9649.28	4640.8	4602.09	4576.74	52095.7	285.659	40533.8	4550.47	35555.6	8885.62	4646.29	4528.74	4528.74	40051.7
285.065	94799.2	4853.56	92969.1	7706.47	4856.02	4858.05	4853.29	95830	285.342	56587.4	4747.89	52633.9	8570.43	4592.44	4569.37	4545.76	56931	285.559	45038.8	4517.13	40642.8	8020.3	4567.37	4479.79	4479.79	44308.2
284.965	102984	4845.21	101332	7010.52	4846.35	4848.98	4844.58	103504	285.242	61267.4	4801.73	58049.2	7654.41	4550.08	4538.36	4516.35	61528.4	285.459	49103.4	4495.16	45845.1	7254.13	4496.93	4432.23	4432.23	48794.7
284.865	108282	4838.08	107127	6451.39	4837.79	4840.83	4836.66	108749	285.142	64938.6	4887.57	62680	6892.27	4512.83	4509.22	4488.66	65527.3	285.359	52573.8	4490.25	50946.8	6598.02	4433.62	4386.22	4386.22	53310
284.765	111330	4832.68	109738	6016.6	4830.3	4833.54	4829.57	110933	285.042	67961.2	5010.98	66159.6	6276.18	4479.98	4482.05	4462.81	68557.5	285.259	57047.2	4510.64	55695.5	6044.5	4376.34	4341.92	4341.92	57601.2
284.665	109927	4829.88	108870	5681.33	4823.81	4827.11	4823.36	109739	284.942	69013	5183.14	68251.4	5782.41	4451.01	4456.94	4438.9	70369.2	285.159	60855.4	4568.06	59814.1	5589.08	4324.28	4299.48	4299.48	61397
284.565	106026	4831.18	104619	5429.01	4818.28	4821.54	4817.99	105247	284.842	69421.2	5411.47	68695.7	5399.3	4425.44	4433.9	4416.98	70697.9	285.059	63809	4678.24	63073.4	5220.16	4276.79	4259.09	4259.09	64471.3
284.465	98451.4	4839.16	97448	5242.18	4813.63	4816.79	4813.46	97905.9	284.742	69404	5707.59	67545.4	5102.8	4402.92	4412.96	4397.06	69583.4	284.959	66077.6	4862.2	65227.8	4925.24	4233.38	4220.84	4220.84	66586.1
284.365	89692.8	4857.95	88086.8	5105.54	4809.79	4812.81	4809.68	88434.1	284.642	67536	6079.7	64814.3	4879.15	4383.17	4394.11	4379.15	67033.9	284.859	67645.2	5146.83	66117.3	4693.98	4193.65	4184.85	4184.85	67597.2
284.265	77156	4893.9	77413.2	5008.32	4806.67	4809.56	4806.6	77705.2	284.542	63491.8	6535.84	60790.8	4711.94	4365.93	4377.28	4363.19	63329	284.759	67999.4	5565.28	65716	4512.54	4157.31	4151.17	4151.17	67497.7
284.165	65924.2	4956.18	66293.4	4939.07	4804.15	4806.94	4804.11	66583.2	284.442	59438.2	7081.69	55757.7	4588.53	4350.91	4362.35	4349.06	58745	284.659	67000.8	6156.52	64007.9	4373.45	4124.08	4119.83	4119.83	66302.5
284.065	55202.2	5057.05	55458.8	4891.53	4802.15	4804.81	4802.12	55805.8	284.342	54682.6	7715.55	50083.7	4498.94	4337.87	4349.18	4336.64	53638.7	284.559	64658.2	6963.77	61121.1	4265.59	4093.72	4090.8	4090.8	64171.8
283.965	45432.8	5211.44	45454.6	4858.68	4800.56	4803.1	4800.54	45926.2	284.242	49458.4	8434.65	44126.2	4433.76	4326.6	4337.99	4325.77	48356.1	284.459	61883.2	8031.18	57277.8	4182.95	4065.99	4064.01	4064.01	61365.9
283.865	36839	5435.28	36624.3	4836.64	4799.3	4801.72	4799.3	37300.1	284.142	43573.6	9221.63	38205.6	4387.48	4316.85	4327.85	4316.31	43194.2	284.359	58474	9398.58	52690.1	4118.99	4040.68	4039.34	4039.34	58130.3
283.765	30018.2	5741.86	29127.5	4821.92	4798.32	4800.61	4798.31	30097	284.042	38200.8	10057.2	32567.2	4354.06	4308.42	4318.92	4308.06	38373.6	284.259	54820.4	11093.8	47637.4	4069.22	4017.58	4016.69	4016.69	54767.9
283.665	24394.6	6136.46	22978.2	4812.23	4797.53	4799.7	4797.53	24334	283.942	34078.8	10907.2	27419.2	4330.28	4301.1	4311.05	4300.87	34065.4	284.159	51409	13122.9	42383.1	4030.11	3996.5	3995.91	3995.91	51544.9
283.565	20344.4	6607.96	18088.1	4805.95	4796.91	4798.99	4796.91	19910.2	283.842	29762.2	11730.8	22844.6	4313.08	4294.75	4304.2	4294.6	30309	284.059	48049.4	15459.1	37156.2	3998.75	3977.28	3976.89	3976.89	48660.7
283.465	17023.5	7123.05	14308.5	4801.87	4796.42	4798.41	4796.42	16642.6	283.742	26379.6	12484.3	18913.6	4300.57	4289.21	4298.32	4289.12	27129.5	283.959	45406.6	18032.6	32149.2	3973.34	3959.75	3959.49	3959.49	46236.4
283.365	14582	7623.97	11463.7	4799.29	4796.03	4797.94	4796.03	14296.8	283.642	23879.6	13115	15613.3	4291.32	4284.38	4293.13	4284.32	24459.9	283.859	43656.8	20724.2	27494.3	3952.23	3943.81	3943.64	3943.64	44283.6
283.265	12457.9	8035.39	9375.33	4797.63	4795.72	4797.54	4795.72	12618.7	283.542	21587.4	13583.1	12906.8	4284.34	4280.17	4288.54	4280.14	22222.4	283.759	42261.6	23365.7	23303.1	3934.55	3929.37	3929.26	3929.26	42744.9
283.165	11196	8282.45	7878.47	4796.58	4795.47	4797.2	4795.47	11368.3	283.442	20286.8	13849.4	10744.7	4278.99	4276.51	4284.49	4276.49	20328.1	283.659	41303.6	25752.7	19612.9	3919.5	3916.38	3916.31	3916.31	41452.5
283.065	10308.1	8314.83	6829.97	4795.9	4795.27	4796.92	4795.27	10351.8	283.342	18681.3	13893.9	9037.34	4274.79	4273.35	4280.94	4273.34	18667	283.559	40540	27667.7	16426.7	3906.65	3904.8	3904.76	3904.76	40191.6
282.965	9068.28	8125.62	6113.41	4795.47	4795.12	4796.7	4795.12	9445.84	283.242	17620.3	13714.3	7734.56	4271.47	4270.64	4277.84	4270.63	17186.2	283.459	39606.8	28914.4	13752.8	3895.68	3894.59	3894.57	3894.57	38773.7
282.865	8475.44	7754.06	5632.99	4795.2	4795	4796.52	4795	8593.76	283.142	16468	13320.3	6741.97	4268.82	4268.35	4275.15	4268.35	15801.2	283.359	38079	29350.3	11538.5	3886.36	3885.73	3885.71	3885.71	37003.7
282.765	7943.98	7270.43	5317.43	4795.02	4794.92	4796.37	4794.92	7794.5	283.042	15118.3	12748.3	6010.15	4266.71	4266.44	4272.97	4266.44	14498.8	283.259	35645.4	28929.1	9731.84	3878.51	3878.15	3878.14	3878.14	34783.2
282.665	7348.48	6752.11	5114.45	4794.91	4794.85	4796.25	4794.85	7073.16	282.942	13507.8	12032.4	5473.88	4265.02	4264.88	4271.15	4264.87	13247.8	283.159	32428.6	27698.3	8298.52	3871.96	3871.76	3871.76	3871.76	32125.2
282.565	6591.22	6263.07	4986.56	4794.85	4794.81	4796.15	4794.81	6456.19	282.842	12088.8	11226.6	5089.71	4263.67	4263.6	4269.62	4263.59	12058.8	283.059	28650.8	25792.3	7169.02	3866.56	3866.45	3866.45	3866.45	29095
282.465	6095.16	5843.66	4907.64	4794.81	4794.79	4796.07	4794.79	5957.8	282.742	10963.4	10373.7	4819.16	4262.6	4262.56	4268.34	4262.56	10936.2	282.959	24997.4	23404.9	6290.25	3862.13	3862.07	3862.07	3862.07	25833.2
282.365	5751.1	5510.55	4859.92	4794.78	4794.78	4796	4794.78	5576.92	282.642	9846.88	9519.15	4630.32	4261.76	4261.73	4267.26	4261.73	9893.29	282.859	21442.8	20752.7	5626.32	3858.51	3858.48	3858.48	3858.48	22520.6
282.265	5313.06	5262.57	4831.65	4794.77	4794.77	4795.95	4794.77	5300.64	282.542	8497.7	8699.13	4502.56	4261.09	4261.08	4266.36	4261.08	8945.9	282.759	18465.5	18041.4	5125.19	3855.56	3855.55	3855.55	3855.55	19311
282.165	4985.96	5088.25	4815.24	4794.77	4794.77	4795.91	4794.77	5109.87	282.442	7661.78	7937.94	4415.68	4260.57	4260.56	4265.59	4260.56	8098.09	282.659	15818	15440.5	4751.61	3853.18	3853.17	3853.17	3853.17	16339
282.065	4869.54	4971.81	4805.92	4794.77	4794.77	4795.86	4794.77	4984.06	282.342	7218.38	7255.25	4358.88	4260.15	4260.15	4264.95	4260.15	7358.79	282.559	13320.9	13071.6	4481.76	3851.24	3851.23	3851.23	3851.23	13702.1
281.965	4708.94	4897.53	4800.72	4794.77	4794.77	4795.82	4794.77	4904.54	282.242	6487.28	6657.96	4321.49	4259.83	4259.83	4264.46	4259.83	6724.26	282.459	11634.5	11006.3	4285.94	3849.66	3849.66	3849.66	3849.66	11442.6
281.865	4579.44	4852.2	4797.88	4794.77	4794.77	4795.78	4794.77	4856.33	282.142	6108.08	6148.91	4297.62	4259.58	4259.58	4264.05	4259.58	6191.43	282.359	10021.6	9272.85	4145.68	3848.37	3848.37	3848.37	3848.37	9570.15
281.765	4541.92	4825.68	4796.36	4794.77	4794.77	4795.74	4794.77	4828.25	282.042	5691.42	5725.05	4282.49	4259.38	4259.38	4263.69	4259.38	5752.47	282.259	8882.8	7866.26	4048.57	3847.32	3847.32	3847.32	3847.32	8067.51
281.665	4375.84	4810.8	4795.57	4794.77	4794.77	4795.7	4794.77	4812.55	281.942	5268.32	5378.29	4273.04	4259.23	4259.23	4263.38	4259.23	5396.24	282.159	7777.86	6759.28	3980.65	3846.46	3846.46	3846.46	3846.46	6893.48
281.565	4269.32	4802.78	4795.16	4794.76	4794.76	4795.67	4794.76	4804.09	281.842	5165.24	5101.9	4267.28	4259.12	4259.12	4263.09	4259.12	5114.04	282.059	6998.44	5912.28	3933.86	3845.74	3845.74	3845.74	3845.74	6000.4
281.465	4225.2	4798.62	4794.96	4794.76	4794.76	4795.64	4794.76	4799.69	281.742	4851.04	4883.42	4263.75	4259.03	4259.03	4262.84	4259.03	4891.95	281.959	6506.44	5281.01	3902.66	3845.14	3845.14	3845.14	3845.14	5338.54
281.365	4061.6	4796.56	4794.86	4794.76	4794.76	4795.61	4794.76	4797.49	281.642	4784.98	4716.14	4261.67	4258.96	4258.96	4262.61	4258.96	4722.5	281.859	5998.36	4822.1	3881.61	3844.64	3844.64	3844.64	3844.64	4859.07
281.265	4178.5	4795.56	4794.81	4794.76	4794.76	4795.58	4794.76	4796.42	281.542	4535.62	4587.94	4260.43	4258.9	4258.9	4262.43	4258.9	4592.98	281.759	5537.94	4496.33	3867.62	3844.22	3844.22	3844.22	3844.22	4519.72
281.165	4119.76	4795.11	4794.78	4794.76	4794.76	4795.55	4794.76	4795.91	281.442	4621.98	4493.24	4259.71	4258.86	4258.86	4262.27	4258.86	4497.5	281.659	5018.72	4270.31	3858.59	3843.87	3843.87	3843.87	3843.87	4285.04
281.065	4170.68	4794.91	4794.77	4794.76	4794.76	4795.52	4794.76	4795.67	281.342	4418.5	4422.96	4259.29	4258.83	4258.83	4262.12	4258.83	4426.72	281.559	4982.26	4117.23	3852.67	3843.55	3843.55	3843.55	3843.55	4126.35
280.965	4164.36	4794.82	4794.77	4794.76	4794.76	4795.5	4794.76	4795.56	281.242	4396.02	4372.48	4259.05	4258.8	4258.8	4261.98	4258.8	4375.91	281.459	4836.96	4015.55	3848.85	3843.29	3843.29	3843.29	3843.29	4021.11
280.865	4219.14	4794.78	4794.76	4794.76	4794.76	4795.47	4794.76	4795.5	281.142	4325.36	4336.28	4258.91	4258.77	4258.77	4261.84	4258.77	4339.48	281.359	4744.62	3949.4	3846.43	3843.05	3843.05	3843.05	3843.05	3952.77
280.765	4302.06	4794.77	4794.76	4794.76	4794.76	4795.45	4794.76	4795.46	281.042	4435.36	4310.95	4258.82	4258.75	4258.75	4261.7	4258.75	4313.97	281.259	4416.6	3907.24	3844.87	3842.86	3842.86	3842.86	3842.86	3909.25
280.665	4287.88	4794.77	4794.76	4794.76	4794.76	4795.43	4794.76	4795.43	280.942	4261.48	4293.4	4258.77	4258.73	4258.73	4261.57	4258.73	4296.28	281.159	4508.94	3880.91	3843.86	3842.68	3842.68	3842.68	3842.68	3882.09
280.565	4242.62	4794.76	4794.76	4794.76	4794.76	4795.4	4794.76	4795.41	280.842	4348.26	4281.41	4258.73	4258.72	4258.72	4261.45	4258.72	4284.16	281.059	4386.18	3864.79	3843.22	3842.53	3842.53	3842.53	3842.53	3865.49
280.465	4419.88	4794.76	4794.76	4794.76	4794.76	4795.38	4794.76	4795.38	280.742	4420.22	4273.39	4258.71	4258.7	4258.7	4261.36	4258.7	4276.05	280.959	4366.08	3855.11	3842.8	3842.4	3842.4	3842.4	3842.4	3855.51
280.365	4397.6	4794.76	4794.76	4794.76	4794.76	4795.36	4794.76	4795.36	280.642	4279.96	4268.04	4258.7	4258.69	4258.69	4261.27	4258.69	4270.62	280.859	4244.26	3849.41	3842.51	3842.29	3842.29	3842.29	3842.29	3849.63
280.265	4534.24	4794.76	4794.76	4794.76	4794.76	4795.35	4794.76	4795.35	280.542	4348.92	4264.58	4258.69	4258.68	4258.68	4261.18	4258.68	4267.07	280.759	4295.5	3846.1	3842.32	3842.19	3842.19	3842.19	3842.19	3846.23
280.165	4604.6	4794.76	4794.76	4794.76	4794.76	4795.33	4794.76	4795.33	280.442	4376.48	4262.32	4258.68	4258.68	4258.68	4261.09	4258.68	4264.74	280.659	4264.14	3844.22	3842.18	3842.11	3842.11	3842.11	3842.11	3844.29
280.065	4627.12	4794.76	4794.76	4794.76	4794.76	4795.31	4794.76	4795.31	280.342	4223.82	4260.92	4258.68	4258.68	4258.68	4261.01	4258.68	4263.25	280.559	4310.78	3843.16	3842.09	3842.05	3842.05	3842.05	3842.05	3843.2
279.965	4828.6	4794.76	4794.76	4794.76	4794.76	4795.29	4794.76	4795.29	280.242	4276.18	4260.02	4258.68	4258.68	4258.68	4260.93	4258.68	4262.28	280.459	4160.56	3842.58	3842.02	3842	3842	3842	3842	3842.6
279.865	4928.56	4928.56	4928.56	4928.56	4928.56	4929.08	4928.56	4929.08	280.142	4303.06	4259.48	4258.67	4258.67	4258.67	4260.85	4258.67	4261.65	280.359	4096.64	3842.26	3841.98	3841.97	3841.97	3841.97	3841.97	3842.27
279.765	4765.38	4765.38	4765.38	4765.38	4765.38	4765.88	4765.38	4765.88	280.042	4168.18	4259.15	4258.67	4258.67	4258.67	4260.78	4258.67	4261.26	280.259	4165.98	3842.09	3841.95	3841.95	3841.95	3841.95	3841.95	3842.1
279.665	5011.28	5011.28	5011.28	5011.28	5011.28	5011.77	5011.28	5011.77	279.942	4198.44	4258.95	4258.67	4258.67	4258.67	4260.72	4258.67	4261	280.159	4036.82	3842.01	3841.94	3841.93	3841.93	3841.93	3841.93	3842.01
279.565	4928.58	4928.58	4928.58	4928.58	4928.58	4929.05	4928.58	4929.05	279.842	4251.62	4258.83	4258.67	4258.67	4258.67	4260.67	4258.67	4260.82	280.059	3917.34	3841.96	3841.93	3841.93	3841.93	3841.93	3841.93	3841.97
279.465	4971.2	4971.2	4971.2	4971.2	4971.2	4971.66	4971.2	4971.66	279.742	4325.96	4326.05	4325.96	4325.96	4325.96	4327.9	4325.96	4327.98	279.959	3832.28	3841.94	3841.93	3841.93	3841.93	3841.93	3841.93	3841.95
279.365	5122.48	5122.48	5122.48	5122.48	5122.48	5122.93	5122.48	5122.93	279.642	4241.86	4241.91	4241.86	4241.86	4241.86	4243.74	4241.86	4243.79	279.859	3883.86	3841.93	3841.93	3841.93	3841.93	3841.93	3841.93	3841.93
279.265	5150.7	5150.7	5150.7	5150.7	5150.7	5151.13	5150.7	5151.13	279.542	4363.78	4363.81	4363.78	4363.78	4363.78	4365.6	4363.78	4365.62	279.759	3809.64	3809.64	3809.64	3809.64	3809.64	3809.64	3809.64	3809.64
279.165	5224.4	5224.4	5224.4	5224.4	5224.4	5224.82	5224.4	5224.82	279.442	4364.36	4364.38	4364.36	4364.36	4364.36	4366.12	4364.36	4366.14	279.659	3895.2	3895.2	3895.2	3895.2	3895.2	3895.2	3895.2	3895.2
279.065	5165.74	5165.74	5165.74	5165.74	5165.74	5166.15	5165.74	5166.15	279.342	4284.46	4284.47	4284.46	4284.46	4284.46	4286.16	4284.46	4286.17	279.559	3827.44	3827.44	3827.44	3827.44	3827.44	3827.44	3827.44	3827.44
278.965	5212.56	5212.56	5212.56	5212.56	5212.56	5212.96	5212.56	5212.96	279.242	4160.38	4160.38	4160.38	4160.38	4160.38	4162.04	4160.38	4162.04	279.459	4016.64	4016.64	4016.64	4016.64	4016.64	4016.64	4016.64	4016.64
278.865	5158.76	5158.76	5158.76	5158.76	5158.76	5159.15	5158.76	5159.15	279.142	4116.8	4116.8	4116.8	4116.8	4116.8	4118.42	4116.8	4118.42	279.359	3966.8	3966.8	3966.8	3966.8	3966.8	3966.8	3966.8	3966.8
278.765	5048.5	5048.5	5048.5	5048.5	5048.5	5048.88	5048.5	5048.88	279.042	4172.5	4172.5	4172.5	4172.5	4172.5	4174.07	4172.5	4174.07	279.259	3825.36	3825.36	3825.36	3825.36	3825.36	3825.36	3825.36	3825.36
278.665	5047.38	5047.38	5047.38	5047.38	5047.38	5047.75	5047.38	5047.75	278.942	4137.56	4137.56	4137.56	4137.56	4137.56	4139.09	4137.56	4139.09	279.159	3733	3733	3733	3733	3733	3733	3733	3733
278.565	4977.58	4977.58	4977.58	4977.58	4977.58	4977.94	4977.58	4977.94	278.842	4345.04	4345.04	4345.04	4345.04	4345.04	4346.53	4345.04	4346.53	279.059	3953.54	3953.54	3953.54	3953.54	3953.54	3953.54	3953.54	3953.54
278.465	4906.5	4906.5	4906.5	4906.5	4906.5	4906.85	4906.5	4906.85	278.742	4165.92	4165.92	4165.92	4165.92	4165.92	4167.36	4165.92	4167.36	278.959	3661.48	3661.48	3661.48	3661.48	3661.48	3661.48	3661.48	3661.48
278.365	4834.56	4834.56	4834.56	4834.56	4834.56	4834.9	4834.56	4834.9	278.642	4078.68	4078.68	4078.68	4078.68	4078.68	4080.08	4078.68	4080.08	278.859	3659.84	3659.84	3659.84	3659.84	3659.84	3659.84	3659.84	3659.84
278.265	4642.14	4642.14	4642.14	4642.14	4642.14	4642.47	4642.14	4642.47	278.542	4127.5	4127.5	4127.5	4127.5	4127.5	4128.86	4127.5	4128.86	278.759	3811.46	3811.46	3811.46	3811.46	3811.46	3811.46	3811.46	3811.46
278.165	4539	4539	4539	4539	4539	4539.32	4539	4539.32	278.442	4095.86	4095.86	4095.86	4095.86	4095.86	4097.19	4095.86	4097.19	278.659	3672.9	3672.9	3672.9	3672.9	3672.9	3672.9	3672.9	3672.9
278.065	4459.46	4459.46	4459.46	4459.46	4459.46	4459.77	4459.46	4459.77	278.342	4003.92	4003.92	4003.92	4003.92	4003.92	4005.22	4003.92	4005.22	278.559	3855.48	3855.48	3855.48	3855.48	3855.48	3855.48	3855.48	3855.48
277.965	4339.96	4339.96	4339.96	4339.96	4339.96	4340.27	4339.96	4340.27	278.242	3963.46	3963.46	3963.46	3963.46	3963.46	3964.72	3963.46	3964.72	278.459	3836.76	3836.76	3836.76	3836.76	3836.76	3836.76	3836.76	3836.76
277.865	4427.06	4427.06	4427.06	4427.06	4427.06	4427.36	4427.06	4427.36	278.142	4116.68	4116.68	4116.68	4116.68	4116.68	4117.91	4116.68	4117.91	278.359	3735.88	3735.88	3735.88	3735.88	3735.88	3735.88	3735.88	3735.88
277.765	4276.66	4276.66	4276.66	4276.66	4276.66	4276.95	4276.66	4276.95	278.042	4135.9	4135.9	4135.9	4135.9	4135.9	4137.1	4135.9	4137.1	278.259	3725.32	3725.32	3725.32	3725.32	3725.32	3725.32	3725.32	3725.32
277.665	4190.38	4190.38	4190.38	4190.38	4190.38	4190.66	4190.38	4190.66	277.942	4063.48	4063.48	4063.48	4063.48	4063.48	4064.64	4063.48	4064.64	278.159	3643.94	3643.94	3643.94	3643.94	3643.94	3643.94	3643.94	3643.94
277.565	4174.1	4174.1	4174.1	4174.1	4174.1	4174.38	4174.1	4174.38	277.842	3899.02	3899.02	3899.02	3899.02	3899.02	3900.15	3899.02	3900.15	278.059	3722.76	3722.76	3722.76	3722.76	3722.76	3722.76	3722.76	3722.76
277.465	4042.08	4042.08	4042.08	4042.08	4042.08	4042.35	4042.08	4042.35	277.742	3955.88	3955.88	3955.88	3955.88	3955.88	3956.99	3955.88	3956.99	277.959	3653.54	3653.54	3653.54	3653.54	3653.54	3653.54	3653.54	3653.54
277.365	4096.72	4096.72	4096.72	4096.72	4096.72	4096.98	4096.72	4096.98	277.642	4049.78	4049.78	4049.78	4049.78	4049.78	4050.86	4049.78	4050.86	277.859	3694.42	3694.42	3694.42	3694.42	3694.42	3694.42	3694.42	3694.42
277.265	3775.26	3775.26	3775.26	3775.26	3775.26	3775.52	3775.26	3775.52	277.542	4058.3	4058.3	4058.3	4058.3	4058.3	4059.35	4058.3	4059.35	277.759	3667.34	3667.34	3667.34	3667.34	3667.34	3667.34	3667.34	3667.34
277.165	3822.56	3822.56	3822.56	3822.56	3822.56	3822.81	3822.56	3822.81	277.442	3988.4	3988.4	3988.4	3988.4	3988.4	3989.43	3988.4	3989.43	277.659	3670.5	3670.5	3670.5	3670.5	3670.5	3670.5	3670.5	3670.5
277.065	3645.5	3645.5	3645.5	3645.5	3645.5	3645.74	3645.5	3645.74	277.342	3826.3	3826.3	3826.3	3826.3	3826.3	3827.3	3826.3	3827.3	277.559	3688.48	3688.48	3688.48	3688.48	3688.48	3688.48	3688.48	3688.48
276.965	3632.16	3632.16	3632.16	3632.16	3632.16	3632.4	3632.16	3632.4	277.242	3927.48	3927.48	3927.48	3927.48	3927.48	3928.46	3927.48	3928.46	277.459	3690.42	3690.42	3690.42	3690.42	3690.42	3690.42	3690.42	3690.42
276.865	3611.48	3611.48	3611.48	3611.48	3611.48	3611.71	3611.48	3611.71	277.142	3784.32	3784.32	3784.32	3784.32	3784.32	3785.27	3784.32	3785.27	277.359	3671.82	3671.82	3671.82	3671.82	3671.82	3671.82	3671.82	3671.82
276.765	3472	3472	3472	3472	3472	3472.23	3472	3472.23	277.042	3837.44	3837.44	3837.44	3837.44	3837.44	3838.37	3837.44	3838.37	277.259	3619.54	3619.54	3619.54	3619.54	3619.54	3619.54	3619.54	3619.54
276.665	3539.18	3539.18	3539.18	3539.18	3539.18	3539.4	3539.18	3539.4	276.942	3770.7	3770.7	3770.7	3770.7	3770.7	3771.61	3770.7	3771.61	277.159	3715.1	3715.1	3715.1	3715.1	3715.1	3715.1	3715.1	3715.1
276.565	3566.9	3566.9	3566.9	3566.9	3566.9	3567.12	3566.9	3567.12	276.842	3728.6	3728.6	3728.6	3728.6	3728.6	3729.49	3728.6	3729.49	277.059	3496.86	3496.86	3496.86	3496.86	3496.86	3496.86	3496.86	3496.86
276.465	3442.02	3442.02	3442.02	3442.02	3442.02	3442.23	3442.02	3442.23	276.742	3809.94	3809.94	3809.94	3809.94	3809.94	3810.81	3809.94	3810.81	276.959	3642.62	3642.62	3642.62	3642.62	3642.62	3642.62	3642.62	3642.62
276.365	3349.04	3349.04	3349.04	3349.04	3349.04	3349.25	3349.04	3349.25	276.642	3821.7	3821.7	3821.7	3821.7	3821.7	3822.55	3821.7	3822.55	276.859	3604.98	3604.98	3604.98	3604.98	3604.98	3604.98	3604.98	3604.98
276.265	3431.76	3431.76	3431.76	3431.76	3431.76	3431.96	3431.76	3431.96	276.542	3783.1	3783.1	3783.1	3783.1	3783.1	3783.93	3783.1	3783.93	276.759	3776.48	3776.48	3776.48	3776.48	3776.48	3776.48	3776.48	3776.48
276.165	3346.48	3346.48	3346.48	3346.48	3346.48	3346.68	3346.48	3346.68	276.442	3671.72	3671.72	3671.72	3671.72	3671.72	3672.53	3671.72	3672.53	276.659	3643.14	3643.14	3643.14	3643.14	3643.14	3643.14	3643.14	3643.14
276.065	3421.14	3421.14	3421.14	3421.14	3421.14	3421.34	3421.14	3421.34	276.342	3684.96	3684.96	3684.96	3684.96	3684.96	3685.75	3684.96	3685.75	276.559	3660.12	3660.12	3660.12	3660.12	3660.12	3660.12	3660.12	3660.12
275.965	3268.02	3268.02	3268.02	3268.02	3268.02	3268.21	3268.02	3268.21	276.242	3653.66	3653.66	3653.66	3653.66	3653.66	3654.43	3653.66	3654.43	276.459	3620.92	3620.92	3620.92	3620.92	3620.92	3620.92	3620.92	3620.92
275.865	3270.86	3270.86	3270.86	3270.86	3270.86	3271.05	3270.86	3271.05	276.142	3754.34	3754.34	3754.34	3754.34	3754.34	3755.1	3754.34	3755.1	276.359	3521.26	3521.26	3521.26	3521.26	3521.26	3521.26	3521.26	3521.26
275.765	3376.62	3376.62	3376.62	3376.62	3376.62	3376.8	3376.62	3376.8	276.042	3618.72	3618.72	3618.72	3618.72	3618.72	3619.46	3618.72	3619.46	276.259	3561.94	3561.94	3561.94	3561.94	3561.94	3561.94	3561.94	3561.94
275.665	3233.08	3233.08	3233.08	3233.08	3233.08	3233.26	3233.08	3233.26	275.942	3635.96	3635.96	3635.96	3635.96	3635.96	3636.68	3635.96	3636.68	276.159	3479	3479	3479	3479	3479	3479	3479	3479
275.565	3183.8	3183.8	3183.8	3183.8	3183.8	3183.97	3183.8	3183.97	275.842	3695.9	3695.9	3695.9	3695.9	3695.9	3696.61	3695.9	3696.61	276.059	3609.6	3609.6	3609.6	3609.6	3609.6	3609.6	3609.6	3609.6
275.465	3123.46	3123.46	3123.46	3123.46	3123.46	3123.63	3123.46	3123.63	275.742	3626.78	3626.78	3626.78	3626.78	3626.78	3627.47	3626.78	3627.47	275.959	3672.02	3672.02	3672.02	3672.02	3672.02	3672.02	3672.02	3672.02
275.365	3284.4	3284.4	3284.4	3284.4	3284.4	3284.57	3284.4	3284.57	275.642	3737.3	3737.3	3737.3	3737.3	3737.3	3737.98	3737.3	3737.98	275.859	3645.9	3645.9	3645.9	3645.9	3645.9	3645.9	3645.9	3645.9
275.265	3063.88	3063.88	3063.88	3063.88	3063.88	3064.04	3063.88	3064.04	275.542	3597.58	3597.58	3597.58	3597.58	3597.58	3598.24	3597.58	3598.24	275.759	3559.12	3559.12	3559.12	3559.12	3559.12	3559.12	3559.12	3559.12
275.165	3089.32	3089.32	3089.32	3089.32	3089.32	3089.48	3089.32	3089.48	275.442	3611.52	3611.52	3611.52	3611.52	3611.52	3612.17	3611.52	3612.17	275.659	3657.02	3657.02	3657.02	3657.02	3657.02	3657.02	3657.02	3657.02
275.065	3177.86	3177.86	3177.86	3177.86	3177.86	3178.02	3177.86	3178.02	275.342	3663.08	3663.08	3663.08	3663.08	3663.08	3663.72	3663.08	3663.72	275.559	3677.74	3677.74	3677.74	3677.74	3677.74	3677.74	3677.74	3677.74
274.965	3176.82	3176.82	3176.82	3176.82	3176.82	3176.97	3176.82	3176.97	275.242	3672.8	3672.8	3672.8	3672.8	3672.8	3673.42	3672.8	3673.42	275.459	3722.36	3722.36	3722.36	3722.36	3722.36	3722.36	3722.36	3722.36
274.865	3107.36	3107.36	3107.36	3107.36	3107.36	3107.51	3107.36	3107.51	275.142	3766.48	3766.48	3766.48	3766.48	3766.48	3767.09	3766.48	3767.09	275.359	3708	3708	3708	3708	3708	3708	3708	3708
274.765	3002	3002	3002	3002	3002	3002.15	3002	3002.15	275.042	3527.42	3527.42	3527.42	3527.42	3527.42	3528.02	3527.42	3528.02	275.259	3492.42	3492.42	3492.42	3492.42	3492.42	3492.42	3492.42	3492.42
274.665	3150.46	3150.46	3150.46	3150.46	3150.46	3150.61	3150.46	3150.61	274.942	3669.92	3669.92	3669.92	3669.92	3669.92	3670.5	3669.92	3670.5	275.159	3564.74	3564.74	3564.74	3564.74	3564.74	3564.74	3564.74	3564.74
274.565	3009.84	3009.84	3009.84	3009.84	3009.84	3009.98	3009.84	3009.98	274.842	3625.44	3625.44	3625.44	3625.44	3625.44	3626.01	3625.44	3626.01	275.059	3681.38	3681.38	3681.38	3681.38	3681.38	3681.38	3681.38	3681.38
274.465	2991.18	2991.18	2991.18	2991.18	2991.18	2991.32	2991.18	2991.32	274.742	3676.96	3676.96	3676.96	3676.96	3676.96	3677.52	3676.96	3677.52	274.959	3748.24	3748.24	3748.24	3748.24	3748.24	3748.24	3748.24	3748.24
274.365	3103.56	3103.56	3103.56	3103.56	3103.56	3103.7	3103.56	3103.7	274.642	3717.72	3717.72	3717.72	3717.72	3717.72	3718.27	3717.72	3718.27	274.859	3619.52	3619.52	3619.52	3619.52	3619.52	3619.52	3619.52	3619.52
274.265	2992.96	2992.96	2992.96	2992.96	2992.96	2993.09	2992.96	2993.09	274.542	3695.02	3695.02	3695.02	3695.02	3695.02	3695.56	3695.02	3695.56	274.759	3601.44	3601.44	3601.44	3601.44	3601.44	3601.44	3601.44	3601.44
274.165	2907.3	2907.3	2907.3	2907.3	2907.3	2907.43	2907.3	2907.43	274.442	3740.06	3740.06	3740.06	3740.06	3740.06	3740.59	3740.06	3740.59	274.659	3644.06	3644.06	3644.06	3644.06	3644.06	3644.06	3644.06	3644.06
274.065	3001.16	3001.16	3001.16	3001.16	3001.16	3001.29	3001.16	3001.29	274.342	3651.08	3651.08	3651.08	3651.08	3651.08	3651.6	3651.08	3651.6	274.559	3570.48	3570.48	3570.48	3570.48	3570.48	3570.48	3570.48	3570.48
273.965	2980.4	2980.4	2980.4	2980.4	2980.4	2980.53	2980.4	2980.53	274.242	3623	3623	3623	3623	3623	3623.51	3623	3623.51	274.459	3651.88	3651.88	3651.88	3651.88	3651.88	3651.88	3651.88	3651.88
273.865	3024.32	3024.32	3024.32	3024.32	3024.32	3024.45	3024.32	3024.45	274.142	3713.8	3713.8	3713.8	3713.8	3713.8	3714.3	3713.8	3714.3	274.359	3688.56	3688.56	3688.56	3688.56	3688.56	3688.56	3688.56	3688.56
273.765	3016.84	3016.84	3016.84	3016.84	3016.84	3016.96	3016.84	3016.96	274.042	3814.32	3814.32	3814.32	3814.32	3814.32	3814.81	3814.32	3814.81	274.259	3750.42	3750.42	3750.42	3750.42	3750.42	3750.42	3750.42	3750.42
273.665	3002.8	3002.8	3002.8	3002.8	3002.8	3002.92	3002.8	3002.92	273.942	3811.04	3811.04	3811.04	3811.04	3811.04	3811.52	3811.04	3811.52	274.159	3744.7	3744.7	3744.7	3744.7	3744.7	3744.7	3744.7	3744.7
273.565	2891.46	2891.46	2891.46	2891.46	2891.46	2891.58	2891.46	2891.58	273.842	3695.22	3695.22	3695.22	3695.22	3695.22	3695.69	3695.22	3695.69	274.059	3748.66	3748.66	3748.66	3748.66	3748.66	3748.66	3748.66	3748.66
273.465	2986.18	2986.18	2986.18	2986.18	2986.18	2986.3	2986.18	2986.3	273.742	3657.54	3657.54	3657.54	3657.54	3657.54	3658	3657.54	3658	273.959	3805.76	3805.76	3805.76	3805.76	3805.76	3805.76	3805.76	3805.76
273.365	3004.14	3004.14	3004.14	3004.14	3004.14	3004.25	3004.14	3004.25	273.642	3818.16	3818.16	3818.16	3818.16	3818.16	3818.61	3818.16	3818.61	273.859	3753	3753	3753	3753	3753	3753	3753	3753
273.265	3030.26	3030.26	3030.26	3030.26	3030.26	3030.37	3030.26	3030.37	273.542	3661.1	3661.1	3661.1	3661.1	3661.1	3661.54	3661.1	3661.54	273.759	3836.8	3836.8	3836.8	3836.8	3836.8	3836.8	3836.8	3836.8
273.165	2912.94	2912.94	2912.94	2912.94	2912.94	2913.05	2912.94	2913.05	273.442	3868.64	3868.64	3868.64	3868.64	3868.64	3869.08	3868.64	3869.08	273.659	3716.64	3716.64	3716.64	3716.64	3716.64	3716.64	3716.64	3716.64
273.065	2999.76	2999.76	2999.76	2999.76	2999.76	2999.87	2999.76	2999.87	273.342	3884.38	3884.38	3884.38	3884.38	3884.38	3884.81	3884.38	3884.81	273.559	3769.8	3769.8	3769.8	3769.8	3769.8	3769.8	3769.8	3769.8
272.965	3005.08	3005.08	3005.08	3005.08	3005.08	3005.19	3005.08	3005.19	273.242	4013.1	4013.1	4013.1	4013.1	4013.1	4013.52	4013.1	4013.52	273.459	3912.6	3912.6	3912.6	3912.6	3912.6	3912.6	3912.6	3912.6
272.865	2863.84	2863.84	2863.84	2863.84	2863.84	2863.94	2863.84	2863.94	273.142	3944	3944	3944	3944	3944	3944.41	3944	3944.41	273.359	3968.26	3968.26	3968.26	3968.26	3968.26	3968.26	3968.26	3968.26
272.765	2883.28	2883.28	2883.28	2883.28	2883.28	2883.38	2883.28	2883.38	273.042	3909.38	3909.38	3909.38	3909.38	3909.38	3909.78	3909.38	3909.78	273.259	4024.5	4024.5	4024.5	4024.5	4024.5	4024.5	4024.5	4024.5
272.665	2995.88	2995.88	2995.88	2995.88	2995.88	2995.98	2995.88	2995.98	272.942	3949.06	3949.06	3949.06	3949.06	3949.06	3949.46	3949.06	3949.46	273.159	4034.8	4034.8	4034.8	4034.8	4034.8	4034.8	4034.8	4034.8
272.565	2976.96	2976.96	2976.96	2976.96	2976.96	2977.06	2976.96	2977.06	272.842	4120.1	4120.1	4120.1	4120.1	4120.1	4120.49	4120.1	4120.49	273.059	4016.84	4016.84	4016.84	4016.84	4016.84	4016.84	4016.84	4016.84
272.465	2852.88	2852.88	2852.88	2852.88	2852.88	2852.98	2852.88	2852.98	272.742	4052.74	4052.74	4052.74	4052.74	4052.74	4053.12	4052.74	4053.12	272.959	3941.26	3941.26	3941.26	3941.26	3941.26	3941.26	3941.26	3941.26
272.365	2819.98	2819.98	2819.98	2819.98	2819.98	2820.07	2819.98	2820.07	272.642	4103.38	4103.38	4103.38	4103.38	4103.38	4103.76	4103.38	4103.76	272.859	4098.88	4098.88	4098.88	4098.88	4098.88	4098.88	4098.88	4098.88
272.265	2956.72	2956.72	2956.72	2956.72	2956.72	2956.81	2956.72	2956.81	272.542	4072.3	4072.3	4072.3	4072.3	4072.3	4072.67	4072.3	4072.67	272.759	4241.74	4241.74	4241.74	4241.74	4241.74	4241.74	4241.74	4241.74
272.165	2993.68	2993.68	2993.68	2993.68	2993.68	2993.77	2993.68	2993.77	272.442	4107.44	4107.44	4107.44	4107.44	4107.44	4107.8	4107.44	4107.8	272.659	4306.2	4306.2	4306.2	4306.2	4306.2	4306.2	4306.2	4306.2
272.065	2967.06	2967.06	2967.06	2967.06	2967.06	2967.15	2967.06	2967.15	272.342	4148.24	4148.24	4148.24	4148.24	4148.24	4148.6	4148.24	4148.6	272.559	4183.94	4183.94	4183.94	4183.94	4183.94	4183.94	4183.94	4183.94
271.965	2926.38	2926.38	2926.38	2926.38	2926.38	2926.47	2926.38	2926.47	272.242	4326.6	4326.6	4326.6	4326.6	4326.6	4326.95	4326.6	4326.95	272.459	4406.3	4406.3	4406.3	4406.3	4406.3	4406.3	4406.3	4406.3
271.865	2890.28	2890.28	2890.28	2890.28	2890.28	2890.37	2890.28	2890.37	272.142	4254.84	4254.84	4254.84	4254.84	4254.84	4255.19	4254.84	4255.19	272.359	4455.84	4455.84	4455.84	4455.84	4455.84	4455.84	4455.84	4455.84
271.765	2756.74	2756.74	2756.74	2756.74	2756.74	2756.83	2756.74	2756.83	272.042	4495.14	4495.14	4495.14	4495.14	4495.14	4495.48	4495.14	4495.48	272.259	4354.16	4354.16	4354.16	4354.16	4354.16	4354.16	4354.16	4354.16
271.665	2952.96	2952.96	2952.96	2952.96	2952.96	2953.05	2952.96	2953.05	271.942	4513.82	4513.82	4513.82	4513.82	4513.82	4514.15	4513.82	4514.15	272.159	4570.3	4570.3	4570.3	4570.3	4570.3	4570.3	4570.3	4570.3
271.565	2955.74	2955.74	2955.74	2955.74	2955.74	2955.82	2955.74	2955.82	271.842	4622.1	4622.1	4622.1	4622.1	4622.1	4622.43	4622.1	4622.43	272.059	4675	4675	4675	4675	4675	4675	4675	4675
271.465	2914.7	2914.7	2914.7	2914.7	2914.7	2914.78	2914.7	2914.78	271.742	4913.92	4913.92	4913.92	4913.92	4913.92	4914.24	4913.92	4914.24	271.959	4677.3	4677.3	4677.3	4677.3	4677.3	4677.3	4677.3	4677.3
271.365	2916.04	2916.04	2916.04	2916.04	2916.04	2916.12	2916.04	2916.12	271.642	4780.84	4780.84	4780.84	4780.84	4780.84	4781.16	4780.84	4781.16	271.859	5023.62	5023.62	5023.62	5023.62	5023.62	5023.62	5023.62	5023.62
271.265	2962.98	2962.98	2962.98	2962.98	2962.98	2963.06	2962.98	2963.06	271.542	4981.94	4981.94	4981.94	4981.94	4981.94	4982.25	4981.94	4982.25	271.759	5052.58	5052.58	5052.58	5052.58	5052.58	5052.58	5052.58	5052.58
271.165	2910.4	2910.4	2910.4	2910.4	2910.4	2910.48	2910.4	2910.48	271.442	5078.34	5078.34	5078.34	5078.34	5078.34	5078.65	5078.34	5078.65	271.659	5103.28	5103.28	5103.28	5103.28	5103.28	5103.28	5103.28	5103.28
271.065	2984.38	2984.38	2984.38	2984.38	2984.38	2984.46	2984.38	2984.46	271.342	5262.44	5262.44	5262.44	5262.44	5262.44	5262.74	5262.44	5262.74	271.559	5288.48	5288.48	5288.48	5288.48	5288.48	5288.48	5288.48	5288.48
270.965	2897.22	2897.22	2897.22	2897.22	2897.22	2897.3	2897.22	2897.3	271.242	5447.84	5447.84	5447.84	5447.84	5447.84	5448.14	5447.84	5448.14	271.459	5674.34	5674.34	5674.34	5674.34	5674.34	5674.34	5674.34	5674.34
270.865	3011.4	3011.4	3011.4	3011.4	3011.4	3011.47	3011.4	3011.47	271.142	5538.52	5538.52	5538.52	5538.52	5538.52	5538.81	5538.52	5538.81	271.359	5619.26	5619.26	5619.26	5619.26	5619.26	5619.26	5619.26	5619.26
270.765	2901.58	2901.58	2901.58	2901.58	2901.58	2901.65	2901.58	2901.65	271.042	5593.7	5593.7	5593.7	5593.7	5593.7	5593.99	5593.7	5593.99	271.259	5974.2	5974.2	5974.2	5974.2	5974.2	5974.2	5974.2	5974.2
270.665	2917.8	2917.8	2917.8	2917.8	2917.8	2917.87	2917.8	2917.87	270.942	6091.82	6091.82	6091.82	6091.82	6091.82	6092.1	6091.82	6092.1	271.159	6241.82	6241.82	6241.82	6241.82	6241.82	6241.82	6241.82	6241.82
270.565	2871.68	2871.68	2871.68	2871.68	2871.68	2871.75	2871.68	2871.75	270.842	6353.94	6353.94	6353.94	6353.94	6353.94	6354.22	6353.94	6354.22	271.059	6421.1	6421.1	6421.1	6421.1	6421.1	6421.1	6421.1	6421.1
270.465	2980.16	2980.16	2980.16	2980.16	2980.16	2980.23	2980.16	2980.23	270.742	6314.5	6314.5	6314.5	6314.5	6314.5	6314.77	6314.5	6314.77	270.959	6824.28	6824.28	6824.28	6824.28	6824.28	6824.28	6824.28	6824.28
270.365	2927.86	2927.86	2927.86	2927.86	2927.86	2927.93	2927.86	2927.93	270.642	6672.46	6672.46	6672.46	6672.46	6672.46	6672.73	6672.46	6672.73	270.859	7064.18	7064.18	7064.18	7064.18	7064.18	7064.18	7064.18	7064.18
270.265	2960.98	2960.98	2960.98	2960.98	2960.98	2961.05	2960.98	2961.05	270.542	7139.62	7139.62	7139.62	7139.62	7139.62	7139.89	7139.62	7139.89	270.759	7276.28	7276.28	7276.28	7276.28	7276.28	7276.28	7276.28	7276.28
270.165	3064.24	3064.24	3064.24	3064.24	3064.24	3064.31	3064.24	3064.31	270.442	7020.44	7020.44	7020.44	7020.44	7020.44	7020.7	7020.44	7020.7	270.659	7685.1	7685.1	7685.1	7685.1	7685.1	7685.1	7685.1	7685.1
270.065	2923.48	2923.48	2923.48	2923.48	2923.48	2923.55	2923.48	2923.55	270.342	7423.04	7423.04	7423.04	7423.04	7423.04	7423.3	7423.04	7423.3	270.559	8162.2	8162.2	8162.2	8162.2	8162.2	8162.2	8162.2	8162.2
269.965	2776.58	2776.58	2776.58	2776.58	2776.58	2776.64	2776.58	2776.64	270.242	7961.22	7961.22	7961.22	7961.22	7961.22	7961.47	7961.22	7961.47	270.459	8298.36	8298.36	8298.36	8298.36	8298.36	8298.36	8298.36	8298.36
269.865	2899.54	2899.54	2899.54	2899.54	2899.54	2899.6	2899.54	2899.6	270.142	8052.08	8052.08	8052.08	8052.08	8052.08	8052.33	8052.08	8052.33	270.359	8593.32	8593.32	8593.32	8593.32	8593.32	8593.32	8593.32	8593.32
269.765	2936.68	2936.68	2936.68	2936.68	2936.68	2936.74	2936.68	2936.74	270.042	8388.82	8388.82	8388.82	8388.82	8388.82	8389.07	8388.82	8389.07	270.259	8815.26	8815.26	8815.26	8815.26	8815.26	8815.26	8815.26	8815.26
269.665	2958.38	2958.38	2958.38	2958.38	2958.38	2958.44	2958.38	2958.44	269.942	8267.22	8267.22	8267.22	8267.22	8267.22	8267.46	8267.22	8267.46	270.159	9059	9059	9059	9059	9059	9059	9059	9059
269.565	2963.38	2963.38	2963.38	2963.38	2963.38	2963.44	2963.38	2963.44	269.842	8644.36	8644.36	8644.36	8644.36	8644.36	8644.6	8644.36	8644.6	270.059	9165.02	9165.02	9165.02	9165.02	9165.02	9165.02	9165.02	9165.02
269.465	2958.24	2958.24	2958.24	2958.24	2958.24	2958.3	2958.24	2958.3	269.742	8604.44	8604.44	8604.44	8604.44	8604.44	8604.67	8604.44	8604.67	269.959	9038.1	9038.1	9038.1	9038.1	9038.1	9038.1	9038.1	9038.1
269.365	2934.24	2934.24	2934.24	2934.24	2934.24	2934.3	2934.24	2934.3	269.642	8839.78	8839.78	8839.78	8839.78	8839.78	8840.01	8839.78	8840.01	269.859	9091.32	9091.32	9091.32	9091.32	9091.32	9091.32	9091.32	9091.32
269.265	2988.78	2988.78	2988.78	2988.78	2988.78	2988.84	2988.78	2988.84	269.542	8638.16	8638.16	8638.16	8638.16	8638.16	8638.39	8638.16	8638.39	269.759	9266.02	9266.02	9266.02	9266.02	9266.02	9266.02	9266.02	9266.02
269.165	2962	2962	2962	2962	2962	2962.06	2962	2962.06	269.442	8613.28	8613.28	8613.28	8613.28	8613.28	8613.5	8613.28	8613.5	269.659	9118.86	9118.86	9118.86	9118.86	9118.86	9118.86	9118.86	9118.86
269.065	3010.58	3010.58	3010.58	3010.58	3010.58	3010.64	3010.58	3010.64	269.342	8570.72	8570.72	8570.72	8570.72	8570.72	8570.94	8570.72	8570.94	269.559	8901.2	8901.2	8901.2	8901.2	8901.2	8901.2	8901.2	8901.2
268.965	2978.18	2978.18	2978.18	2978.18	2978.18	2978.24	2978.18	2978.24	269.242	8388.54	8388.54	8388.54	8388.54	8388.54	8388.76	8388.54	8388.76	269.459	8923.04	8923.04	8923.04	8923.04	8923.04	8923.04	8923.04	8923.04
268.865	2975.28	2975.28	2975.28	2975.28	2975.28	2975.34	2975.28	2975.34	269.142	8211.66	8211.66	8211.66	8211.66	8211.66	8211.87	8211.66	8211.87	269.359	8836.98	8836.98	8836.98	8836.98	8836.98	8836.98	8836.98	8836.98
268.765	3048.46	3048.46	3048.46	3048.46	3048.46	3048.51	3048.46	3048.51	269.042	8059.24	8059.24	8059.24	8059.24	8059.24	8059.45	8059.24	8059.45	269.259	8523.48	8523.48	8523.48	8523.48	8523.48	8523.48	8523.48	8523.48
268.665	2891.36	2891.36	2891.36	2891.36	2891.36	2891.41	2891.36	2891.41	268.942	7711.9	7711.9	7711.9	7711.9	7711.9	7712.11	7711.9	7712.11	269.159	8215.38	8215.38	8215.38	8215.38	8215.38	8215.38	8215.38	8215.38
268.565	2980.7	2980.7	2980.7	2980.7	2980.7	2980.75	2980.7	2980.75	268.842	7533.9	7533.9	7533.9	7533.9	7533.9	7534.1	7533.9	7534.1	269.059	8101.08	8101.08	8101.08	8101.08	8101.08	8101.08	8101.08	8101.08
268.465	2991.92	2991.92	2991.92	2991.92	2991.92	2991.97	2991.92	2991.97	268.742	7210.94	7210.94	7210.94	7210.94	7210.94	7211.14	7210.94	7211.14	268.959	7490.98	7490.98	7490.98	7490.98	7490.98	7490.98	7490.98	7490.98

## Sheet: XPS data O1
Name	O 1s	O 1s	O 1s	O 1s							Name	O 1s	O 1s	O 1s	O 1s								Name	O 1s	O 1s	O 1s	O 1s
Position	530.18	531.43	532	533.45							Position	530.45	531.52	532.13	533.60								Position	530.52	531.39	532.00	533.11
X60_FWHM	X60_530	X60_531	X60_532	X60_533	X60_Background	X60_Envelope		Cycle 60.048:60 seconds:O1s Scan:CPS			X500_FWHM	X500_530	X500_531	X500_532	X500_533	X500_Background	X500_Envelope		Cycle 500:500 seconds:O1s Scan:CPS				Surface_FWHM	Surface_530	Surface_531	Surface_532	Surface_533	Surface_Background	Surface_Envelope		Cycle 3:surface:O1s Scan:CPS
548.742	34472.8	34472.8	34472.8	34472.8	34472.8	34472.8		34472.8			548.959	34167.4	34167.4	34167.4	34167.4	34167.4	34167.4		34167.4				548.465	30552.4	30552.4	30552.4	30552.4	30552.4	30552.4		30552.4
548.642	34384.4	34384.4	34384.4	34384.4	34384.4	34384.4		34384.4			548.859	33733.6	33733.6	33733.6	33733.6	33733.6	33733.6		33733.6				548.365	30162.6	30162.6	30162.6	30162.6	30162.6	30162.6		30162.6
548.542	34213.4	34213.4	34213.4	34213.4	34213.4	34213.4		34213.4			548.759	34235.2	34235.2	34235.2	34235.2	34235.2	34235.2		34235.2				548.265	30707	30707	30707	30707	30707	30707		30707
548.442	33558.2	33558.2	33558.2	33558.2	33558.2	33558.2		33558.2			548.659	33627	33627	33627	33627	33627	33627		33627				548.165	29935.6	29935.6	29935.6	29935.6	29935.6	29935.6		29935.6
548.342	33963.2	33963.2	33963.2	33963.2	33963.2	33963.2		33963.2			548.559	33408.2	33408.2	33408.2	33408.2	33408.2	33408.2		33408.2				548.065	30167.4	30167.4	30167.4	30167.4	30167.4	30167.4		30167.4
548.242	33622	33622	33622	33622	33622	33622		33622			548.459	33798.8	33798.8	33798.8	33798.8	33798.8	33798.8		33798.8				547.965	30250.6	30250.6	30250.6	30250.6	30250.6	30250.6		30250.6
548.142	33654.6	33654.6	33654.6	33654.6	33654.6	33654.6		33654.6			548.359	33635	33635	33635	33635	33635	33635		33635				547.865	29677.6	29677.6	29677.6	29677.6	29677.6	29677.6		29677.6
548.042	33602.2	33602.2	33602.2	33602.2	33602.2	33602.2		33602.2			548.259	33699.6	33699.6	33699.6	33699.6	33699.6	33699.6		33699.6				547.765	29359.2	29359.2	29359.2	29359.2	29359.2	29359.2		29359.2
547.942	32957.2	32957.2	32957.2	32957.2	32957.2	32957.2		32957.2			548.159	33368.6	33368.6	33368.6	33368.6	33368.6	33368.6		33368.6				547.665	29352.6	29352.6	29352.6	29352.6	29352.6	29352.6		29352.6
547.842	32958.8	32958.8	32958.8	32958.8	32958.8	32958.8		32958.8			548.059	32737.8	32737.8	32737.8	32737.8	32737.8	32737.8		32737.8				547.565	29017.8	29017.8	29017.8	29017.8	29017.8	29017.8		29017.8
547.742	33166.2	33166.2	33166.2	33166.2	33166.2	33166.2		33166.2			547.959	32860.2	32860.2	32860.2	32860.2	32860.2	32860.2		32860.2				547.465	29357.8	29357.8	29357.8	29357.8	29357.8	29357.8		29357.8
547.642	32817.4	32817.4	32817.4	32817.4	32817.4	32817.4		32817.4			547.859	32460.2	32460.2	32460.2	32460.2	32460.2	32460.2		32460.2				547.365	28905.6	28905.6	28905.6	28905.6	28905.6	28905.6		28905.6
547.542	32980.6	32980.6	32980.6	32980.6	32980.6	32980.6		32980.6			547.759	32330.2	32330.2	32330.2	32330.2	32330.2	32330.2		32330.2				547.265	29066.4	29066.4	29066.4	29066.4	29066.4	29066.4		29066.4
547.442	32838.6	32838.6	32838.6	32838.6	32838.6	32838.6		32838.6			547.659	32094	32094	32094	32094	32094	32094		32094				547.165	28638.2	28638.2	28638.2	28638.2	28638.2	28638.2		28638.2
547.342	31993.4	31993.4	31993.4	31993.4	31993.4	31993.4		31993.4			547.559	32233.4	32233.4	32233.4	32233.4	32233.4	32233.4		32233.4				547.065	28513.4	28513.4	28513.4	28513.4	28513.4	28513.4		28513.4
547.242	32292	32292	32292	32292	32292	32292		32292			547.459	32241.8	32241.8	32241.8	32241.8	32241.8	32241.8		32241.8				546.965	28178	28178	28178	28178	28178	28178		28178
547.142	31746.8	31746.8	31746.8	31746.8	31746.8	31746.8		31746.8			547.359	31857.6	31857.6	31857.6	31857.6	31857.6	31857.6		31857.6				546.865	27992.2	27992.2	27992.2	27992.2	27992.2	27992.2		27992.2
547.042	31632	31632	31632	31632	31632	31632		31632			547.259	31869.2	31869.2	31869.2	31869.2	31869.2	31869.2		31869.2				546.765	27991	27991	27991	27991	27991	27991		27991
546.942	31328	31328	31328	31328	31328	31328		31328			547.159	31805.8	31805.8	31805.8	31805.8	31805.8	31805.8		31805.8				546.665	27647	27647	27647	27647	27647	27647		27647
546.842	31403.8	31403.8	31403.8	31403.8	31403.8	31403.8		31403.8			547.059	31181.8	31181.8	31181.8	31181.8	31181.8	31181.8		31181.8				546.565	27313	27313	27313	27313	27313	27313		27313
546.742	31143.6	31143.6	31143.6	31143.6	31143.6	31143.6		31143.6			546.959	30972.2	30972.2	30972.2	30972.2	30972.2	30972.2		30972.2				546.465	27571	27571	27571	27571	27571	27571		27571
546.642	30761	30761	30761	30761	30761	30761		30761			546.859	31207	31207	31207	31207	31207	31207		31207				546.365	27439	27439	27439	27439	27439	27439		27439
546.542	30550.2	30550.2	30550.2	30550.2	30550.2	30550.2		30550.2			546.759	31154	31154	31154	31154	31154	31154		31154				546.265	26930.8	26930.8	26930.8	26930.8	26930.8	26930.8		26930.8
546.442	30222.6	30222.6	30222.6	30222.6	30222.6	30222.6		30222.6			546.659	31119	31119	31119	31119	31119	31119		31119				546.165	26701.6	26701.6	26701.6	26701.6	26701.6	26701.6		26701.6
546.342	30381.8	30381.8	30381.8	30381.8	30381.8	30381.8		30381.8			546.559	30470.2	30470.2	30470.2	30470.2	30470.2	30470.2		30470.2				546.065	26775	26775	26775	26775	26775	26775		26775
546.242	29926.2	29926.2	29926.2	29926.2	29926.2	29926.2		29926.2			546.459	30619	30619	30619	30619	30619	30619		30619				545.965	26196	26196	26196	26196	26196	26196		26196
546.142	30341.8	30341.8	30341.8	30341.8	30341.8	30341.8		30341.8			546.359	30545.4	30545.4	30545.4	30545.4	30545.4	30545.4		30545.4				545.865	25971.2	25971.2	25971.2	25971.2	25971.2	25971.2		25971.2
546.042	30160.8	30160.8	30160.8	30160.8	30160.8	30160.8		30160.8			546.259	30680.4	30680.4	30680.4	30680.4	30680.4	30680.4		30680.4				545.765	25992.6	25992.6	25992.6	25992.6	25992.6	25992.6		25992.6
545.942	29588.4	29588.4	29588.4	29588.4	29588.4	29588.4		29588.4			546.159	30475.4	30475.4	30475.4	30475.4	30475.4	30475.4		30475.4				545.665	25594	25594	25594	25594	25594	25594		25594
545.842	29353	29353	29353	29353	29353	29353		29353			546.059	30190.6	30190.6	30190.6	30190.6	30190.6	30190.6		30190.6				545.565	25847.8	25847.8	25847.8	25847.8	25847.8	25847.8		25847.8
545.742	29503.4	29503.4	29503.4	29503.4	29503.4	29503.4		29503.4			545.959	30082.2	30082.2	30082.2	30082.2	30082.2	30082.2		30082.2				545.465	25443.8	25443.8	25443.8	25443.8	25443.8	25443.8		25443.8
545.642	29075.8	29075.8	29075.8	29075.8	29075.8	29075.8		29075.8			545.859	30001.8	30001.8	30001.8	30001.8	30001.8	30001.8		30001.8				545.365	25044.6	25044.6	25044.6	25044.6	25044.6	25044.6		25044.6
545.542	28844.4	28844.4	28844.4	28844.4	28844.4	28844.4		28844.4			545.759	29744.8	29744.8	29744.8	29744.8	29744.8	29744.8		29744.8				545.265	25135.2	25135.2	25135.2	25135.2	25135.2	25135.2		25135.2
545.442	28828	28828	28828	28828	28828	28828		28828			545.659	29734.4	29734.4	29734.4	29734.4	29734.4	29734.4		29734.4				545.165	24868.2	24868.2	24868.2	24868.2	24868.2	24868.2		24868.2
545.342	28679.4	28679.4	28679.4	28679.4	28679.4	28679.4		28679.4			545.559	28924.4	28924.4	28924.4	28924.4	28924.4	28924.4		28924.4				545.065	24854	24854	24854	24854	24854	24854		24854
545.242	28344.2	28344.2	28344.2	28344.2	28344.2	28344.2		28344.2			545.459	29301.6	29301.6	29301.6	29301.6	29301.6	29301.6		29301.6				544.965	24627.6	24627.6	24627.6	24627.6	24627.6	24627.6		24627.6
545.142	28255	28255	28255	28255	28255	28255		28255			545.359	29205.6	29205.6	29205.6	29205.6	29205.6	29205.6		29205.6				544.865	24340	24340	24340	24340	24340	24340		24340
545.042	28314.8	28314.8	28314.8	28314.8	28314.8	28314.8		28314.8			545.259	28945.4	28945.4	28945.4	28945.4	28945.4	28945.4		28945.4				544.765	24232.2	24232.2	24232.2	24232.2	24232.2	24232.2		24232.2
544.942	27746.6	27746.6	27746.6	27746.6	27746.6	27746.6		27746.6			545.159	29031.6	29031.6	29031.6	29031.6	29031.6	29031.6		29031.6				544.665	24221.6	24221.6	24221.6	24221.6	24221.6	24221.6		24221.6
544.842	27816	27816	27816	27816	27816	27816		27816			545.059	29065.6	29065.6	29065.6	29065.6	29065.6	29065.6		29065.6				544.565	23675	23675	23675	23675	23675	23675		23675
544.742	27803	27803	27803	27803	27803	27803		27803			544.959	28591	28591	28591	28591	28591	28591		28591				544.465	24064	24064	24064	24064	24064	24064		24064
544.642	27585.2	27585.2	27585.2	27585.2	27585.2	27585.2		27585.2			544.859	28556.6	28556.6	28556.6	28556.6	28556.6	28556.6		28556.6				544.365	23631.2	23631.2	23631.2	23631.2	23631.2	23631.2		23631.2
544.542	27499	27499	27499	27499	27499	27499		27499			544.759	28352.4	28352.4	28352.4	28352.4	28352.4	28352.4		28352.4				544.265	23631.4	23631.4	23631.4	23631.4	23631.4	23631.4		23631.4
544.442	27463.4	27463.4	27463.4	27463.4	27463.4	27463.4		27463.4			544.659	28202.8	28202.8	28202.8	28202.8	28202.8	28202.8		28202.8				544.165	23224.2	23224.2	23224.2	23224.2	23224.2	23224.2		23224.2
544.342	27221	27221	27221	27221	27221	27221		27221			544.559	28480.4	28480.4	28480.4	28480.4	28480.4	28480.4		28480.4				544.065	23256	23256	23256	23256	23256	23256		23256
544.242	27630.6	27630.6	27630.6	27630.6	27630.6	27630.6		27630.6			544.459	28216	28216	28216	28216	28216	28216		28216				543.965	22976	22976	22976	22976	22976	22976		22976
544.142	26772	26772	26772	26772	26772	26772		26772			544.359	28101.2	28101.2	28101.2	28101.2	28101.2	28101.2		28101.2				543.865	23021.2	23021.2	23021.2	23021.2	23021.2	23021.2		23021.2
544.042	26836.6	26836.6	26836.6	26836.6	26836.6	26836.6		26836.6			544.259	28022.4	28022.4	28022.4	28022.4	28022.4	28022.4		28022.4				543.765	23083	23083	23083	23083	23083	23083		23083
543.942	26711.4	26711.4	26711.4	26711.4	26711.4	26711.4		26711.4			544.159	28038.2	28038.2	28038.2	28038.2	28038.2	28038.2		28038.2				543.665	22993.2	22993.2	22993.2	22993.2	22993.2	22993.2		22993.2
543.842	27277.8	27277.8	27277.8	27277.8	27277.8	27277.8		27277.8			544.059	28009.4	28009.4	28009.4	28009.4	28009.4	28009.4		28009.4				543.565	22709.2	22709.2	22709.2	22709.2	22709.2	22709.2		22709.2
543.742	26992.6	26992.6	26992.6	26992.6	26992.6	26992.6		26992.6			543.959	27747.8	27747.8	27747.8	27747.8	27747.8	27747.8		27747.8				543.465	22959.4	22959.4	22959.4	22959.4	22959.4	22959.4		22959.4
543.642	26757.2	26757.2	26757.2	26757.2	26757.2	26757.2		26757.2			543.859	27931.8	27931.8	27931.8	27931.8	27931.8	27931.8		27931.8				543.365	23064.4	23064.4	23064.4	23064.4	23064.4	23064.4		23064.4
543.542	26816.8	26816.8	26816.8	26816.8	26816.8	26816.8		26816.8			543.759	28237.8	28237.8	28237.8	28237.8	28237.8	28237.8		28237.8				543.265	23064	23064	23064	23064	23064	23064		23064
543.442	26951.2	26951.2	26951.2	26951.2	26951.2	26951.2		26951.2			543.659	27838.2	27838.2	27838.2	27838.2	27838.2	27838.2		27838.2				543.165	22599	22599	22599	22599	22599	22599		22599
543.342	26843	26843	26843	26843	26843	26843		26843			543.559	28092	28092	28092	28092	28092	28092		28092				543.065	22427.6	22427.6	22427.6	22427.6	22427.6	22427.6		22427.6
543.242	26813.8	26813.8	26813.8	26813.8	26813.8	26813.8		26813.8			543.459	28159	28159	28159	28159	28159	28159		28159				542.965	22512.2	22512.2	22512.2	22512.2	22512.2	22512.2		22512.2
543.142	26733.8	26733.8	26733.8	26733.8	26733.8	26733.8		26733.8			543.359	28187.8	28187.8	28187.8	28187.8	28187.8	28187.8		28187.8				542.865	22462.8	22462.8	22462.8	22462.8	22462.8	22462.8		22462.8
543.042	26678.4	26678.4	26678.4	26678.4	26678.4	26678.4		26678.4			543.259	27713	27713	27713	27713	27713	27713		27713				542.765	22205.8	22205.8	22205.8	22205.8	22205.8	22205.8		22205.8
542.942	26641	26641	26641	26641	26641	26641		26641			543.159	28020	28020	28020	28020	28020	28020		28020				542.665	21818.2	21818.2	21818.2	21818.2	21818.2	21818.2		21818.2
542.842	26385.4	26385.4	26385.4	26385.4	26385.4	26385.4		26385.4			543.059	28006.2	28006.2	28006.2	28006.2	28006.2	28006.2		28006.2				542.565	21648.8	21648.8	21648.8	21648.8	21648.8	21648.8		21648.8
542.742	26704.8	26704.8	26704.8	26704.8	26704.8	26704.8		26704.8			542.959	27670.8	27670.8	27670.8	27670.8	27670.8	27670.8		27670.8				542.465	21774.6	21774.6	21774.6	21774.6	21774.6	21774.6		21774.6
542.642	26785.6	26785.6	26785.6	26785.6	26785.6	26785.6		26785.6			542.859	27867.8	27867.8	27867.8	27867.8	27867.8	27867.8		27867.8				542.365	21817.8	21817.8	21817.8	21817.8	21817.8	21817.8		21817.8
542.542	26752.4	26752.4	26752.4	26752.4	26752.4	26752.4		26752.4			542.759	27813.6	27813.6	27813.6	27813.6	27813.6	27813.6		27813.6				542.265	21749.2	21749.2	21749.2	21749.2	21749.2	21749.2		21749.2
542.442	26780.8	26780.8	26780.8	26780.8	26780.8	26780.8		26780.8			542.659	27664.4	27664.4	27664.4	27664.4	27664.4	27664.4		27664.4				542.165	21371.8	21371.8	21371.8	21371.8	21371.8	21371.8		21371.8
542.342	26451.4	26451.4	26451.4	26451.4	26451.4	26451.4		26451.4			542.559	27310	27310	27310	27310	27310	27310		27310				542.065	21508.4	21508.4	21508.4	21508.4	21508.4	21508.4		21508.4
542.242	26173.6	26173.6	26173.6	26173.6	26173.6	26173.6		26173.6			542.459	27300.6	27300.6	27300.6	27300.6	27300.6	27300.6		27300.6				541.965	21117.4	21117.4	21117.4	21117.4	21117.4	21117.4		21117.4
542.142	26161.6	26161.6	26161.6	26161.6	26161.6	26161.6		26161.6			542.359	27499.6	27499.6	27499.6	27499.6	27499.6	27499.6		27499.6				541.865	20902	20902	20902	20902	20902	20902		20902
542.042	26152.4	26152.4	26152.4	26152.4	26152.4	26152.4		26152.4			542.259	27319.4	27319.4	27319.4	27319.4	27319.4	27319.4		27319.4				541.765	20916.4	20916.4	20916.4	20916.4	20916.4	20916.4		20916.4
541.942	26170.2	26170.2	26170.2	26170.2	26170.2	26170.2		26170.2			542.159	27025.2	27025.2	27025.2	27025.2	27025.2	27025.2		27025.2				541.665	20960.4	20960.4	20960.4	20960.4	20960.4	20960.4		20960.4
541.842	25548.4	25548.4	25548.4	25548.4	25548.4	25548.4		25548.4			542.059	26636	26636	26636	26636	26636	26636		26636				541.565	20244.8	20244.8	20244.8	20244.8	20244.8	20244.8		20244.8
541.742	25363.4	25363.4	25363.4	25363.4	25363.4	25363.4		25363.4			541.959	26336.4	26336.4	26336.4	26336.4	26336.4	26336.4		26336.4				541.465	20748.2	20748.2	20748.2	20748.2	20748.2	20748.2		20748.2
541.642	24821.8	24821.8	24821.8	24821.8	24821.8	24821.8		24821.8			541.859	26583.8	26583.8	26583.8	26583.8	26583.8	26583.8		26583.8				541.365	20299.6	20299.6	20299.6	20299.6	20299.6	20299.6		20299.6
541.542	25121.6	25121.6	25121.6	25121.6	25121.6	25121.6		25121.6			541.759	26333.6	26333.6	26333.6	26333.6	26333.6	26333.6		26333.6				541.265	19929.2	19929.2	19929.2	19929.2	19929.2	19929.2		19929.2
541.442	24674.8	24674.8	24674.8	24674.8	24674.8	24674.8		24674.8			541.659	25876.8	25876.8	25876.8	25876.8	25876.8	25876.8		25876.8				541.165	19954.2	19954.2	19954.2	19954.2	19954.2	19954.2		19954.2
541.342	24340.6	24340.6	24340.6	24340.6	24340.6	24340.6		24340.6			541.559	25468.8	25468.8	25468.8	25468.8	25468.8	25468.8		25468.8				541.065	20163.4	20163.4	20163.4	20163.4	20163.4	20163.4		20163.4
541.242	23906.6	23906.6	23906.6	23906.6	23906.6	23906.6		23906.6			541.459	25581	25581	25581	25581	25581	25581		25581				540.965	19548	19548	19548	19548	19548	19548		19548
541.142	23813.6	23813.6	23813.6	23813.6	23813.6	23813.6		23813.6			541.359	25595.6	25595.6	25595.6	25595.6	25595.6	25595.6		25595.6				540.865	19085.8	19085.8	19085.8	19085.8	19085.8	19085.8		19085.8
541.042	23421.8	23421.8	23421.8	23421.8	23421.8	23421.8		23421.8			541.259	25177.8	25177.8	25177.8	25177.8	25177.8	25177.8		25177.8				540.765	19075.3	19075.3	19075.3	19075.3	19075.3	19075.3		19075.3
540.942	23402.6	23402.6	23402.6	23402.6	23402.6	23402.6		23402.6			541.159	24863.2	24863.2	24863.2	24863.2	24863.2	24863.2		24863.2				540.665	18817.8	18817.8	18817.8	18817.8	18817.8	18817.8		18817.8
540.842	23565.2	23565.2	23565.2	23565.2	23565.2	23565.2		23565.2			541.059	24796	24796	24796	24796	24796	24796		24796				540.565	18988.1	18988.1	18988.1	18988.1	18988.1	18988.1		18988.1
540.742	23236.2	23236.2	23236.2	23236.2	23236.2	23236.2		23236.2			540.959	24512	24512	24512	24512	24512	24512		24512				540.465	18621.9	18621.9	18621.9	18621.9	18621.9	18621.9		18621.9
540.642	22785.2	22785.2	22785.2	22785.2	22785.2	22785.2		22785.2			540.859	24679.8	24679.8	24679.8	24679.8	24679.8	24679.8		24679.8				540.365	18481.4	18481.4	18481.4	18481.4	18481.4	18481.4		18481.4
540.542	23010.2	23010.2	23010.2	23010.2	23010.2	23010.2		23010.2			540.759	24642.2	24642.2	24642.2	24642.2	24642.2	24642.2		24642.2				540.265	18337.1	18337.1	18337.1	18337.1	18337.1	18337.1		18337.1
540.442	22726	22726	22726	22726	22726	22726		22726			540.659	24577.4	24577.4	24577.4	24577.4	24577.4	24577.4		24577.4				540.165	17727.5	17727.5	17727.5	17727.5	17727.5	17727.5		17727.5
540.342	22378.4	22378.4	22378.4	22378.4	22378.4	22378.4		22378.4			540.559	24041	24041	24041	24041	24041	24041		24041				540.065	17700.8	17700.8	17700.8	17700.8	17700.8	17700.8		17700.8
540.242	21838.2	21838.2	21838.2	21838.2	21838.2	21838.2		21838.2			540.459	23759.2	23759.2	23759.2	23759.2	23759.2	23759.2		23759.2				539.965	17454.2	17454.2	17454.2	17454.2	17454.2	17454.2		17454.2
540.142	21667.6	21667.6	21667.6	21667.6	21667.6	21667.6		21667.6			540.359	23679.2	23679.2	23679.2	23679.2	23679.2	23679.2		23679.2				539.865	17340.9	17340.9	17340.9	17340.9	17340.9	17340.9		17340.9
540.042	21858.2	21858.2	21858.2	21858.2	21858.2	21858.2		21858.2			540.259	23629.8	23629.8	23629.8	23629.8	23629.8	23629.8		23629.8				539.765	17122.2	17122.2	17122.2	17122.2	17122.2	17122.2		17122.2
539.942	21322	21322	21322	21322	21322	21322		21322			540.159	23532.6	23532.6	23532.6	23532.6	23532.6	23532.6		23532.6				539.665	17085	17085	17085	17085	17085	17085		17085
539.842	21087.6	21087.6	21087.6	21087.6	21087.6	21087.6		21087.6			540.059	23361.4	23361.4	23361.4	23361.4	23361.4	23361.4		23361.4				539.565	16698.1	16698.1	16698.1	16698.1	16698.1	16698.1		16698.1
539.742	21271.2	21271.2	21271.2	21271.2	21271.2	21271.2		21271.2			539.959	23500	23500	23500	23500	23500	23500		23500				539.465	16347.2	16347.2	16347.2	16347.2	16347.2	16347.2		16347.2
539.642	21007.8	21007.8	21007.8	21007.8	21007.8	21007.8		21007.8			539.859	23212.6	23212.6	23212.6	23212.6	23212.6	23212.6		23212.6				539.365	16210.6	16210.6	16210.6	16210.6	16210.6	16210.6		16210.6
539.542	21038.4	21038.4	21038.4	21038.4	21038.4	21038.4		21038.4			539.759	22983.6	22983.6	22983.6	22983.6	22983.6	22983.6		22983.6				539.265	16409.4	16409.4	16409.4	16409.4	16409.4	16409.4		16409.4
539.442	20768	20768	20768	20768	20768	20768		20768			539.659	22753.4	22753.4	22753.4	22753.4	22753.4	22753.4		22753.4				539.165	15995.2	15995.2	15995.2	15995.2	15995.2	15995.2		15995.2
539.342	20624	20624	20624	20624	20624	20624		20624			539.559	22496.4	22496.4	22496.4	22496.4	22496.4	22496.4		22496.4				539.065	15910.3	15910.3	15910.3	15910.3	15910.3	15910.3		15910.3
539.242	20061.2	20061.2	20061.2	20061.2	20061.2	20061.2		20061.2			539.459	22626.2	22626.2	22626.2	22626.2	22626.2	22626.2		22626.2				538.965	15991.1	15991.1	15991.1	15991.1	15991.1	15991.1		15991.1
539.142	20351.6	20351.6	20351.6	20351.6	20351.6	20351.6		20351.6			539.359	22161.8	22161.8	22161.8	22161.8	22161.8	22161.8		22161.8				538.865	16012.7	16012.7	16012.7	16012.7	16012.7	16012.7		16012.7
539.042	19945.1	19945.1	19945.1	19945.1	19945.1	19945.1		19945.1			539.259	22056.6	22056.6	22056.6	22056.6	22056.6	22056.6		22056.6				538.765	15702.9	15702.9	15702.9	15702.9	15702.9	15702.9		15702.9
538.942	19796.4	19796.4	19796.4	19796.4	19796.4	19796.4		19796.4			539.159	22152	22152	22152	22152	22152	22152		22152				538.665	15744.6	15744.6	15744.6	15744.6	15744.6	15744.6		15744.6
538.842	19822.3	19822.3	19822.3	19822.3	19822.3	19822.3		19822.3			539.059	21973	21973	21973	21973	21973	21973		21973				538.565	15698.2	15698.2	15698.2	15698.2	15698.2	15698.2		15698.2
538.742	19686.7	19686.7	19686.7	19686.7	19686.7	19686.7		19686.7			538.959	22315	22315	22315	22315	22315	22315		22315				538.465	15483.5	15483.5	15483.5	15483.5	15483.5	15483.5		15483.5
538.642	20068.6	20068.6	20068.6	20068.6	20068.6	20068.6		20068.6			538.859	22122.2	22122.2	22122.2	22122.2	22122.2	22122.2		22122.2				538.365	15469.1	15469.1	15469.1	15469.1	15469.1	15469.1		15469.1
538.542	19633.4	19633.4	19633.4	19633.4	19633.4	19633.4		19633.4			538.759	21906.2	21906.2	21906.2	21906.2	21906.2	21906.2		21906.2				538.265	15305.6	15305.6	15305.6	15305.6	15305.6	15305.6		15305.6
538.442	19710.9	19710.9	19710.9	19711	19710.9	19711		19710.9			538.659	21648.6	21648.6	21648.6	21648.6	21648.6	21648.6		21648.6				538.165	15135.2	15135.2	15135.2	15135.2	15135.2	15135.2		15135.2
538.342	19789.7	19789.7	19789.7	19789.8	19789.7	19789.8		19789.7			538.559	21504.8	21504.8	21504.8	21504.8	21504.8	21504.8		21504.8				538.065	15291.8	15291.8	15291.8	15291.9	15291.8	15291.9		15291.8
538.242	19784.4	19784.4	19784.4	19784.6	19784.4	19784.6		19784.4			538.459	21628.4	21628.4	21628.4	21628.5	21628.4	21628.5		21628.4				537.965	15278.1	15278.1	15278.1	15278.2	15278.1	15278.2		15278.1
538.142	19472.3	19472.3	19472.3	19472.5	19472.3	19472.5		19472.3			538.359	22002.2	22002.2	22002.2	22002.3	22002.2	22002.3		22002.2				537.865	15465.3	15465.3	15465.3	15465.5	15465.3	15465.5		15465.3
538.042	19900.6	19900.6	19900.6	19901	19900.6	19901		19900.6			538.259	21660	21660	21660	21660.1	21660	21660.1		21660				537.765	15571.3	15571.3	15571.3	15571.5	15571.3	15571.5		15571.3
537.942	19552.3	19552.3	19552.3	19552.9	19552.3	19552.9		19552.3			538.159	21560.2	21560.2	21560.2	21560.4	21560.2	21560.4		21560.2				537.665	15092.9	15092.9	15092.9	15093.2	15092.9	15093.2		15092.9
537.842	19885.2	19885.2	19885.2	19886	19885.2	19886		19885.2			538.059	21770.8	21770.8	21770.8	21771.1	21770.8	21771.1		21770.8				537.565	15120.7	15120.7	15120.7	15121.3	15120.7	15121.3		15120.7
537.742	19927.6	19927.6	19927.6	19928.9	19927.6	19928.9		19927.6			537.959	22107.8	22107.8	22107.8	22108.3	22107.8	22108.3		22107.8				537.465	15224.4	15224.4	15224.4	15225.3	15224.4	15225.3		15224.4
537.642	19901.2	19901.2	19901.2	19903.2	19901.2	19903.2		19901.2			537.859	22211.8	22211.8	22211.8	22212.6	22211.8	22212.6		22211.8				537.365	15272.8	15272.8	15272.8	15274.1	15272.8	15274.1		15272.8
537.542	20194	20194	20194	20197	20194	20197		20194			537.759	22301	22301	22301	22302.2	22301	22302.2		22301				537.265	15305.7	15305.7	15305.7	15307.8	15305.7	15307.8		15305.7
537.442	20062.6	20062.6	20062.6	20067.1	20062.6	20067.1		20062.6			537.659	22661.8	22661.8	22661.8	22663.5	22661.8	22663.5		22661.8				537.165	15219.6	15219.6	15219.6	15222.9	15219.6	15222.9		15219.6
537.342	20095.2	20095.2	20095.2	20101.8	20095.2	20101.8		20095.2			537.559	22337	22337	22337	22339.6	22337	22339.6		22337				537.065	15397.8	15397.8	15397.8	15402.7	15397.8	15402.7		15397.8
537.242	20375.2	20375.2	20375.2	20384.9	20375.2	20384.9		20375.2			537.459	22297.8	22297.8	22297.8	22301.7	22297.8	22301.7		22297.8				536.965	15662.9	15662.9	15662.9	15670.4	15662.9	15670.4		15662.9
537.142	20584.2	20584.2	20584.2	20598.4	20584.2	20598.4		20584.2			537.359	22386.4	22386.4	22386.4	22392.1	22386.4	22392.1		22386.4				536.865	15654.3	15654.3	15654.3	15665.5	15654.3	15665.5		15631.2
537.042	20867.2	20867.2	20867.2	20887.8	20867.2	20887.8		20867.2			537.259	22431.8	22431.8	22431.8	22440.1	22431.8	22440.1		22431.8				536.765	15599.6	15599.6	15599.6	15616.4	15599.6	15616.4		15668.8
536.942	20731	20731	20731	20760.5	20731	20760.5		20731			537.159	23059.2	23059.2	23059.2	23071.2	23059.2	23071.2		23059.2				536.665	15544.3	15544.3	15544.3	15569	15544.3	15569		15737.2
536.842	20946	20946	20946	20988.1	20946	20988.1		20857.4			537.059	22638.6	22638.6	22638.6	22655.7	22638.6	22655.7		22638.6				536.565	15488.3	15488.3	15488.3	15524.6	15488.3	15524.6		15902.1
536.742	20843.3	20843.3	20843.3	20902.8	20843.3	20902.8		21249.6			536.959	23316	23316	23316	23340.3	23316	23340.3		23316				536.465	15431.8	15431.8	15431.8	15484.4	15431.8	15484.4		15687.9
536.642	20739.5	20739.5	20739.5	20822.8	20739.5	20822.8		21357.8			536.859	23150.5	23150.5	23150.5	23184.8	23150.5	23184.8		23029.6				536.365	15374.6	15374.6	15374.6	15450.3	15374.6	15450.3		16209.4
536.542	20634.6	20634.6	20634.6	20750.3	20634.6	20750.3		21274.8			536.759	23057.6	23057.6	23057.6	23105.4	23057.6	23105.4		23106				536.265	15316.9	15316.9	15316.9	15424.7	15316.9	15424.7		16030.4
536.442	20528.6	20528.6	20528.6	20688	20528.6	20688		21556.2			536.659	22963.6	22963.6	22963.6	23029.8	22963.6	23029.8		23555.4				536.165	15258.6	15258.6	15258.6	15410.9	15258.6	15410.9		16301.7
536.342	20421.6	20421.6	20421.6	20639.2	20421.6	20639.2		21703.8			536.559	22868.6	22868.6	22868.6	22959.5	22868.6	22959.5		23264.8				536.065	15199.7	15199.7	15199.7	15413	15199.7	15413		16360
536.242	20313.5	20313.5	20313.5	20608.3	20313.5	20608.3		22366.4			536.459	22772.6	22772.6	22772.6	22896.3	22772.6	22896.3		23780				535.965	15140.3	15140.3	15140.3	15436.4	15140.3	15436.4		16373.1
536.142	20204.5	20204.5	20204.5	20600.4	20204.5	20600.4		22146.2			536.359	22675.6	22675.6	22675.6	22842.8	22675.6	22842.8		23575.2				535.865	15080.4	15080.4	15080.4	15487.6	15080.4	15487.7		16310.7
536.042	20094.5	20094.5	20094.5	20621.7	20094.5	20621.7		22219			536.259	22577.7	22577.7	22577.7	22801.8	22577.7	22801.8		23685.2				535.765	15019.9	15019.9	15020	15575.2	15019.9	15575.3		16863.3
535.942	19983.5	19983.5	19983.6	20679.7	19983.5	20679.8		22555.4			536.159	22478.7	22478.7	22478.8	22776.7	22478.7	22776.8		23684				535.665	14959	14959	14959.1	15709.4	14959	15709.6		16802.9
535.842	19871.7	19871.7	19871.8	20783.8	19871.7	20783.9		22877			536.059	22378.9	22378.9	22378.9	22771.6	22378.9	22771.7		23758.8				535.565	14897.5	14897.5	14897.8	15902.6	14897.5	15903		17230.2
535.742	19758.9	19758.9	19759.2	20944.5	19758.9	20944.7		22946.8			535.959	22278.1	22278.1	22278.2	22791.3	22278.1	22791.4		24087.4				535.465	14835.6	14835.6	14836.2	16169.8	14835.6	16170.4		17426
535.642	19645.3	19645.3	19645.8	21173	19645.3	21173.5		23260.4			535.859	22176.4	22176.4	22176.6	22841.3	22176.4	22841.5		23740.4				535.365	14773.2	14773.2	14774.3	16528.3	14773.2	16529.5		17554.3
535.542	19530.9	19530.9	19531.7	21482.3	19530.9	21483.1		23270.4			535.759	22073.8	22073.8	22074.3	22927.8	22073.8	22928.2		24156.6				535.265	14710.5	14710.4	14712.4	16998.3	14710.4	17000.3		18042.8
535.442	19415.7	19415.7	19417.1	21886.3	19415.7	21887.8		23489.2			535.659	21970.4	21970.4	21971.2	23057.6	21970.4	23058.4		24593.8				535.165	14647.3	14647.2	14650.8	17602.2	14647.2	17605.9		18600.5
535.342	19299.7	19299.7	19302.3	22399.9	19299.7	22402.5		24086			535.559	21866.2	21866.2	21867.6	23238.2	21866.2	23239.7		24456.8				535.065	14583.7	14583.6	14589.8	18365.1	14583.6	18371.5		19353.2
535.242	19182.9	19182.9	19187.5	23038.1	19182.9	23042.8		24466.6			535.459	21761.2	21761.1	21763.8	23477.2	21761.1	23479.9		24692				534.965	14519.9	14519.6	14530.1	19313.5	14519.6	19324.2		20301.8
535.142	19065.5	19065.5	19073.6	23815.6	19065.5	23823.8		25435.8			535.359	21655.5	21655.3	21660	23782.4	21655.3	23787.2		25028				534.865	14455.7	14455.4	14473.1	20474.7	14455.4	20492.8		21177.4
535.042	18947.4	18947.5	18961.4	24745.6	18947.4	24759.6		26229.6			535.259	21549	21548.8	21557	24161.1	21548.8	24169.6		25328.2				534.765	14391.4	14390.9	14420.1	21875.8	14390.8	21905.8		22176.2
534.942	18828.7	18828.9	18852.7	25838.9	18828.7	25863		26863.4			535.159	21441.8	21441.5	21455.7	24620.3	21441.5	24634.8		25591.2				534.665	14326.8	14326.1	14374	23541.7	14326	23590.7		24309.2
534.842	18709.5	18709.8	18749.5	27102.5	18709.5	27142.8		28161			535.059	21334	21333.6	21357.7	25166.2	21333.6	25190.8		25977.2				534.565	14262.3	14261.3	14338.2	25492.9	14261	25571.8		25504
534.742	18589.9	18590.4	18656	28538.1	18589.9	28604.9		29224.8			534.959	21225.7	21225	21265.4	25800.2	21225	25841.3		26697.8				534.465	14197.8	14196.5	14318.3	27743.3	14195.9	27868.3		27812.8
534.642	18469.8	18470.9	18577.5	30140.3	18469.8	30249.2		30316.2			534.859	21116.9	21115.9	21182.2	26521.7	21115.8	26589.3		27020.4				534.365	14133.5	14131.8	14322.2	30296.9	14130.6	30492.5		30236.6
534.542	18349.4	18351.4	18522	31896.6	18349.4	32071.3		31868.2			534.759	21007.7	21006.2	21114.4	27326.7	21006	27436.8		27589				534.265	14069.7	14067.7	14359.7	33144.7	14065.4	33445.6		33190.6
534.442	18228.7	18232.3	18501.9	33782.5	18228.7	34059.5		33882.4			534.659	20898.3	20896.1	21068.8	28206	20895.8	28381.8		28755.2				534.165	14006.5	14004.5	14447.8	36262.2	14000.2	36720.3		36244.2
534.342	18107.9	18114.4	18532.2	35761	18107.8	36192		36073.6			534.559	20788.8	20785.6	21058.9	29145.6	20785	29423.8		29439.2				534.065	13944.3	13943.1	14603	39605.2	13935.3	40289.9		39583
534.242	17987	17998.4	18640	37785.5	17986.9	38450.1		38207.8			534.459	20679.5	20675	21099.3	30125.4	20673.9	30557.6		30055.8				533.965	13883.6	13884.7	14856	43108.9	13870.5	44121.7		42777.6
534.142	17866.2	17885.9	18851.6	39799.1	17866.1	40804.6		39756.2			534.359	20570.7	20564.5	21214.8	31119.9	20562.4	31782.7		31331				533.865	13824.7	13831.4	15235.2	46687.6	13806.1	48160.7		47256
534.042	17745.5	17779	19216.3	41735.8	17745.3	43240.7		42296.6			534.259	20462.7	20454.6	21436.2	32098.1	20450.6	33099.8		32703.4				533.765	13768.5	13786.1	15786.1	50235.7	13742.1	52350		52350.6
533.942	17625.2	17681	19783	43524	17624.8	45738.8		44569.2			534.159	20356.2	20345.8	21803.8	33025.2	20338.6	34515.1		34152.4				533.665	13715.8	13753.9	16557.8	53631.4	13678.8	56622.7		56627.6
533.842	17505.2	17597.2	20626.3	45090	17504.6	48304.9		46935.2			534.059	20251.8	20239.3	22377.5	33863.5	20226.4	36052.7		35137.4				533.565	13667.6	13742.1	17606.1	56742.7	13616.1	60910.3		60430.8
533.742	17385.9	17535	21834.6	46363.4	17384.9	50964.2		49987.4			533.959	20150.3	20136.6	23214.9	34575.4	20114.2	37734.7		36489.4				533.465	13625.3	13761.5	19007.4	59435.5	13554.2	65167.2		65578.6
533.642	17267.3	17504.5	23503.8	47282	17265.7	53760.4		52925.6			533.859	20053.1	20040.5	24423	35124.7	20001.9	39635.7		38581.8				533.365	13590.6	13828.7	20813.5	61583.7	13493.2	69336.8		69665.2
533.542	17149.8	17521.2	25777.8	47797.1	17147.3	56804.1		56556.6			533.759	19961.6	19955	26079.7	35478.3	19889.8	41805.4		41290.8				533.265	13565.4	13966.2	23126.1	63080	13433.3	73437.8		73818
533.442	17033.6	17606.9	28757.2	47878.2	17029.7	60186.9		60196.2			533.659	19878.1	19886	28327.3	35617	19777.8	44375.1		44187.4				533.165	13552.3	14205	25976	63845.3	13374.5	77455.1		78446.4
533.342	16919.2	17788	32636.3	47515.1	16913.1	64119.3		64915.4			533.559	19805	19842.3	31281	35529	19666.1	47458.9		47458.8				533.065	13554.1	14586.6	29435.7	63836.7	13317	81462.3		81461.8
533.242	16807	18100.7	37503.7	46716	16797.7	68734.2		69908.2			533.459	19745.6	19836.2	35085.2	35213.3	19554.9	51215.5		51474.2				532.965	13574.3	15165	33507.7	63051.9	13260.8	85516.6		85933.6
533.142	16697.8	18598.8	43520.2	45514.4	16683.7	74279.8		75123.2			533.359	19703.9	19885.2	39885.1	34680.2	19444.4	55821.3		56144.4				532.865	13617.1	16007.1	38173.2	61529.2	13206	89708.5		90477.6
533.042	16592.4	19334.8	50748.6	43966.3	16571.4	80928		82136.6			533.259	19685	20012.6	45764.9	33950.2	19334.6	61408.7		62601.2				532.765	13687	17193.6	43358.3	59343.9	13152.9	94124.2		94617.8
532.942	16492	20376.7	59208.1	42136.1	16460.9	88830.3		89697			533.159	19694.9	20250.9	52856.3	33051.9	19226	68176.1		68785				532.665	13789.4	18816.3	48907.4	56600.4	13101.4	98809.4		98910.8
532.842	16398.1	21818.1	68850.3	40095.3	16352.5	98104.3		98345.8			533.059	19741.1	20639.8	61105.3	32020	19118.6	76150.4		77011.4				532.565	13930.1	20973.1	54613.8	53423.5	13051.7	103785		103481
532.742	16312.5	23740.5	79450.3	37918.2	16246.6	108682		109259			532.959	19832.2	21227.1	70499.7	30892.1	19012.8	85412.7		85971.4				532.465	14115.5	23769.4	60194.2	49946.7	13003.9	109014		107674
532.642	16238	26227.5	90726.7	35676.2	16143.6	120437		119889			532.859	19978.6	22069.6	80797.4	29706.5	18909	95825.1		96736				532.365	14351.9	27276.3	65302.3	46303	12958.2	114359		114052
532.542	16177.6	29373.6	102183	33434.7	16043.9	133038		132792			532.759	20191.9	23230.2	91700.9	28499.3	18807.5	107200		107391				532.265	14646.1	31536.8	69608.4	42615.9	12914.6	119664		119170
532.442	16135	33246.1	113227	31249.7	15947.9	146014		146675			532.659	20486.1	24773.5	102737	27303	18708.7	119173		118268				532.165	15004.5	36536.1	72768.6	38993.4	12873.2	124683		123754
532.342	16114.8	37855.2	123190	29166.8	15856.1	158759		157639			532.559	20877.7	26758.7	113338	26145.5	18613	131281		130833				532.065	15432.5	42178.8	74521.5	35523.9	12834.3	129154		128777
532.242	16122.6	43178.4	131364	27220.2	15768.9	170578		169225			532.459	21381.3	29231.1	122805	25049.5	18520.9	142904		142266				531.965	15934.9	48269.4	74739.8	32274.7	12798	132825		133445
532.142	16166	49130.6	137090	25433.3	15686.7	180759		179634			532.359	22013.7	32211.8	130544	24030.3	18432.8	153501		152130				531.865	16514.3	54503.8	73347.6	29292.4	12764.2	135365		135928
532.042	16251.1	55498.8	139960	23819.7	15610	188699		187726			532.259	22791.8	35664.1	135810	23098	18349	162316		162220				531.765	17169.7	60478.8	70535	26604.3	12733.2	136588		137134
531.942	16386.1	62008.8	139589	22386.2	15538.9	193753		194222			532.159	23732.2	39499.3	138310	22258.1	18270	168990		169002				531.665	17897.3	65721.3	66452.5	24221.6	12704.9	136178		136760
531.842	16579.5	68282.5	136171	21130.8	15473.8	195743		196658			532.059	24849.7	43560.3	137707	21512	18195.8	173041		173230				531.565	18689.4	69740.1	61481.3	22141.8	12679.4	134014		134887
531.742	16843	73890.3	129822	20044.2	15414.6	194356		194922			531.959	26156.2	47620.1	134115	20857.6	18126.8	174368		175293				531.465	19533.4	72140.6	55934	20352.3	12656.6	129990		129478
531.642	17183.5	78409.7	121195	19115.2	15361.5	189819		191057			531.859	27659.1	51394.1	127818	20290.5	18063	172972		173033				531.365	20412	72667	50166.6	18833.3	12636.4	124170		123752
531.542	17608.3	81421.8	110867	18330	15314.3	182284		183756			531.759	29360.2	54568.6	119296	19804.5	18004.4	169016		169288				531.265	21303	71260.7	44472	17560.2	12618.6	116740		116575
531.442	18123.2	82637.8	99571.6	17673.9	15272.7	172188		171535			531.659	31253.3	56832.1	109240	19392.3	17950.8	162866		162733				531.165	22179.8	68072.3	39095.8	16506.1	12603.1	108045		107422
531.342	18733.2	81975.9	87970.9	17131.3	15236.3	160102		160099			531.559	33324.8	57947.5	98274.3	19046	17902	154887		155383				531.065	23012.2	63430.2	34186.2	15643.5	12589.8	98502.8		98376.8
531.242	19437.2	79478.3	76651.2	16687.2	15204.8	146640		146045			531.459	35546.5	57798.6	87077.4	18757.6	17857.7	145607		145706				530.965	23768.6	57777.3	29873	14945.5	12578.4	88629.2		87798.4
531.142	20226.7	75338.5	66026.2	16327.2	15177.7	132386		131605			531.359	37876.9	56397.4	76191.1	18519.4	17817.8	135531		135390				530.865	24416.9	51594.1	26158.5	14386.7	12568.6	78850.2		79050
531.042	21088.7	69971.8	56458.4	16038.2	15154.5	118094		117008			531.259	40264.2	53887.7	66019.9	18324.2	17781.8	125151		125018				530.765	24927.8	45330.7	23066.2	13944.1	12560.4	69587.7		69950.6
530.942	22003.4	63793.1	48045.1	15808.2	15134.7	104246		103427			531.159	42645.3	50515.9	56853.4	18165.5	17749.3	114932		114315				530.665	25276.9	39358.5	20534.7	13597	12553.4	61107		61658.8
530.842	22942.4	57228.1	40895.4	15626.9	15117.8	91339.2		91536.2			531.059	44947	46586	48845.4	18036.7	17720.1	105255		104488				530.565	25446.4	33933.6	18513.8	13327.6	12547.5	53578.9		54100.6
530.742	23869	50688	34942.4	15484.9	15103.6	79673.6		79940.8			530.959	47089.7	42409.9	42017.3	17932.6	17693.8	96368.1		96438.4				530.465	25427.3	29204.5	16934	13120.4	12542.5	47058.7		47144.2
530.642	24742.8	44477.3	30106.4	15375	15091.5	69427.2		70014.2			530.859	48991.5	38270.7	36376.9	17848.8	17670.1	88477.4		88684.4				530.365	25220.2	25227.6	15716.1	12962.6	12538.3	41511.7		41773.2
530.542	25520.9	38829.1	26269.9	15290.5	15081.2	60666.7		60662.2			530.759	50573.2	34387.3	31775.2	17781.3	17648.8	81570.5		81104.2				530.265	24834.8	21989.3	14804.5	12843.5	12534.8	36867.9		36959.2
530.442	26154.1	33875.1	23265.8	15225.6	15072.5	53303		53854.4			530.659	51764.7	30904.1	28148.5	17727.1	17629.7	75655.4		75796.6				530.165	24287.9	19428.2	14123.7	12754.5	12531.8	32999.1		33350
530.342	26607	29652.2	20987	15176.2	15065.1	47227.1		47758			530.559	52509.8	27898.5	25308.7	17683.5	17612.5	70563.2		71440.8				530.065	23606.7	17456.9	13633	12688.5	12529.2	29797.4		29470.8
530.242	26852.6	26158.2	19262.3	15138.7	15058.8	42235.5		42732.2			530.459	52760.9	25391.9	23147.5	17648.4	17597	66157.7		66686.4				529.965	22821.3	15977.5	13278.9	12639.9	12527	27136.4		27135.6
530.142	26875	23354.2	18000.6	15110.4	15053.4	38180		38889			530.359	52513.4	23364.7	21523.8	17620.1	17583.3	62272.2		62866.6				529.865	21963.5	14896.9	13030.6	12604.5	12525.2	24919.9		24605.4
530.042	26667.3	21141.1	17080.2	15089.2	15048.8	34831.4		35032.4			530.259	51780.7	21770.5	20324.7	17597.2	17571	58760		59035				529.765	21064.8	14123.2	12858.3	12578.8	12523.6	23054.2		22955.4
529.942	26242.1	19433.3	16425.7	15073.2	15044.9	32039.6		31809.8			530.159	50597.3	20551.4	19459.1	17578.6	17560.2	55506		55377.4				529.665	20154.5	13580.6	12740.3	12560.4	12522.3	21469		21029
529.842	25631.5	18156.2	15966.4	15061.2	15041.5	29690.7		29611.4			530.059	49017.1	19641.3	18836.3	17563.5	17550.6	52406.5		51971.4				529.565	19258.4	13208.1	12661.5	12547.2	12521.1	20111.8		19655.1
529.742	24871	17210.3	15647.9	15052.2	15038.7	27665.5		27311.4			529.959	47108.8	18975.5	18404.1	17551.1	17542.1	49413.1		49672.8				529.465	18397.7	12957.7	12608.8	12537.8	12520.2	18941.5		18590
529.642	24001.6	16522.9	15433	15045.5	15036.2	25894.4		25065.2			529.859	44950.5	18498.8	18101.7	17541	17534.8	46487.5		46424.4				529.365	17588.8	12792.7	12574.8	12531.2	12519.3	17929.5		17378.9
529.542	23065.7	16036.7	15287.5	15040.4	15034.1	24328.1		23742.6			529.759	42623.7	18164.5	17897.1	17532.6	17528.4	43632.7		43498.2				529.265	16843.1	12686.2	12552.6	12526.5	12518.6	17052.7		17267
529.442	22108.3	15697.8	15192.7	15036.5	15032.2	22938.6		22408.6			529.659	40208.2	17934.7	17758.6	17525.8	17522.9	40858.6		40946.6				529.165	16167.9	12618.8	12538.6	12523.1	12517.9	16294.6		16398
529.342	21164.8	15464.4	15130.3	15033.5	15030.7	21701		21470.4			529.559	37777.4	17779.8	17666.8	17520.1	17518.2	38189.4		37840.6				529.065	15566.2	12576.9	12529.7	12520.8	12517.4	15641.4		15891.4
529.242	20264.1	15307.4	15090.5	15031.2	15029.3	20605.2		20459.6			529.459	35395.6	17677.2	17606.6	17515.5	17514.2	35652.3		35306.4				528.965	15038	12551.5	12524.1	12519.1	12516.9	15082.1		15228.4
529.142	19430.6	15204	15065	15029.3	15028.1	19644.7		19546.4			529.359	33118.3	17610.8	17567.2	17511.6	17510.8	33275.6		32599				528.865	14580.9	12536.2	12520.7	12517.9	12516.5	14606.2		14745
529.042	18677.3	15136.3	15049	15027.9	15027.1	18809.3		18807.3			529.259	30983.8	17568.1	17542	17508.4	17507.9	31078.7		30391.8				528.765	14190.3	12527.1	12518.5	12517	12516.1	14204.6		14493.7
528.942	18010.6	15092.7	15039.1	15026.7	15026.2	18090.6		18052.2			529.159	29019.1	17541	17525.6	17505.7	17505.4	29075.2		28309.6				528.665	13860.8	12521.8	12517.1	12516.4	12515.8	13868.8		13795.7
528.842	17432.1	15065.5	15032.8	15025.7	15025.4	17480		17838.1			529.059	27240.5	17523.9	17515.2	17503.5	17503.3	27273.3		26793.6				528.565	13586.1	12518.7	12516.2	12515.8	12515.5	13590.4		14240.4
528.742	16940.9	15048.4	15028.9	15024.9	15024.6	16969.1		17522.3			528.959	25655	17513.2	17508.3	17501.6	17501.5	25673.7		25534.4				528.465	13359.7	12516.9	12515.6	12515.4	12515.2	13362.1		14199.7
528.642	16531.8	15037.8	15026.4	15024.1	15024	16548.1		17145.4			528.859	24261.4	17506.5	17503.8	17500	17499.9	24272		24607.8				528.365	13175.6	12515.9	12515.2	12515.1	12515	13176.9		13538.1
528.542	16194.9	15031.4	15024.8	15023.5	15023.5	16204.2		17040.6			528.759	23052.8	17502.2	17500.8	17498.7	17498.7	23058.7		23754.8				528.265	13027	12515.2	12514.9	12514.9	12514.8	13027.7		13369.2
528.442	15921.6	15027.4	15023.7	15023	15023	15926.8		16917.5			528.659	22017.8	17499.5	17498.8	17497.6	17497.6	22021		22681.8				528.165	12908.4	12514.8	12514.7	12514.7	12514.6	12908.7		13227.1
528.342	15703.3	15025	15022.9	15022.6	15022.5	15706.2		16280.3			528.559	21142	17497.7	17497.3	17496.7	17496.7	21143.7		21773.6				528.065	12814.5	12514.6	12514.5	12514.5	12514.5	12814.6		13271.9
528.242	15533	15023.5	15022.4	15022.2	15022.1	15534.6		16683.3			528.459	20409.3	17496.5	17496.3	17495.9	17495.9	20410.2		21134.6				527.965	12741	12514.4	12514.3	12514.3	12514.3	12741		13307.6
528.142	15400.6	15022.5	15021.9	15021.8	15021.8	15401.4		16490.9			528.359	19804.4	17495.6	17495.5	17495.3	17495.3	19804.9		20720				527.865	12683.9	12514.2	12514.2	12514.2	12514.2	12684		13229.8
528.042	15298.9	15021.9	15021.6	15021.5	15021.5	15299.4		16144.1			528.259	19310.3	17494.9	17494.9	17494.8	17494.8	19310.5		20287.2				527.765	12640.1	12514.1	12514.1	12514.1	12514	12640.1		13193.2
527.942	15221.9	15021.5	15021.3	15021.3	15021.3	15222.2		16005			528.159	18909.6	17494.4	17494.4	17494.3	17494.3	18909.8		19873.5				527.665	12606.8	12514	12514	12514	12514	12606.8		12941.8
527.842	15164.9	15021.2	15021.1	15021.1	15021.1	15165		15856.7			528.059	18588	17494	17494	17494	17494	18588		19480				527.565	12581.6	12513.9	12513.9	12513.9	12513.9	12581.6		12962.4
527.742	15122.8	15021	15020.9	15020.9	15020.9	15122.9		15627.1			527.959	18332.2	17493.7	17493.7	17493.7	17493.7	18332.2		19343.1				527.465	12562.8	12513.8	12513.8	12513.8	12513.8	12562.8		13025.7
527.642	15092.1	15020.8	15020.7	15020.7	15020.7	15092.2		15627.4			527.859	18130.7	17493.5	17493.5	17493.5	17493.5	18130.8		18997.6				527.365	12548.9	12513.7	12513.7	12513.7	12513.7	12548.9		12872.8
527.542	15070	15020.6	15020.6	15020.6	15020.6	15070		15641.9			527.759	17973.6	17493.3	17493.3	17493.3	17493.3	17973.6		18590.1				527.265	12538.7	12513.6	12513.6	12513.6	12513.6	12538.7		12774.5
527.442	15054.3	15020.5	15020.5	15020.5	15020.5	15054.3		15643.9			527.659	17852.1	17493.2	17493.2	17493.2	17493.2	17852.1		18303.9				527.165	12531.3	12513.6	12513.6	12513.6	12513.6	12531.3		12852.7
527.342	15043.3	15020.4	15020.4	15020.4	15020.4	15043.3		15335.8			527.559	17759.1	17493.1	17493.1	17493.1	17493.1	17759.1		18296.6				527.065	12525.9	12513.5	12513.5	12513.5	12513.5	12525.9		12816
527.242	15035.6	15020.3	15020.3	15020.3	15020.3	15035.6		15101.3			527.459	17688.5	17493	17493	17493	17493	17688.5		17984.5				526.965	12522.1	12513.5	12513.5	12513.5	12513.5	12522.1		12714.1
527.142	15030.4	15020.2	15020.2	15020.2	15020.2	15030.4		15259.8			527.359	17635.4	17493	17493	17493	17493	17635.4		17959.2				526.865	12519.4	12513.5	12513.5	12513.5	12513.5	12519.4		12873.5
527.042	15026.8	15020.1	15020.1	15020.1	15020.1	15026.8		15353.3			527.259	17596	17492.9	17492.9	17492.9	17492.9	17596		17679.1				526.765	12517.5	12513.4	12513.4	12513.4	12513.4	12517.5		12776
526.942	15024.4	15020	15020	15020	15020	15024.4		15202.6			527.159	17567	17492.9	17492.9	17492.9	17492.9	17567		17691.6				526.665	12516.1	12513.4	12513.4	12513.4	12513.4	12516.1		12636.6
526.842	15022.8	15020	15020	15020	15020	15022.8		15481.4			527.059	17545.6	17492.9	17492.9	17492.9	17492.9	17545.6		17514.3				526.565	12515.2	12513.4	12513.4	12513.4	12513.4	12515.2		12668.4
526.742	15021.7	15019.9	15019.9	15019.9	15019.9	15021.7		15252.8			526.959	17530.1	17492.8	17492.8	17492.8	17492.8	17530.1		17764.8				526.465	12514.6	12513.4	12513.4	12513.4	12513.4	12514.6		12628.1
526.642	15021	15019.9	15019.9	15019.9	15019.9	15021		15312.6			526.859	17518.9	17492.8	17492.8	17492.8	17492.8	17518.9		17681.1				526.365	12514.2	12513.4	12513.4	12513.4	12513.4	12514.2		12446.3
526.542	15020.5	15019.9	15019.9	15019.9	15019.9	15020.5		15116.4			526.759	17510.9	17492.8	17492.8	17492.8	17492.8	17510.9		17543.5				526.265	12513.9	12513.4	12513.4	12513.4	12513.4	12513.9		12594.1
526.442	15020.3	15019.8	15019.8	15019.8	15019.8	15020.3		15063.7			526.659	17505.3	17492.8	17492.8	17492.8	17492.8	17505.3		17462				526.165	12513.7	12513.3	12513.3	12513.3	12513.3	12513.7		12504.4
526.342	15020.1	15019.8	15019.8	15019.8	15019.8	15020.1		14922.7			526.559	17501.3	17492.8	17492.8	17492.8	17492.8	17501.3		17570.2				526.065	12513.5	12513.3	12513.3	12513.3	12513.3	12513.5		12641.6
526.242	15019.9	15019.8	15019.8	15019.8	15019.8	15019.9		15005.9			526.459	17498.5	17492.8	17492.8	17492.8	17492.8	17498.5		17395.1				525.965	12513.5	12513.3	12513.3	12513.3	12513.3	12513.5		12492
526.142	15019.9	15019.8	15019.8	15019.8	15019.8	15019.9		15018.6			526.359	17496.6	17492.8	17492.8	17492.8	17492.8	17496.6		16938.9				525.865	12513.4	12513.3	12513.3	12513.3	12513.3	12513.4		12776.6
526.042	15019.8	15019.7	15019.7	15019.7	15019.7	15019.8		15206.4			526.259	17495.3	17492.8	17492.8	17492.8	17492.8	17495.3		17483.6				525.765	12513.4	12513.3	12513.3	12513.3	12513.3	12513.4		12666.2
525.942	15019.8	15019.7	15019.7	15019.7	15019.7	15019.8		15223.8			526.159	17494.5	17492.7	17492.7	17492.7	17492.7	17494.5		17369.6				525.665	12513.3	12513.3	12513.3	12513.3	12513.3	12513.3		12504.7
525.842	15019.7	15019.7	15019.7	15019.7	15019.7	15019.7		15020.2			526.059	17493.9	17492.7	17492.7	17492.7	17492.7	17493.9		17627.7				525.565	12513.3	12513.3	12513.3	12513.3	12513.3	12513.3		12505.4
525.742	15019.7	15019.7	15019.7	15019.7	15019.7	15019.7		15061.2			525.959	17493.5	17492.7	17492.7	17492.7	17492.7	17493.5		17466.2				525.465	12513.3	12513.3	12513.3	12513.3	12513.3	12513.3		12406.9
525.642	15019.7	15019.7	15019.7	15019.7	15019.7	15019.7		15152			525.859	17493.2	17492.7	17492.7	17492.7	17492.7	17493.2		17199.1				525.365	12513.3	12513.3	12513.3	12513.3	12513.3	12513.3		12513.4
525.542	15019.7	15019.7	15019.7	15019.7	15019.7	15019.7		15120.7			525.759	17493	17492.7	17492.7	17492.7	17492.7	17493		17340				525.265	12619.7	12619.7	12619.7	12619.7	12619.7	12619.7		12619.7
525.442	15019.7	15019.7	15019.7	15019.7	15019.7	15019.7		15066.8			525.659	17492.9	17492.7	17492.7	17492.7	17492.7	17492.9		17244.9				525.165	12490.2	12490.2	12490.2	12490.2	12490.2	12490.2		12490.2
525.342	15019.7	15019.7	15019.7	15019.7	15019.7	15019.7		15028.3			525.559	17492.8	17492.7	17492.7	17492.7	17492.7	17492.8		16998				525.065	12707.2	12707.2	12707.2	12707.2	12707.2	12707.2		12707.2
525.242	14964	14964	14964	14964	14964	14964		14964			525.459	17492.8	17492.7	17492.7	17492.7	17492.7	17492.8		17614.1				524.965	12594.8	12594.8	12594.8	12594.8	12594.8	12594.8		12594.8
525.142	15161.3	15161.3	15161.3	15161.3	15161.3	15161.3		15161.3			525.359	17492.8	17492.7	17492.7	17492.7	17492.7	17492.8		17468.1				524.865	12317.5	12317.5	12317.5	12317.5	12317.5	12317.5		12317.5
525.042	15154.2	15154.2	15154.2	15154.2	15154.2	15154.2		15154.2			525.259	17396	17395.9	17395.9	17395.9	17395.9	17396		17395.9				524.765	12727.7	12727.7	12727.7	12727.7	12727.7	12727.7		12727.7
524.942	15204.2	15204.2	15204.2	15204.2	15204.2	15204.2		15204.2			525.159	17117.8	17117.7	17117.7	17117.7	17117.7	17117.8		17117.7				524.665	12402.4	12402.4	12402.4	12402.4	12402.4	12402.4		12402.4
524.842	15100.6	15100.6	15100.6	15100.6	15100.6	15100.6		15100.6			525.059	17338.1	17338.1	17338.1	17338.1	17338.1	17338.1		17338.1				524.565	12399.6	12399.6	12399.6	12399.6	12399.6	12399.6		12399.6
524.742	15424	15424	15424	15424	15424	15424		15424			524.959	17378.8	17378.8	17378.8	17378.8	17378.8	17378.8		17378.8				524.465	12775.3	12775.3	12775.3	12775.3	12775.3	12775.3		12775.3
524.642	15198.7	15198.7	15198.7	15198.7	15198.7	15198.7		15198.7			524.859	17526.1	17526.1	17526.1	17526.1	17526.1	17526.1		17526.1				524.365	12770.1	12770.1	12770.1	12770.1	12770.1	12770.1		12770.1
524.542	14987.9	14987.9	14987.9	14987.9	14987.9	14987.9		14987.9			524.759	17305.1	17305.1	17305.1	17305.1	17305.1	17305.1		17305.1				524.265	12676.8	12676.8	12676.8	12676.8	12676.8	12676.8		12676.8
524.442	15236.5	15236.5	15236.5	15236.5	15236.5	15236.5		15236.5			524.659	17303.6	17303.6	17303.6	17303.6	17303.6	17303.6		17303.6				524.165	12241	12241	12241	12241	12241	12241		12241
524.342	14989.3	14989.3	14989.3	14989.3	14989.3	14989.3		14989.3			524.559	17434.5	17434.5	17434.5	17434.5	17434.5	17434.5		17434.5				524.065	12516	12516	12516	12516	12516	12516		12516
524.242	15539.3	15539.3	15539.3	15539.3	15539.3	15539.3		15539.3			524.459	17909.4	17909.4	17909.4	17909.4	17909.4	17909.4		17909.4				523.965	12649.5	12649.5	12649.5	12649.5	12649.5	12649.5		12649.5
524.142	14985.9	14985.9	14985.9	14985.9	14985.9	14985.9		14985.9			524.359	17438.2	17438.2	17438.2	17438.2	17438.2	17438.2		17438.2				523.865	12845.5	12845.5	12845.5	12845.5	12845.5	12845.5		12845.5
524.042	15375.6	15375.6	15375.6	15375.6	15375.6	15375.6		15375.6			524.259	17479.9	17479.9	17479.9	17479.9	17479.9	17479.9		17479.9				523.765	12551.5	12551.5	12551.5	12551.5	12551.5	12551.5		12551.5
523.942	15374	15374	15374	15374	15374	15374		15374			524.159	17408.5	17408.5	17408.5	17408.5	17408.5	17408.5		17408.5				523.665	12709.7	12709.7	12709.7	12709.7	12709.7	12709.7		12709.7
523.842	15288.3	15288.3	15288.3	15288.3	15288.3	15288.3		15288.3			524.059	17815.3	17815.3	17815.3	17815.3	17815.3	17815.3		17815.3				523.565	12156.6	12156.6	12156.6	12156.6	12156.6	12156.6		12156.6
523.742	15542.7	15542.7	15542.7	15542.7	15542.7	15542.7		15542.7			523.959	17720.8	17720.8	17720.8	17720.8	17720.8	17720.8		17720.8				523.465	12492.2	12492.2	12492.2	12492.2	12492.2	12492.2		12492.2
523.642	15258.1	15258.1	15258.1	15258.1	15258.1	15258.1		15258.1			523.859	17306.9	17306.9	17306.9	17306.9	17306.9	17306.9		17306.9				523.365	12547.1	12547.1	12547.1	12547.1	12547.1	12547.1		12547.1
523.542	15119.1	15119.1	15119.1	15119.1	15119.1	15119.1		15119.1			523.759	17203.7	17203.7	17203.7	17203.7	17203.7	17203.7		17203.7				523.265	12379.5	12379.5	12379.5	12379.5	12379.5	12379.5		12379.5
523.442	15035.5	15035.5	15035.5	15035.5	15035.5	15035.5		15035.5			523.659	17127.4	17127.4	17127.4	17127.4	17127.4	17127.4		17127.4				523.165	12220.2	12220.2	12220.2	12220.2	12220.2	12220.2		12220.2
523.342	14933.4	14933.4	14933.4	14933.4	14933.4	14933.4		14933.4			523.559	17171.8	17171.8	17171.8	17171.8	17171.8	17171.8		17171.8				523.065	12162.5	12162.5	12162.5	12162.5	12162.5	12162.5		12162.5
523.242	14956.4	14956.4	14956.4	14956.4	14956.4	14956.4		14956.4			523.459	17273.9	17273.9	17273.9	17273.9	17273.9	17273.9		17273.9				522.965	12145.4	12145.4	12145.4	12145.4	12145.4	12145.4		12145.4
523.142	15069.4	15069.4	15069.4	15069.4	15069.4	15069.4		15069.4			523.359	17493.4	17493.4	17493.4	17493.4	17493.4	17493.4		17493.4				522.865	12324.2	12324.2	12324.2	12324.2	12324.2	12324.2		12324.2
523.042	15030.4	15030.4	15030.4	15030.4	15030.4	15030.4		15030.4			523.259	16997.8	16997.8	16997.8	16997.8	16997.8	16997.8		16997.8				522.765	12388.9	12388.9	12388.9	12388.9	12388.9	12388.9		12388.9
522.942	14667	14667	14667	14667	14667	14667		14667			523.159	17037.4	17037.4	17037.4	17037.4	17037.4	17037.4		17037.4				522.665	12099.8	12099.8	12099.8	12099.8	12099.8	12099.8		12099.8
522.842	14563.9	14563.9	14563.9	14563.9	14563.9	14563.9		14563.9			523.059	17354	17354	17354	17354	17354	17354		17354				522.565	12248.5	12248.5	12248.5	12248.5	12248.5	12248.5		12248.5
522.742	14780.5	14780.5	14780.5	14780.5	14780.5	14780.5		14780.5			522.959	16632.2	16632.2	16632.2	16632.2	16632.2	16632.2		16632.2				522.465	12169.8	12169.8	12169.8	12169.8	12169.8	12169.8		12169.8
522.642	14684.8	14684.8	14684.8	14684.8	14684.8	14684.8		14684.8			522.859	16903.8	16903.8	16903.8	16903.8	16903.8	16903.8		16903.8				522.365	12190.8	12190.8	12190.8	12190.8	12190.8	12190.8		12190.8
522.542	14720.2	14720.2	14720.2	14720.2	14720.2	14720.2		14720.2			522.759	17129.4	17129.4	17129.4	17129.4	17129.4	17129.4		17129.4				522.265	12045.8	12045.8	12045.8	12045.8	12045.8	12045.8		12045.8
522.442	14668.6	14668.6	14668.6	14668.6	14668.6	14668.6		14668.6			522.659	16918.8	16918.8	16918.8	16918.8	16918.8	16918.8		16918.8				522.165	12150	12150	12150	12150	12150	12150		12150
522.342	14427	14427	14427	14427	14427	14427		14427			522.559	16814.9	16814.9	16814.9	16814.9	16814.9	16814.9		16814.9				522.065	11981.6	11981.6	11981.6	11981.6	11981.6	11981.6		11981.6
522.242	14580.1	14580.1	14580.1	14580.1	14580.1	14580.1		14580.1			522.459	16864	16864	16864	16864	16864	16864		16864				521.965	12045	12045	12045	12045	12045	12045		12045
522.142	14548.9	14548.9	14548.9	14548.9	14548.9	14548.9		14548.9			522.359	16920.8	16920.8	16920.8	16920.8	16920.8	16920.8		16920.8				521.865	12041	12041	12041	12041	12041	12041		12041
522.042	14397.7	14397.7	14397.7	14397.7	14397.7	14397.7		14397.7			522.259	17283.2	17283.2	17283.2	17283.2	17283.2	17283.2		17283.2				521.765	12041.9	12041.9	12041.9	12041.9	12041.9	12041.9		12041.9
521.942	14506.6	14506.6	14506.6	14506.6	14506.6	14506.6		14506.6			522.159	16824.1	16824.1	16824.1	16824.1	16824.1	16824.1		16824.1				521.665	12235.4	12235.4	12235.4	12235.4	12235.4	12235.4		12235.4
521.842	14417.9	14417.9	14417.9	14417.9	14417.9	14417.9		14417.9			522.059	16711.1	16711.1	16711.1	16711.1	16711.1	16711.1		16711.1				521.565	12345.8	12345.8	12345.8	12345.8	12345.8	12345.8		12345.8
521.742	14555.5	14555.5	14555.5	14555.5	14555.5	14555.5		14555.5			521.959	16664.5	16664.5	16664.5	16664.5	16664.5	16664.5		16664.5				521.465	12331	12331	12331	12331	12331	12331		12331
521.642	14602.8	14602.8	14602.8	14602.8	14602.8	14602.8		14602.8			521.859	16796.9	16796.9	16796.9	16796.9	16796.9	16796.9		16796.9				521.365	12132.2	12132.2	12132.2	12132.2	12132.2	12132.2		12132.2
521.542	14399	14399	14399	14399	14399	14399		14399			521.759	16818.2	16818.2	16818.2	16818.2	16818.2	16818.2		16818.2				521.265	12098.7	12098.7	12098.7	12098.7	12098.7	12098.7		12098.7
521.442	14327.1	14327.1	14327.1	14327.1	14327.1	14327.1		14327.1			521.659	16754.3	16754.3	16754.3	16754.3	16754.3	16754.3		16754.3				521.165	12026.2	12026.2	12026.2	12026.2	12026.2	12026.2		12026.2
521.342	14267.1	14267.1	14267.1	14267.1	14267.1	14267.1		14267.1			521.559	16908	16908	16908	16908	16908	16908		16908				521.065	11711.1	11711.1	11711.1	11711.1	11711.1	11711.1		11711.1
521.242	14482.9	14482.9	14482.9	14482.9	14482.9	14482.9		14482.9			521.459	16912.7	16912.7	16912.7	16912.7	16912.7	16912.7		16912.7				520.965	11821.9	11821.9	11821.9	11821.9	11821.9	11821.9		11821.9
521.142	14550.8	14550.8	14550.8	14550.8	14550.8	14550.8		14550.8			521.359	16838.4	16838.4	16838.4	16838.4	16838.4	16838.4		16838.4				520.865	12045.6	12045.6	12045.6	12045.6	12045.6	12045.6		12045.6
521.042	14551.8	14551.8	14551.8	14551.8	14551.8	14551.8		14551.8			521.259	16907.9	16907.9	16907.9	16907.9	16907.9	16907.9		16907.9				520.765	12296.5	12296.5	12296.5	12296.5	12296.5	12296.5		12296.5
520.942	14692.7	14692.7	14692.7	14692.7	14692.7	14692.7		14692.7			521.159	16510.9	16510.9	16510.9	16510.9	16510.9	16510.9		16510.9				520.665	11943.4	11943.4	11943.4	11943.4	11943.4	11943.4		11943.4
520.842	14666.1	14666.1	14666.1	14666.1	14666.1	14666.1		14666.1			521.059	16548.2	16548.2	16548.2	16548.2	16548.2	16548.2		16548.2				520.565	12208.9	12208.9	12208.9	12208.9	12208.9	12208.9		12208.9
520.742	14557.5	14557.5	14557.5	14557.5	14557.5	14557.5		14557.5			520.959	16569.2	16569.2	16569.2	16569.2	16569.2	16569.2		16569.2				520.465	12289.5	12289.5	12289.5	12289.5	12289.5	12289.5		12289.5
520.642	14669.6	14669.6	14669.6	14669.6	14669.6	14669.6		14669.6			520.859	16448.7	16448.7	16448.7	16448.7	16448.7	16448.7		16448.7				520.365	12132.7	12132.7	12132.7	12132.7	12132.7	12132.7		12132.7
520.542	14589.1	14589.1	14589.1	14589.1	14589.1	14589.1		14589.1			520.759	16799.7	16799.7	16799.7	16799.7	16799.7	16799.7		16799.7				520.265	11971.1	11971.1	11971.1	11971.1	11971.1	11971.1		11971.1
520.442	14366.5	14366.5	14366.5	14366.5	14366.5	14366.5		14366.5			520.659	16639.1	16639.1	16639.1	16639.1	16639.1	16639.1		16639.1				520.165	11968.4	11968.4	11968.4	11968.4	11968.4	11968.4		11968.4
520.342	14294.3	14294.3	14294.3	14294.3	14294.3	14294.3		14294.3			520.559	16631	16631	16631	16631	16631	16631		16631				520.065	11908.4	11908.4	11908.4	11908.4	11908.4	11908.4		11908.4
520.242	14641.5	14641.5	14641.5	14641.5	14641.5	14641.5		14641.5			520.459	16679.8	16679.8	16679.8	16679.8	16679.8	16679.8		16679.8				519.965	12156.5	12156.5	12156.5	12156.5	12156.5	12156.5		12156.5
520.142	14304.8	14304.8	14304.8	14304.8	14304.8	14304.8		14304.8			520.359	16740	16740	16740	16740	16740	16740		16740				519.865	11970	11970	11970	11970	11970	11970		11970
520.042	14277.7	14277.7	14277.7	14277.7	14277.7	14277.7		14277.7			520.259	16676.1	16676.1	16676.1	16676.1	16676.1	16676.1		16676.1				519.765	12064.3	12064.3	12064.3	12064.3	12064.3	12064.3		12064.3
519.942	14400.6	14400.6	14400.6	14400.6	14400.6	14400.6		14400.6			520.159	16682.3	16682.3	16682.3	16682.3	16682.3	16682.3		16682.3				519.665	11882.6	11882.6	11882.6	11882.6	11882.6	11882.6		11882.6
519.842	14329.7	14329.7	14329.7	14329.7	14329.7	14329.7		14329.7			520.059	16732.5	16732.5	16732.5	16732.5	16732.5	16732.5		16732.5				519.565	12084.3	12084.3	12084.3	12084.3	12084.3	12084.3		12084.3
519.742	14439.6	14439.6	14439.6	14439.6	14439.6	14439.6		14439.6			519.959	16575.5	16575.5	16575.5	16575.5	16575.5	16575.5		16575.5				519.465	12238.6	12238.6	12238.6	12238.6	12238.6	12238.6		12238.6
519.642	14489.3	14489.3	14489.3	14489.3	14489.3	14489.3		14489.3			519.859	16531.2	16531.2	16531.2	16531.2	16531.2	16531.2		16531.2				519.365	12322.7	12322.7	12322.7	12322.7	12322.7	12322.7		12322.7
519.542	14428.1	14428.1	14428.1	14428.1	14428.1	14428.1		14428.1			519.759	16483.8	16483.8	16483.8	16483.8	16483.8	16483.8		16483.8				519.265	11913.2	11913.2	11913.2	11913.2	11913.2	11913.2		11913.2
519.442	14331.1	14331.1	14331.1	14331.1	14331.1	14331.1		14331.1			519.659	16741.1	16741.1	16741.1	16741.1	16741.1	16741.1		16741.1				519.165	11836.8	11836.8	11836.8	11836.8	11836.8	11836.8		11836.8
519.342	14512.9	14512.9	14512.9	14512.9	14512.9	14512.9		14512.9			519.559	16668.5	16668.5	16668.5	16668.5	16668.5	16668.5		16668.5				519.065	12015.9	12015.9	12015.9	12015.9	12015.9	12015.9		12015.9
519.242	14376.4	14376.4	14376.4	14376.4	14376.4	14376.4		14376.4			519.459	16836.1	16836.1	16836.1	16836.1	16836.1	16836.1		16836.1				518.965	12024.2	12024.2	12024.2	12024.2	12024.2	12024.2		12024.2
519.142	14632.2	14632.2	14632.2	14632.2	14632.2	14632.2		14632.2			519.359	16477.8	16477.8	16477.8	16477.8	16477.8	16477.8		16477.8				518.865	12285.3	12285.3	12285.3	12285.3	12285.3	12285.3		12285.3
519.042	14432.2	14432.2	14432.2	14432.2	14432.2	14432.2		14432.2			519.259	16653.3	16653.3	16653.3	16653.3	16653.3	16653.3		16653.3				518.765	11873	11873	11873	11873	11873	11873		11873
518.942	14313.2	14313.2	14313.2	14313.2	14313.2	14313.2		14313.2			519.159	16701.1	16701.1	16701.1	16701.1	16701.1	16701.1		16701.1				518.665	12141.2	12141.2	12141.2	12141.2	12141.2	12141.2		12141.2
518.842	14444.5	14444.5	14444.5	14444.5	14444.5	14444.5		14444.5			519.059	16464.7	16464.7	16464.7	16464.7	16464.7	16464.7		16464.7				518.565	12155.7	12155.7	12155.7	12155.7	12155.7	12155.7		12155.7
518.742	14484.6	14484.6	14484.6	14484.6	14484.6	14484.6		14484.6			518.959	16772	16772	16772	16772	16772	16772		16772				518.465	12240.1	12240.1	12240.1	12240.1	12240.1	12240.1		12240.1
